# Supplementary material for: Functional Activity of Enantiomeric Oximes and Diastereomeric Amines and Cyano Substituents at C9 in 3-Hydroxy-N-phenethyl-5-phenylmorphans
Source: MDPI journal article supplement (doi:10.3390/molecules29091926), 2024-04-23
Supplement: s1 [file s1]

## **SUPPLEMENTARY MATERIAL**

### **Functional Activity of Enantiomeric Oximes and Diastereomeric Amines and Cyano**

#### **Substituents at C9 in 3-Hydroxy-*N*-phenethyl-5-phenylmorphans**

Hudson G. Roth<sup>1</sup>, Madhurima Das<sup>1</sup>, Agnieszka Sulima<sup>1</sup>, Dan Luo<sup>2</sup>, Sophia Kaska<sup>2</sup>, Thomas E. Prisinzano<sup>2</sup>, Andrew T. Kerr,<sup>3</sup> Arthur E. Jacobson<sup>1,\*</sup>, Kenner C. Rice<sup>1,\*</sup>

<sup>1</sup>Drug Design and Synthesis Section, Molecular Targets and Medications Discovery Branch, Intramural Research Program, National Institute on Drug Abuse and the National Institute on Alcohol Abuse and Alcoholism, National Institutes of Health, Department of Health and Human Services, 9800 Medical Center Drive, Bethesda, MD 20892-3373, USA

<sup>2</sup>Department of Pharmaceutical Sciences, College of Pharmacy, University of Kentucky, 789 S. Limestone Street, Lexington, Kentucky 40536, USA

<sup>3</sup>Center for Biomolecular Science and Engineering, Naval Research Laboratory, Washington, DC 20375-0001, USA

\*Correspondence: arthurj@nida.nih.gov (A.E.J.); kennerr@nida.nih.gov (K.C.R.)

Tel.: +1-301-451-5028 (A.E.J.); +1-301-451-4799 (K.C.R.)

#### **Supplementary Data**

|                                                |                |                           |
|------------------------------------------------|----------------|---------------------------|
| <sup>1</sup> H and <sup>13</sup> C NMR spectra | Figures S1-S37 | Pages 2-38, respectively  |
| X-ray Spectroscopic data                       | Tables S1-S7   | Pages 39-49, respectively |

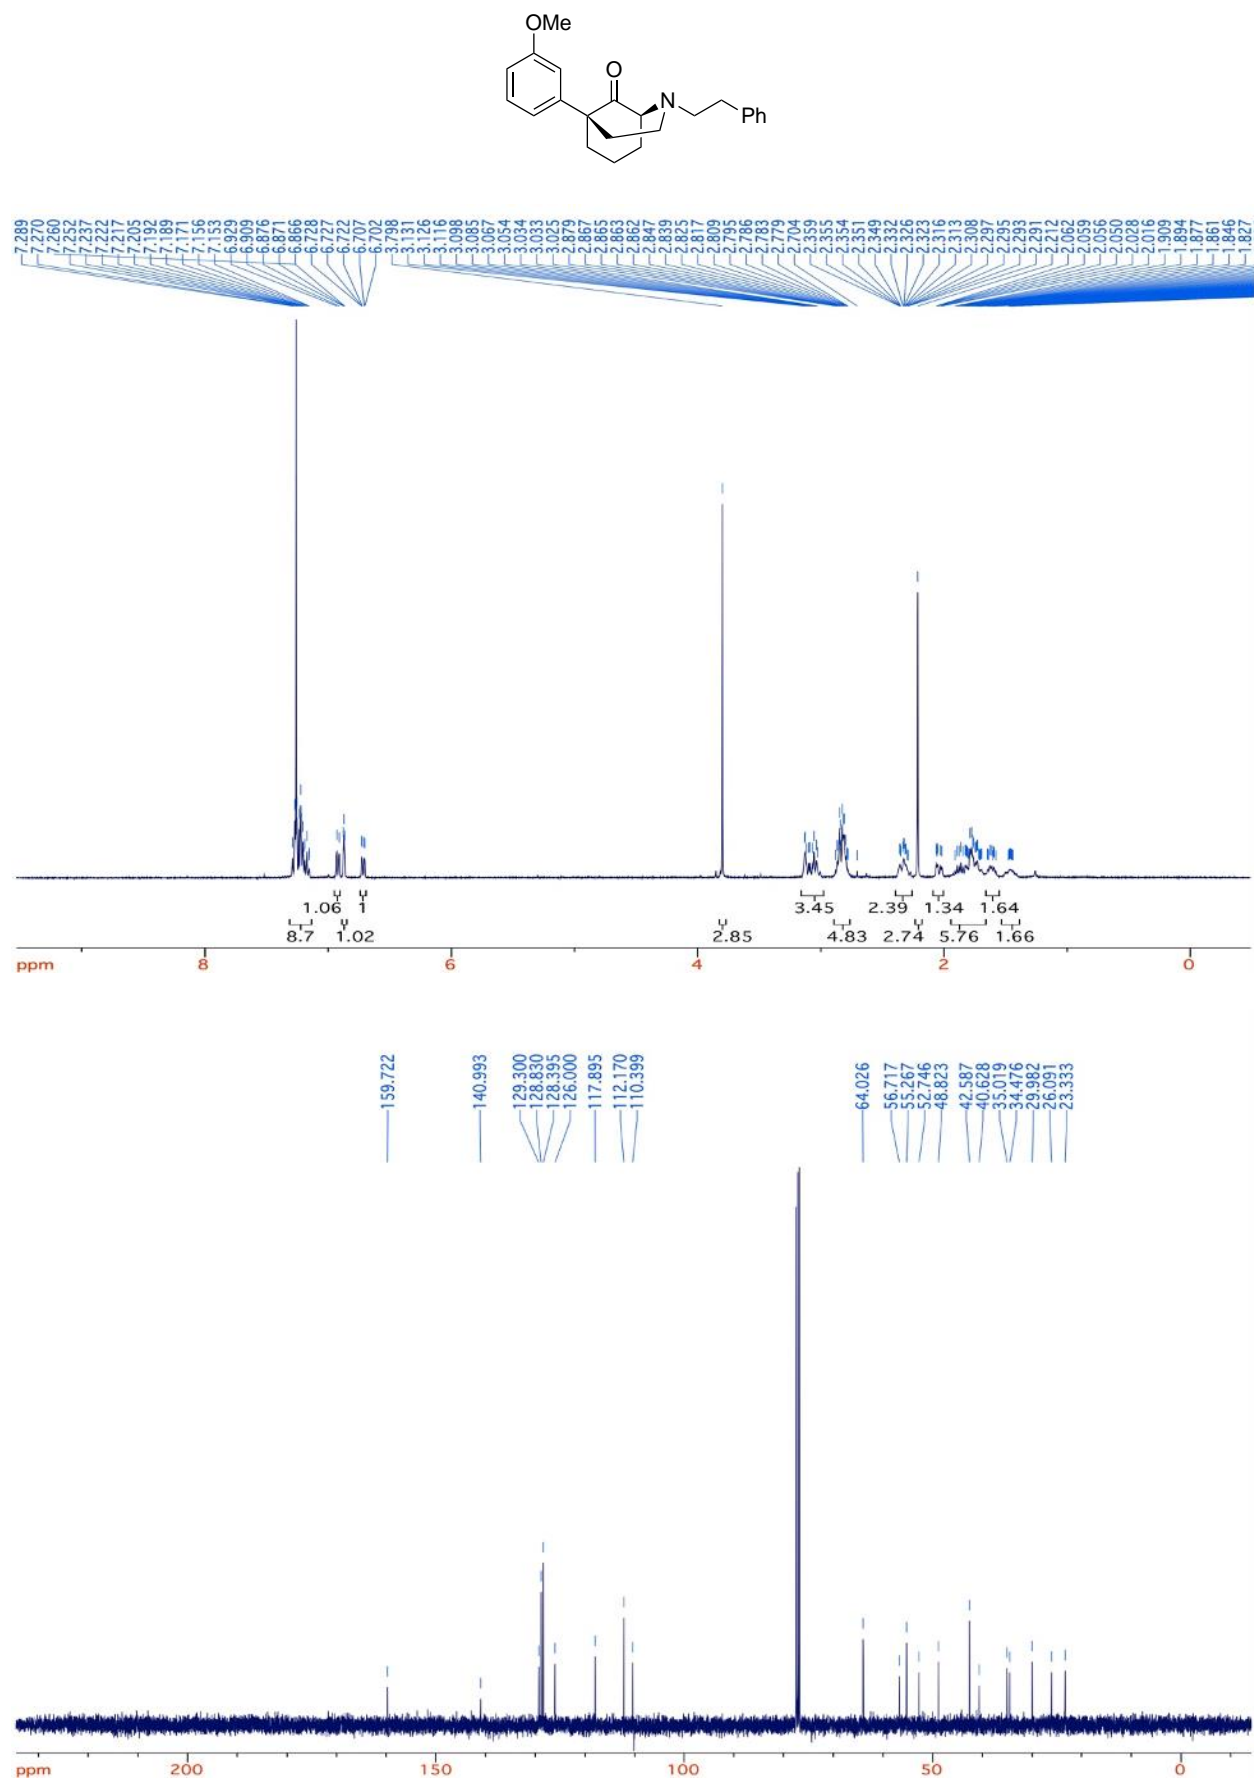

**Figure S1.** <sup>1</sup>H NMR and <sup>13</sup>C NMR of 1S,5S-1

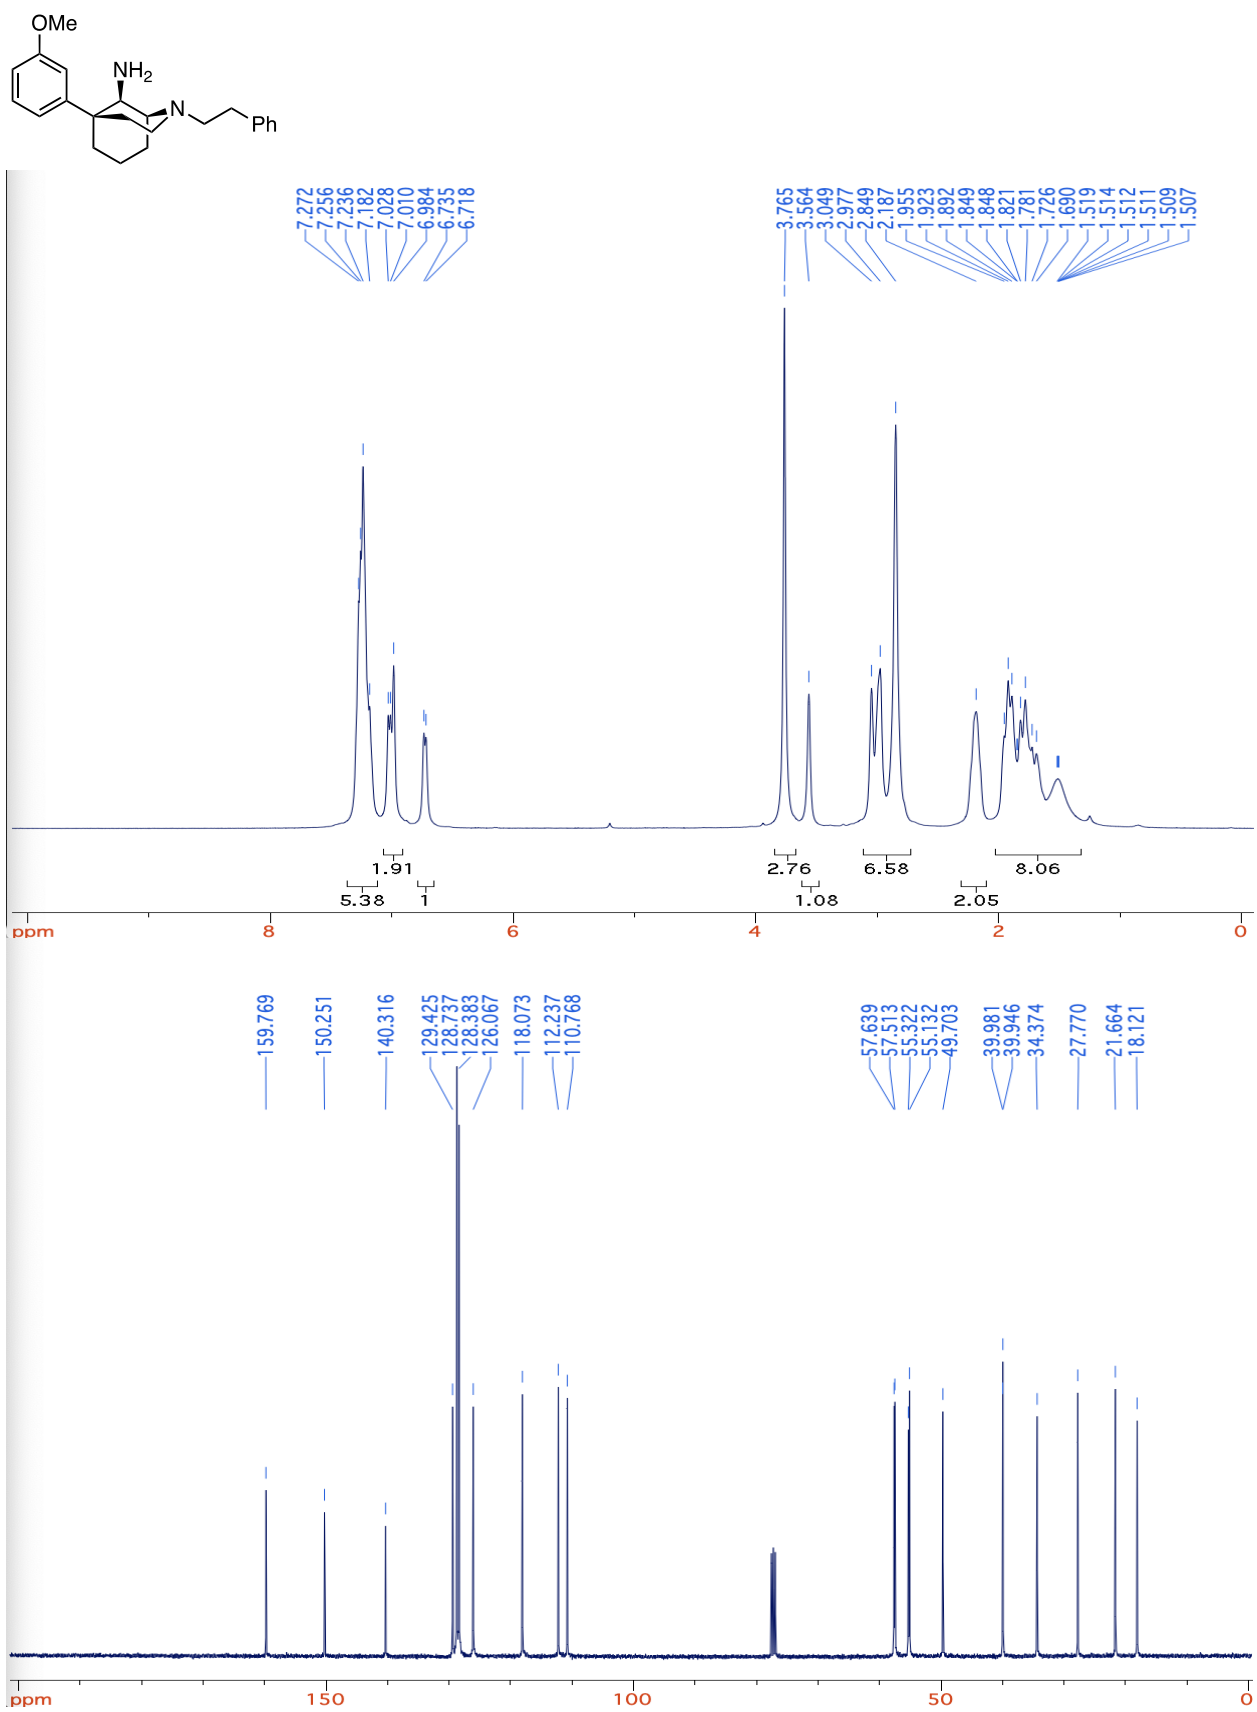

**Figure S2.** <sup>1</sup>H NMR and <sup>13</sup>C NMR of 1*S*,5*S*,9*R*-2

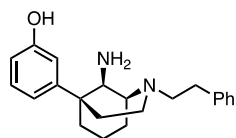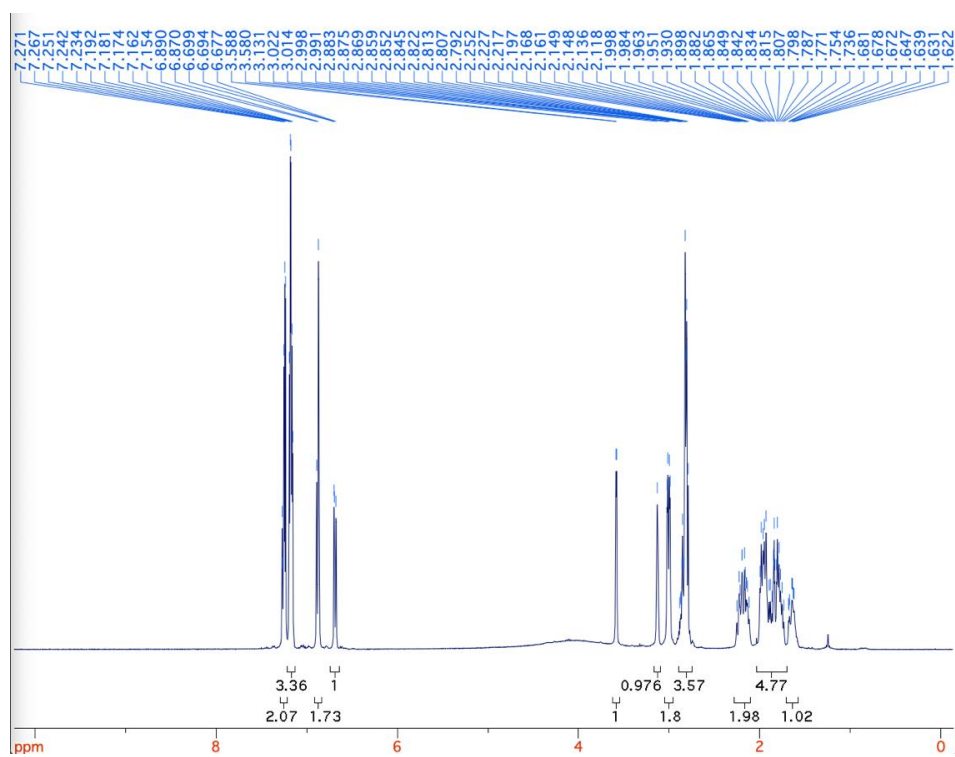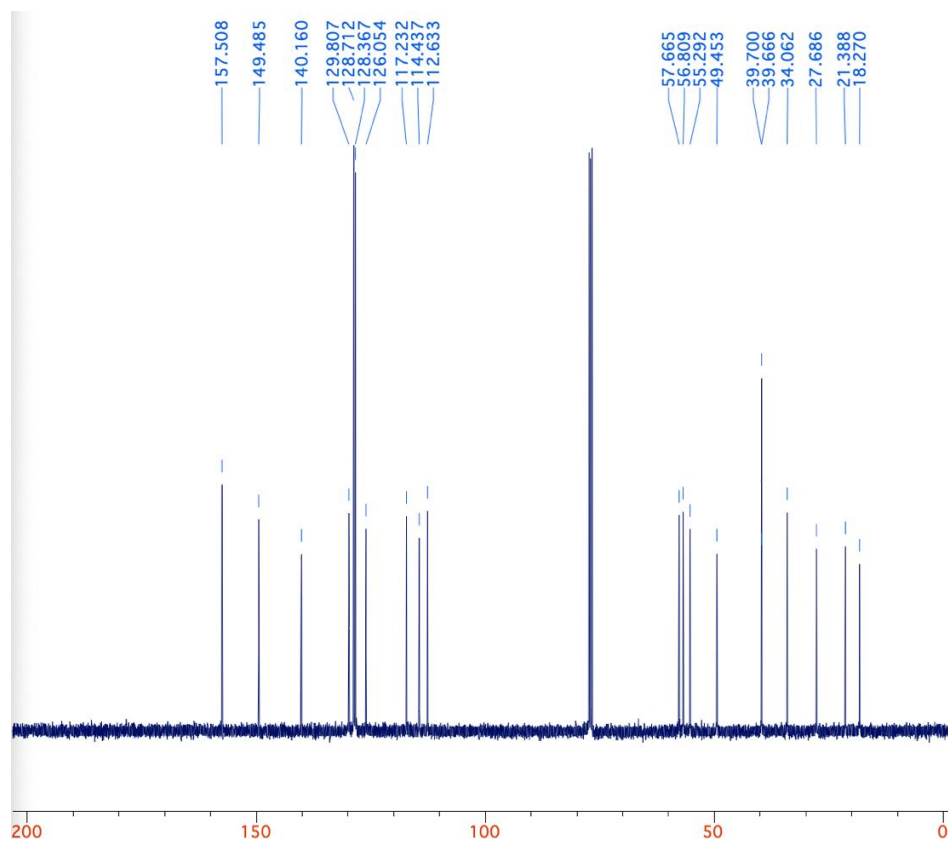

**Figure S3.** <sup>1</sup>H NMR and <sup>13</sup>C NMR of 15,5S,9R-3



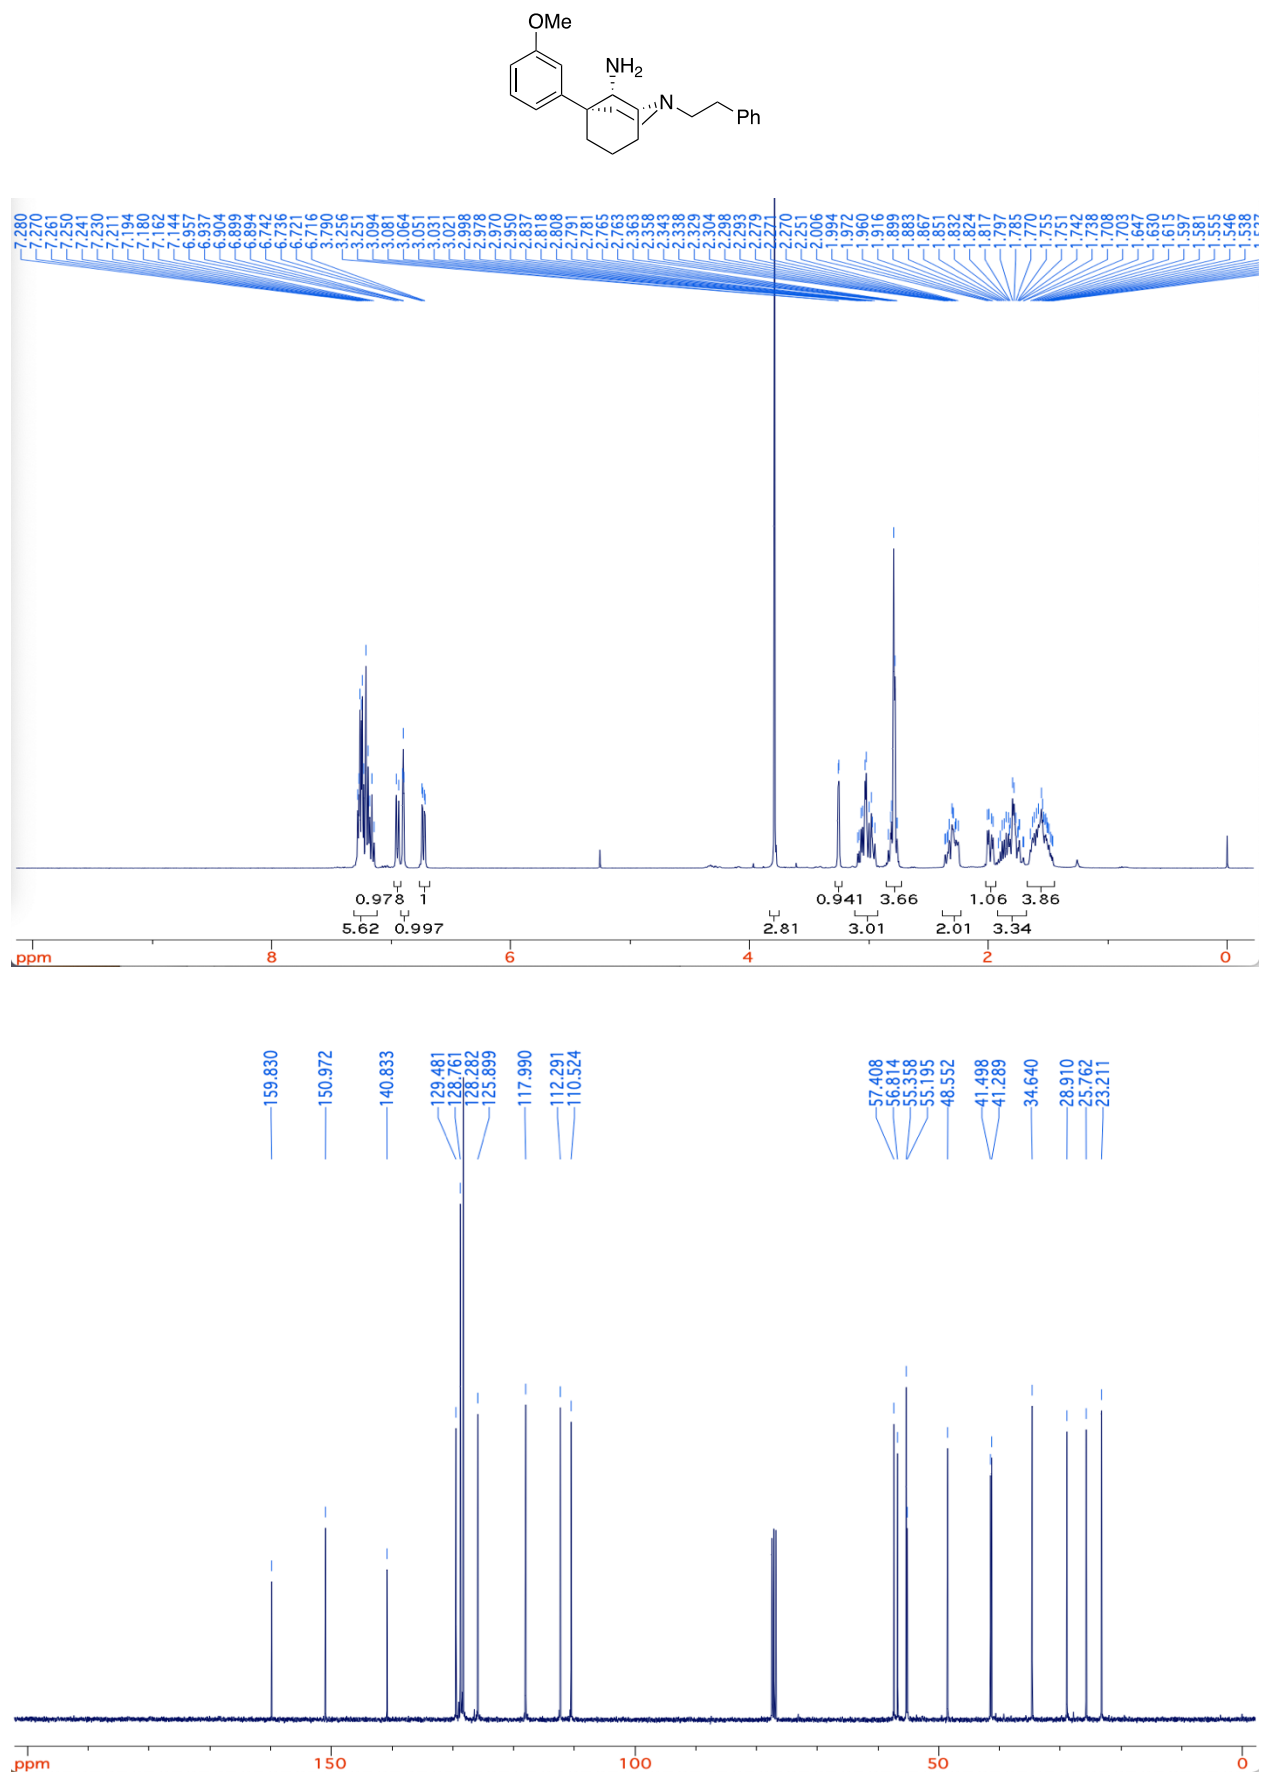

**Figure S4.** <sup>1</sup>H NMR and <sup>13</sup>C NMR of 1*R*,5*R*,9*S*-5

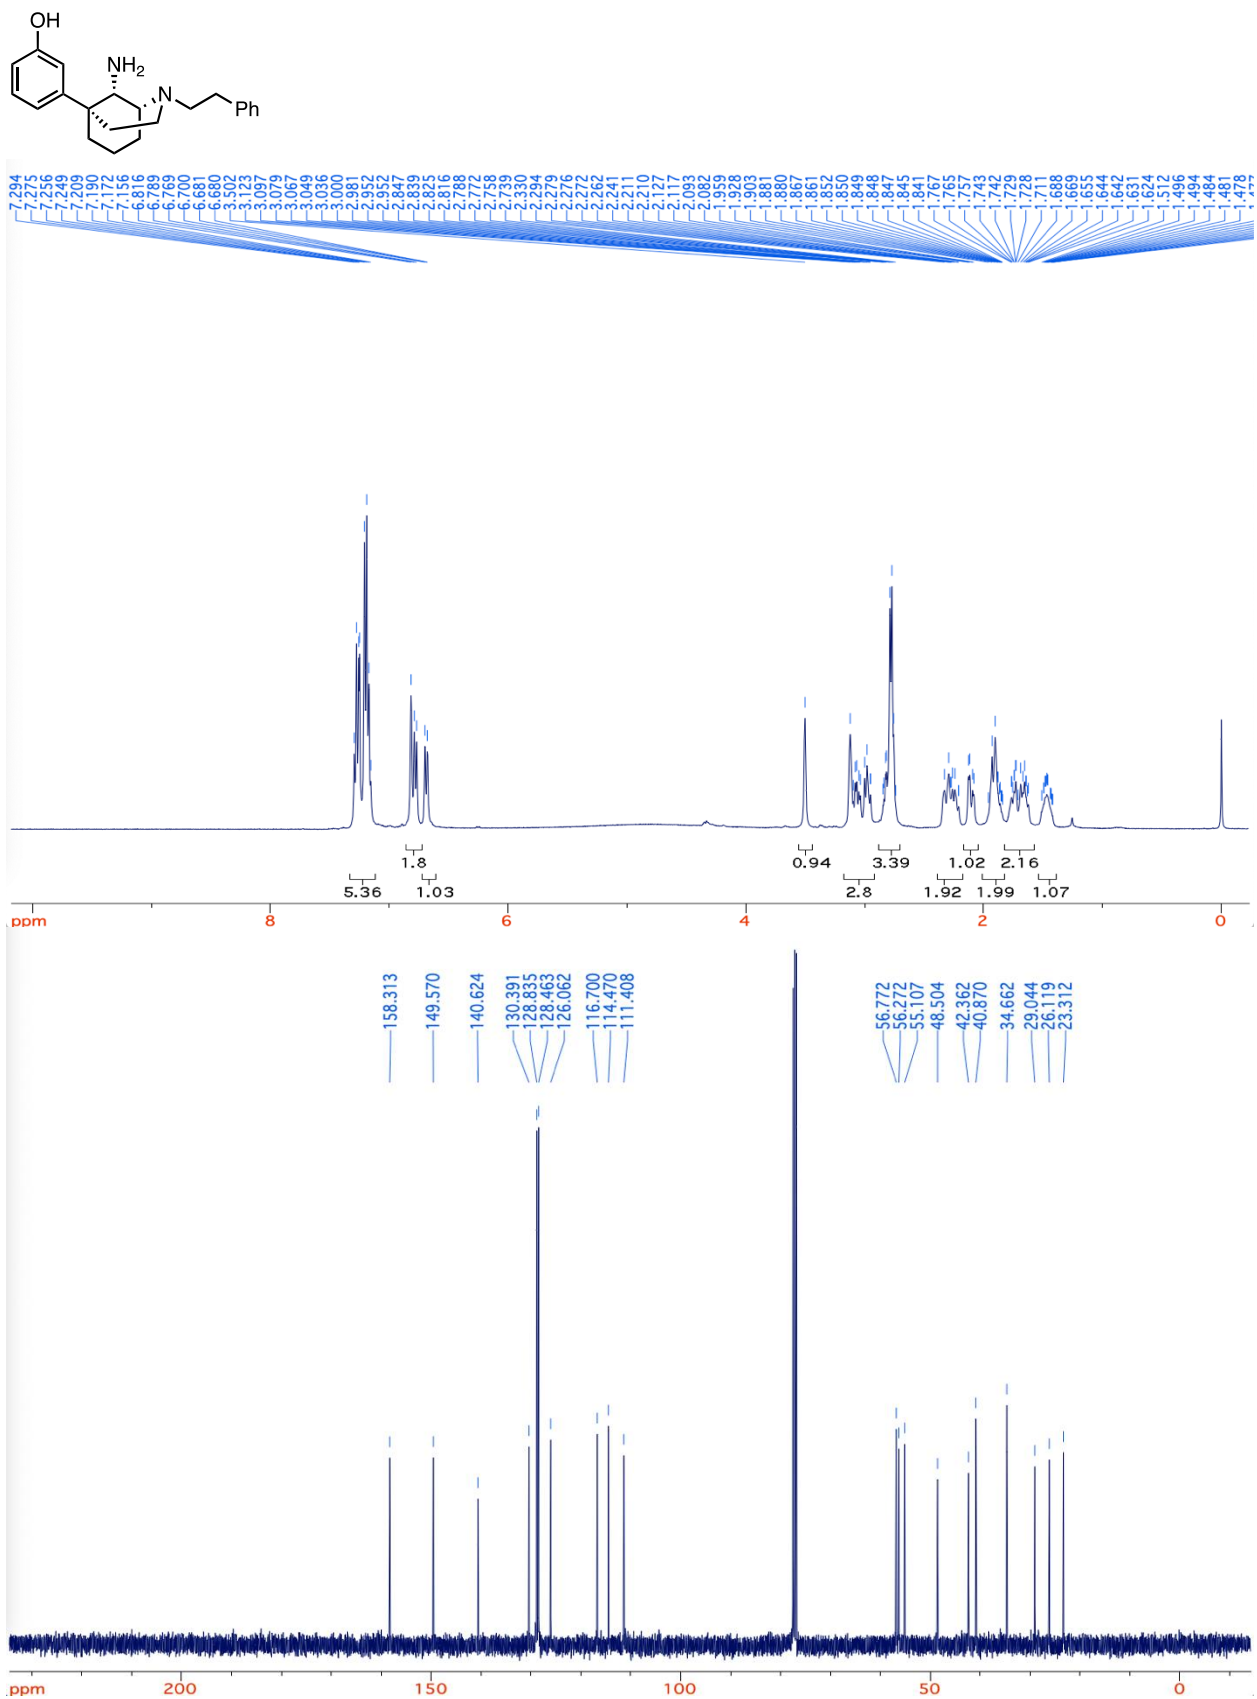

**Figure S5.** <sup>1</sup>H NMR and <sup>13</sup>C NMR of 1*R*,5*R*,9*S*-6

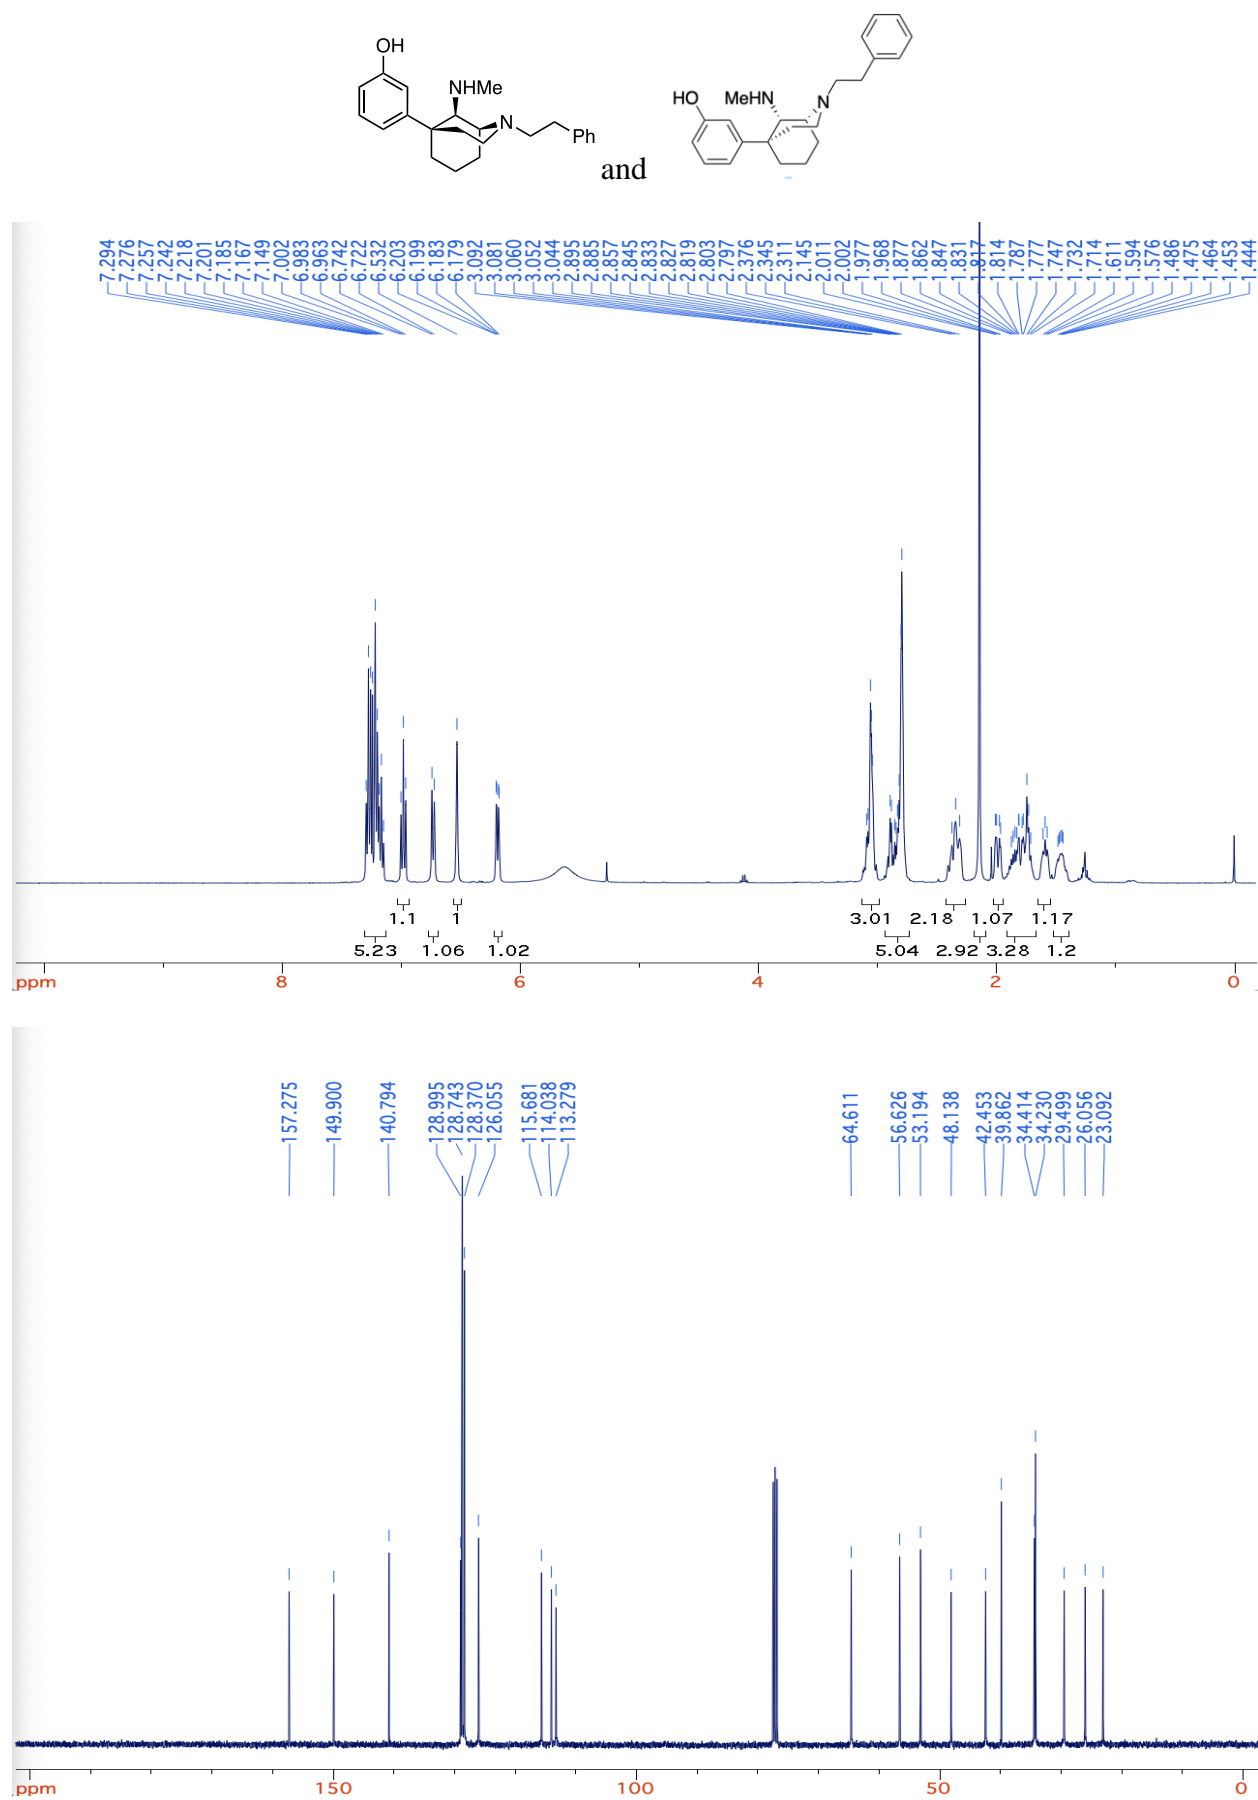

**Figure S6.** <sup>1</sup>H NMR and <sup>13</sup>C NMR of **1S,5S,9R-8** and **1R,5R,9S-10**

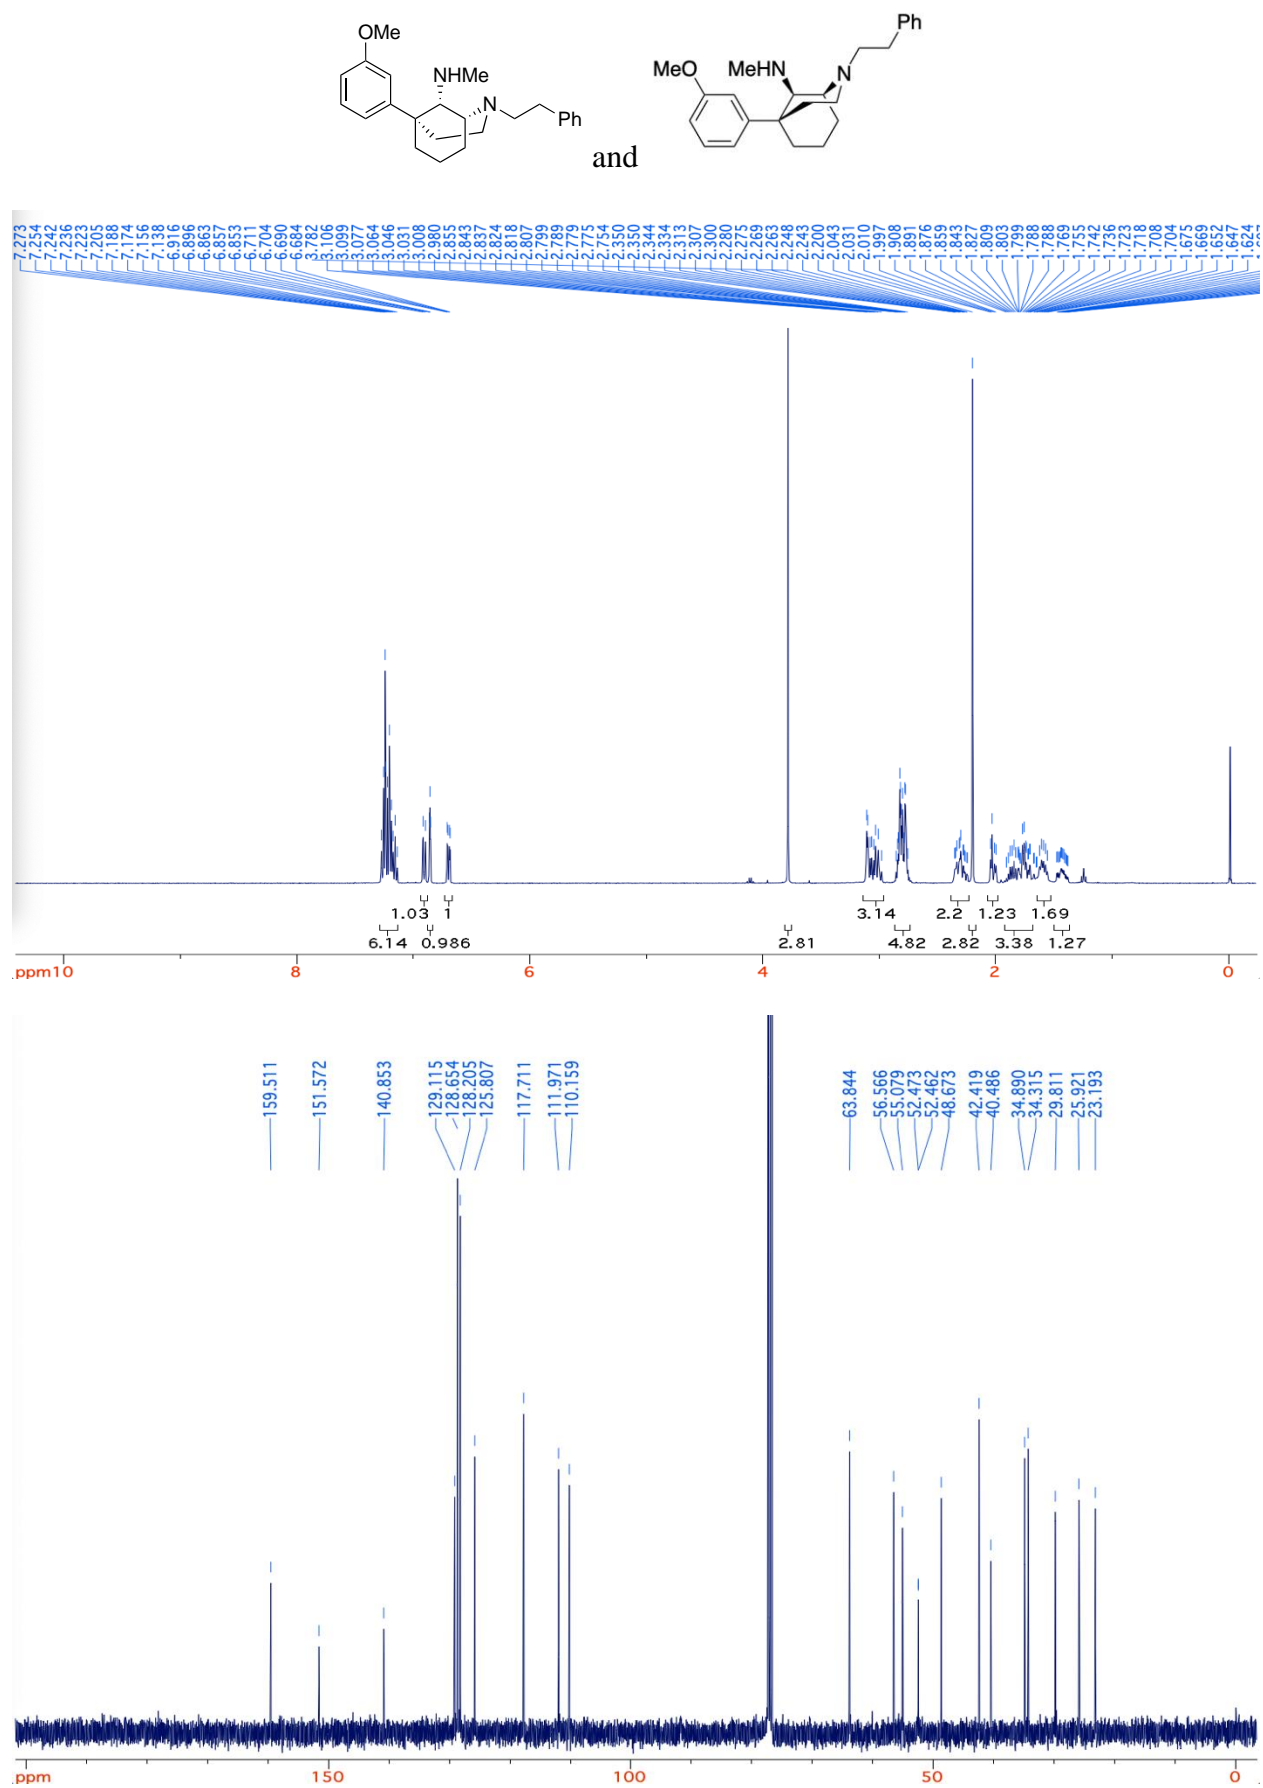

**Figure S7.** <sup>1</sup>H NMR and <sup>13</sup>C NMR of **1S,5S,9R-7** and **1R,5R,9S-9**

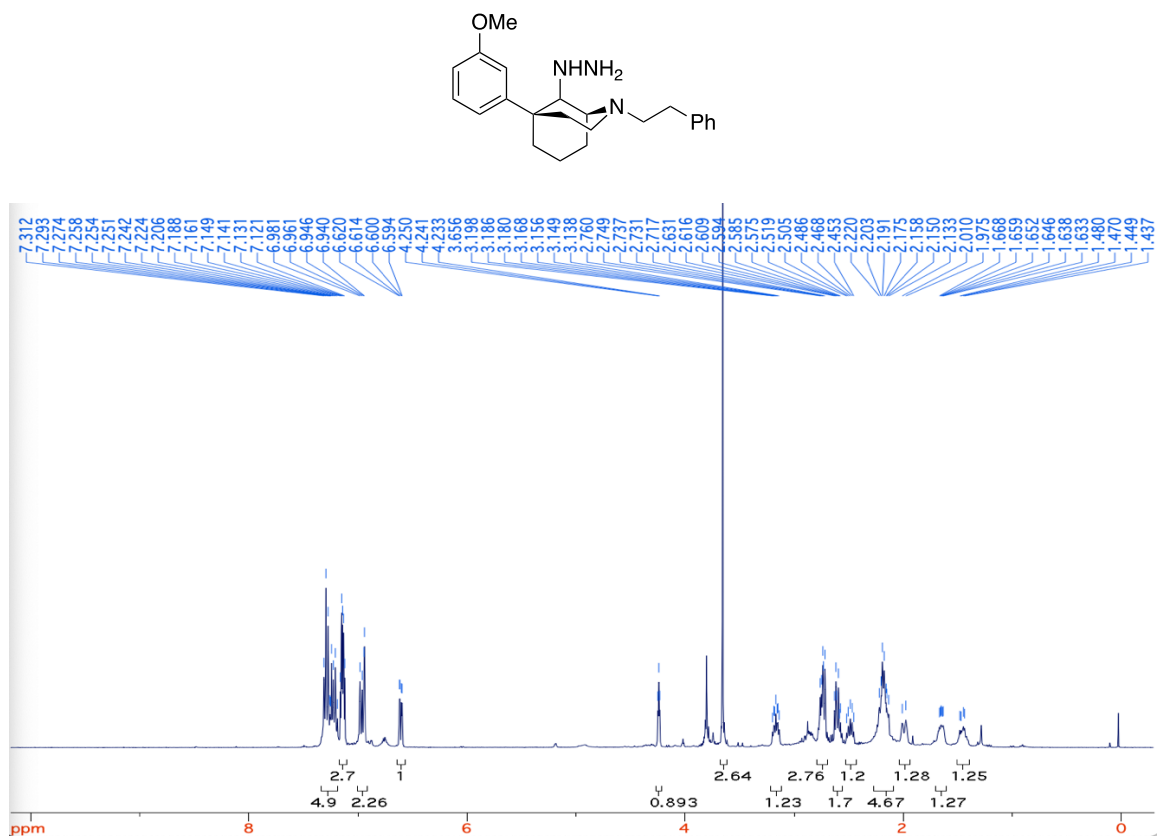

Figure S8.  $^1\text{H}$  NMR of 11

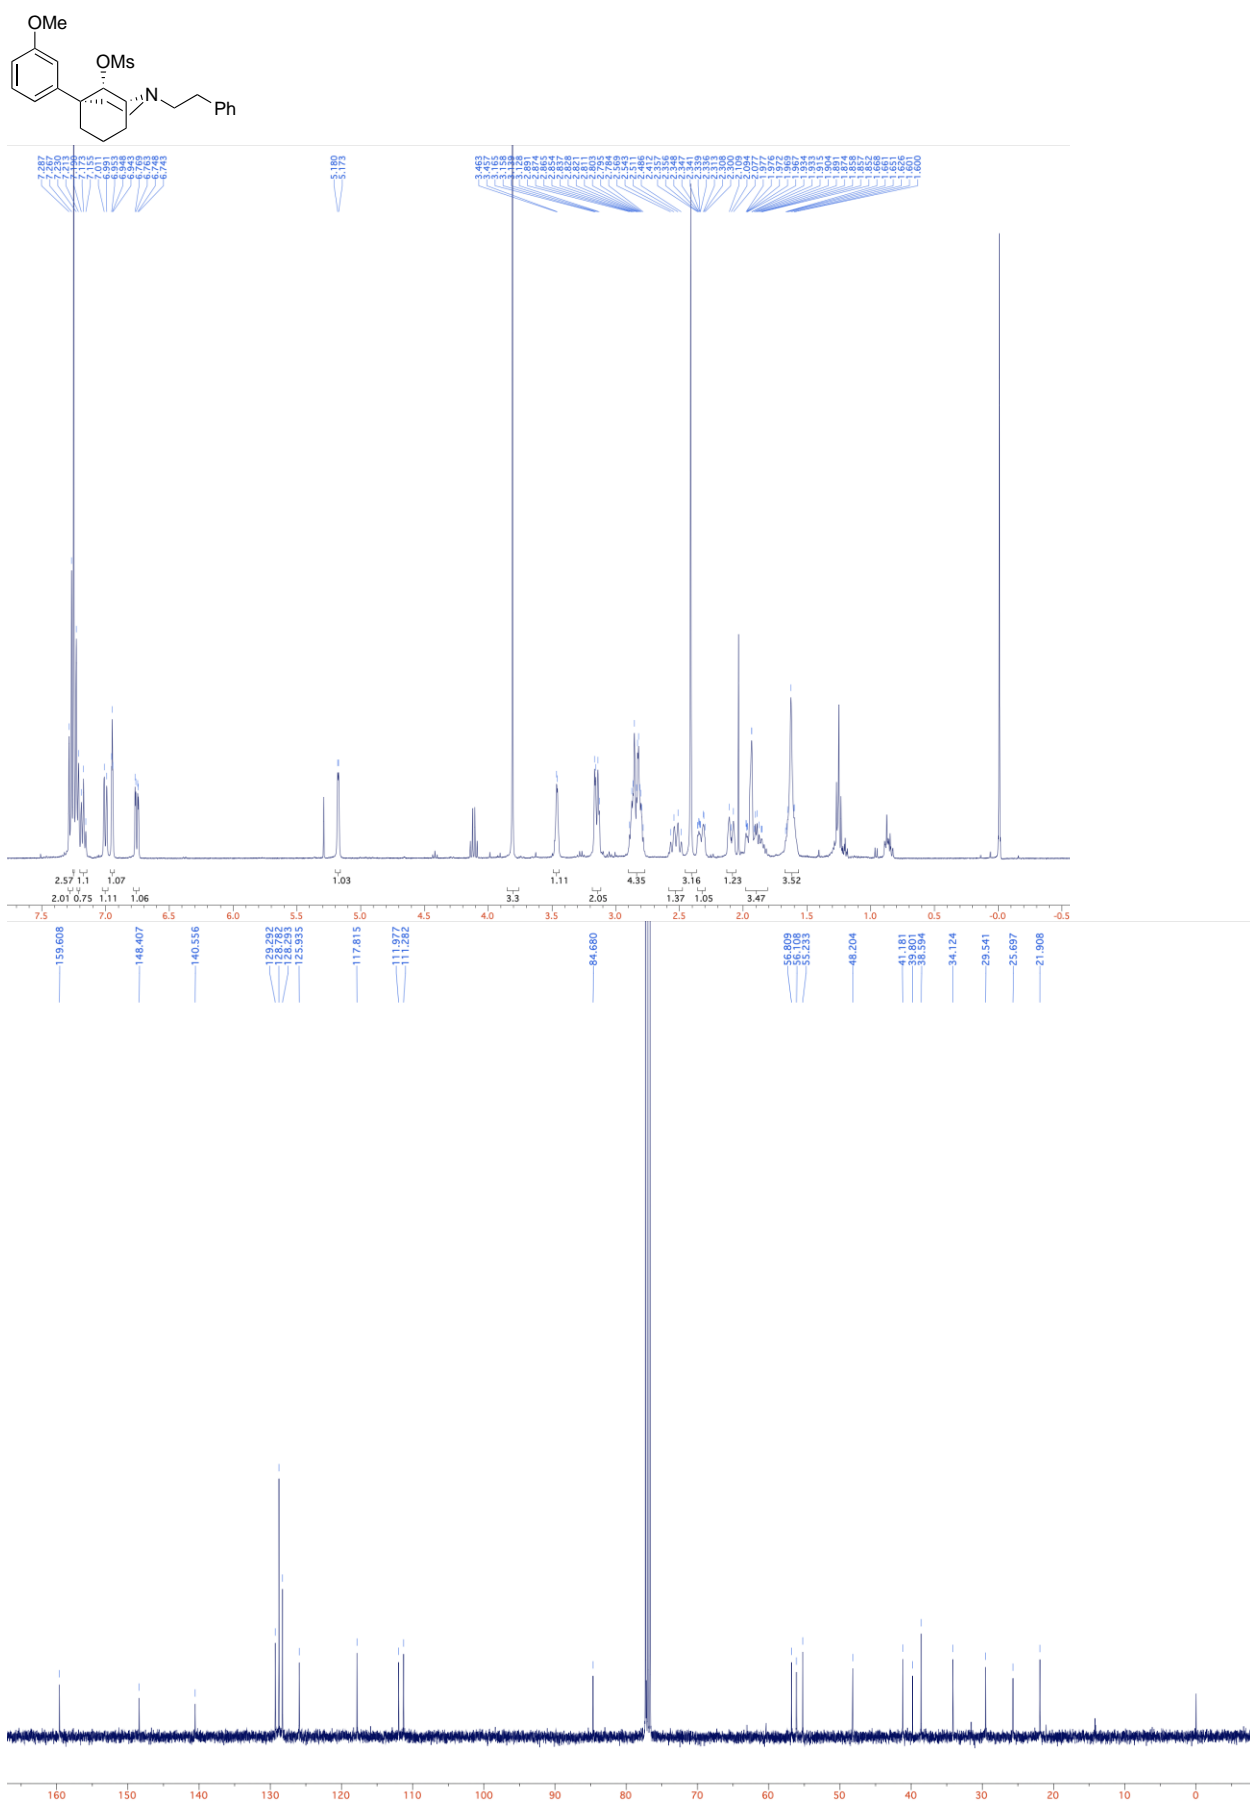

**Figure S9.**  $^1\text{H}$  NMR and  $^{13}\text{C}$  NMR of 1*R*,5*R*,9*S*-13

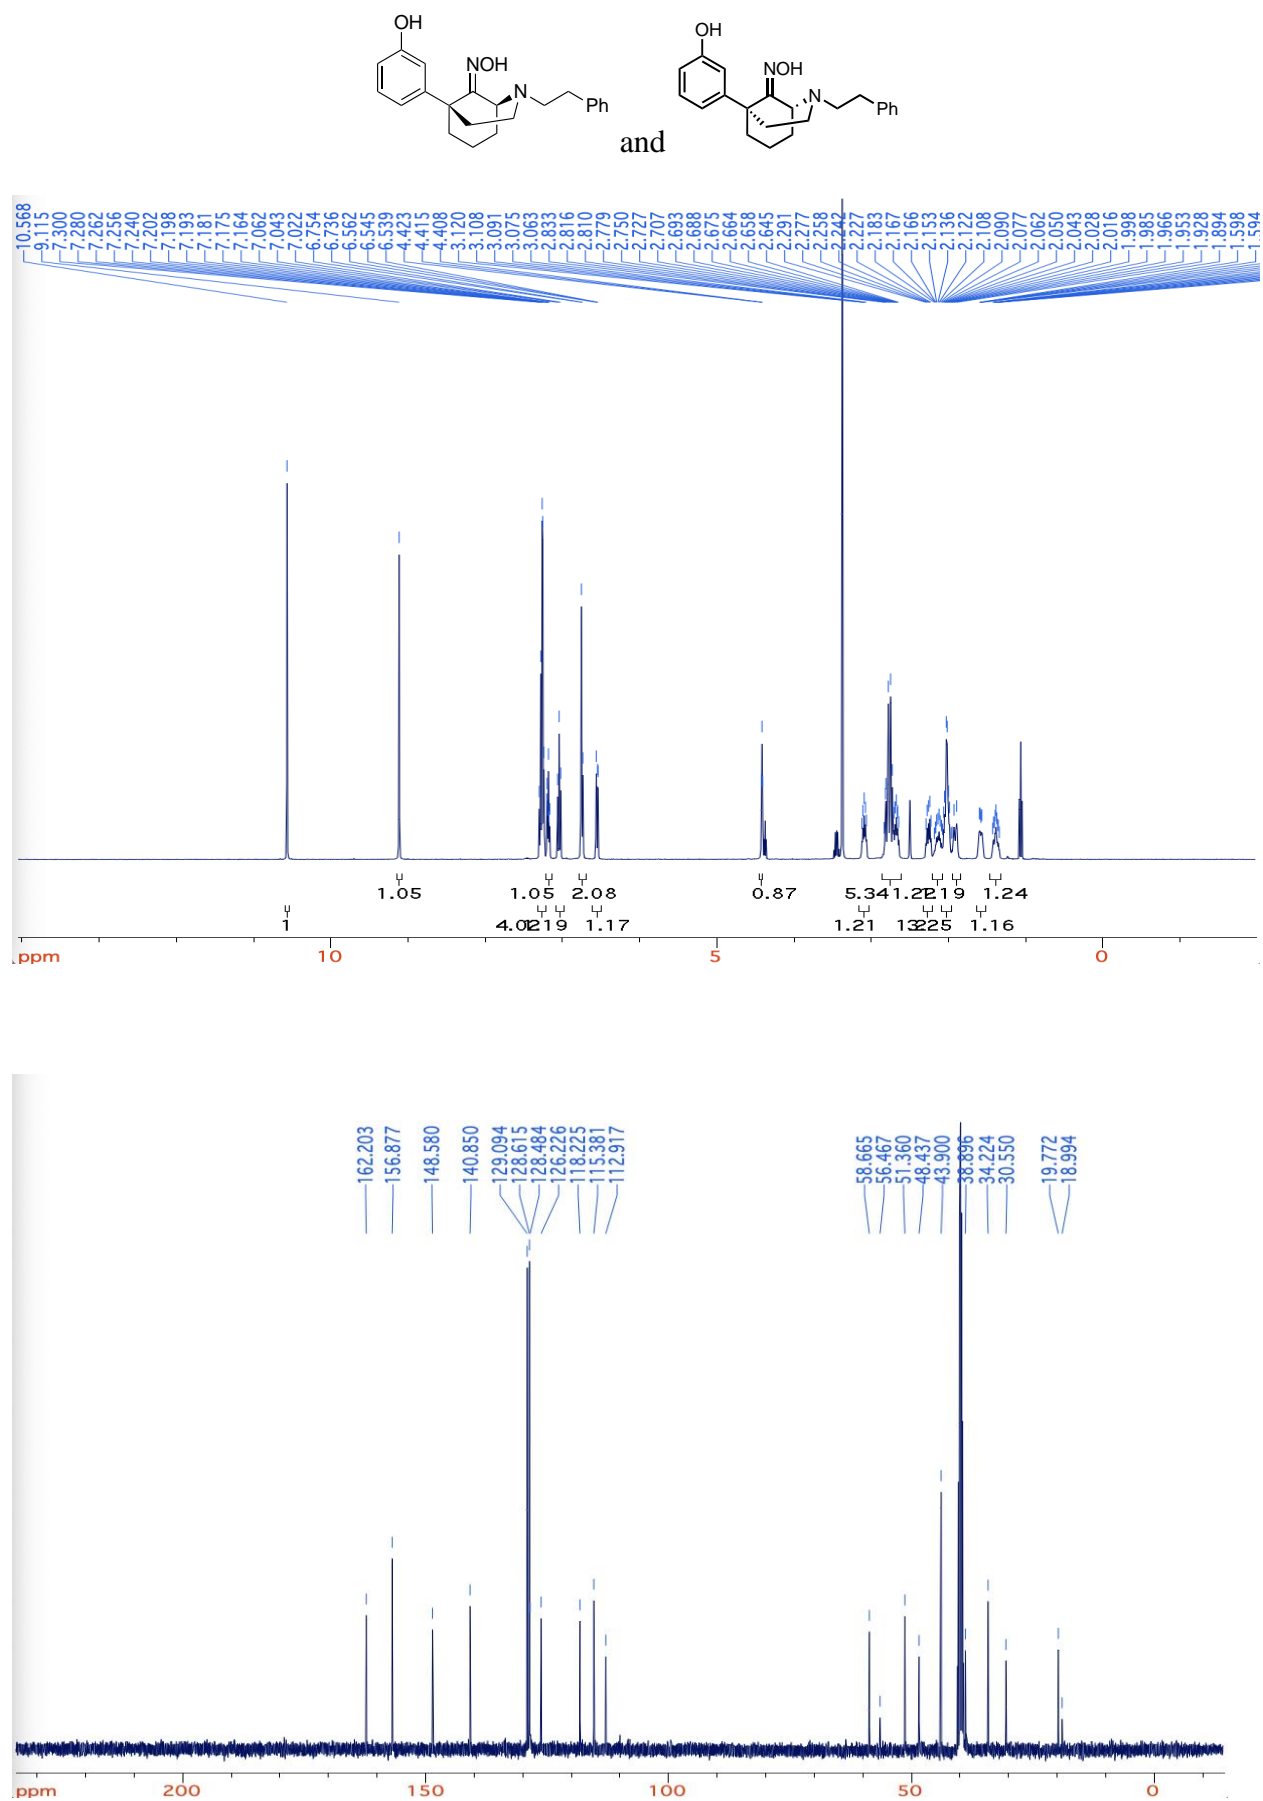

**Figure S10.** <sup>1</sup>H NMR and <sup>13</sup>C NMR of 1*S*,5*S*-**15** and 1*R*,5*R*-**17**

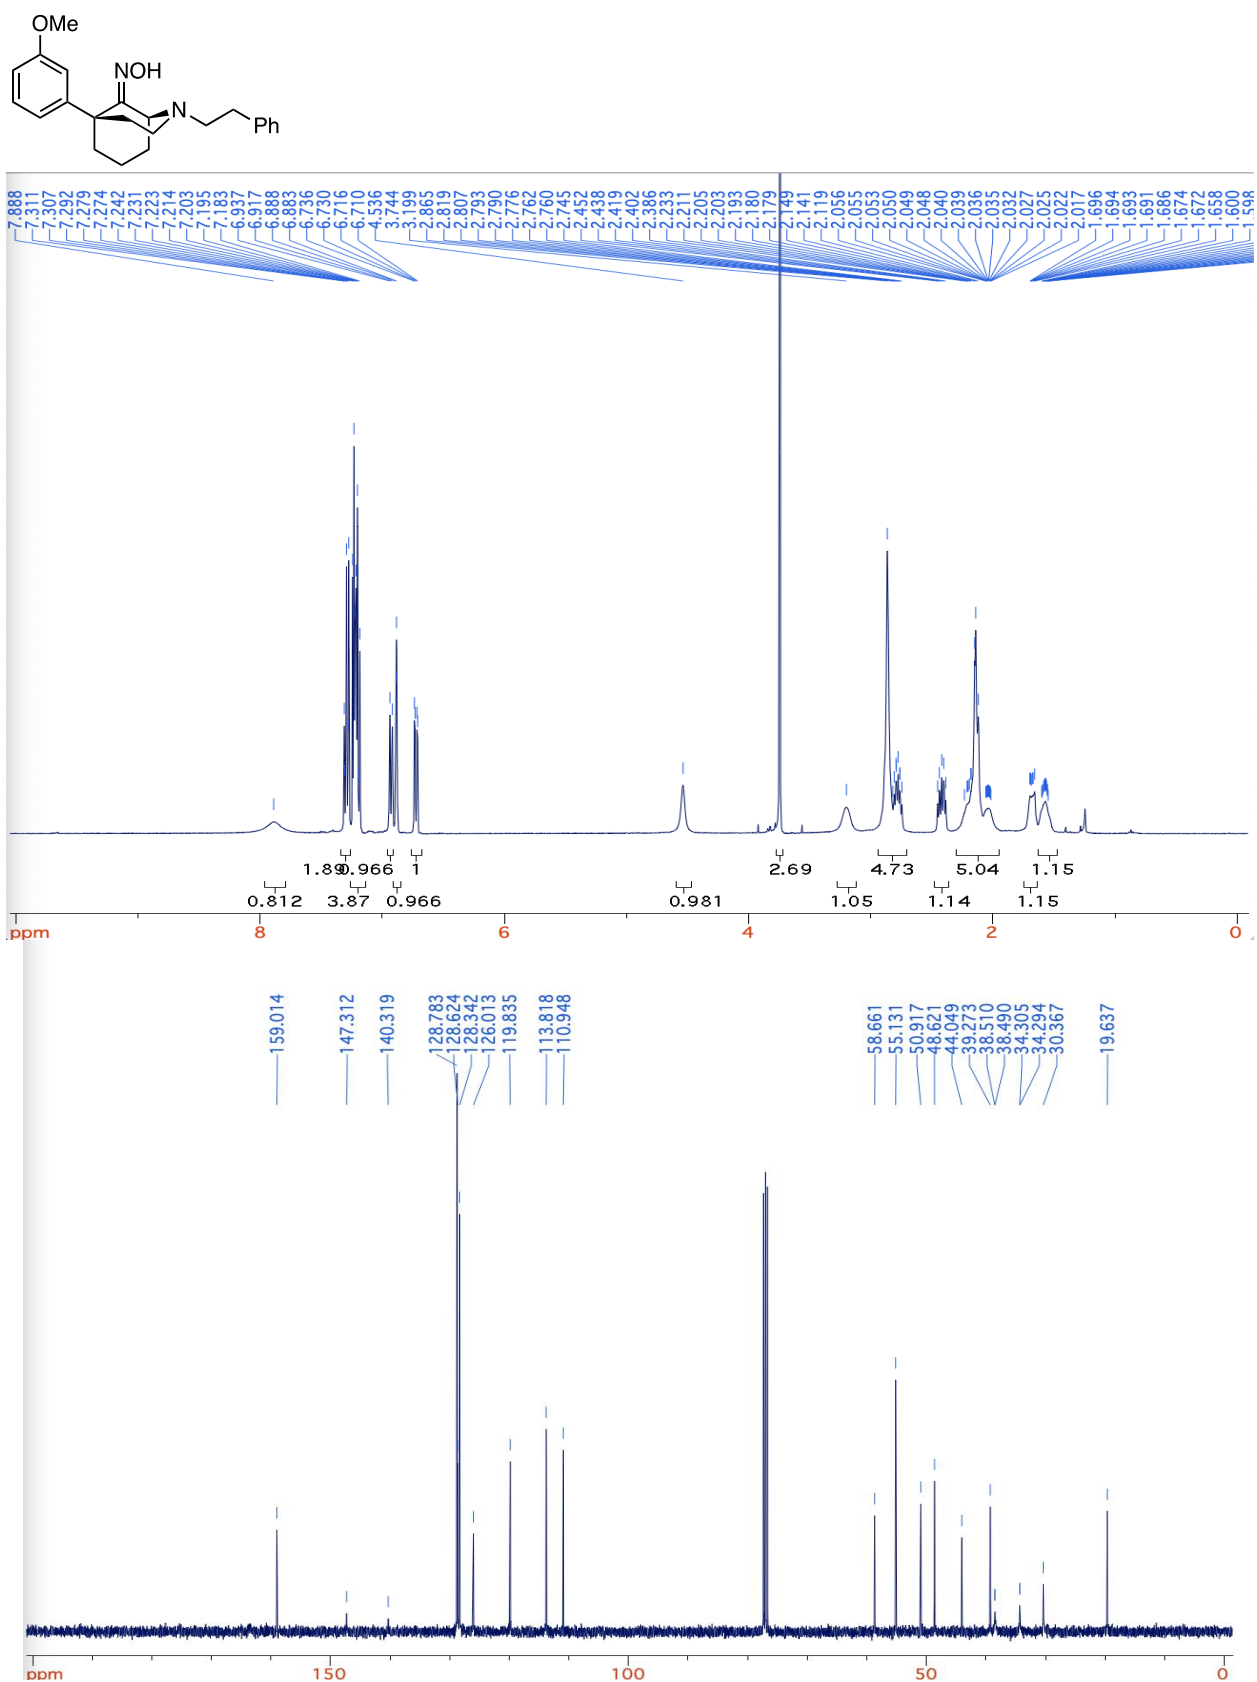

Figure S11. <sup>1</sup>H NMR and <sup>13</sup>C NMR of 1S,5S-18



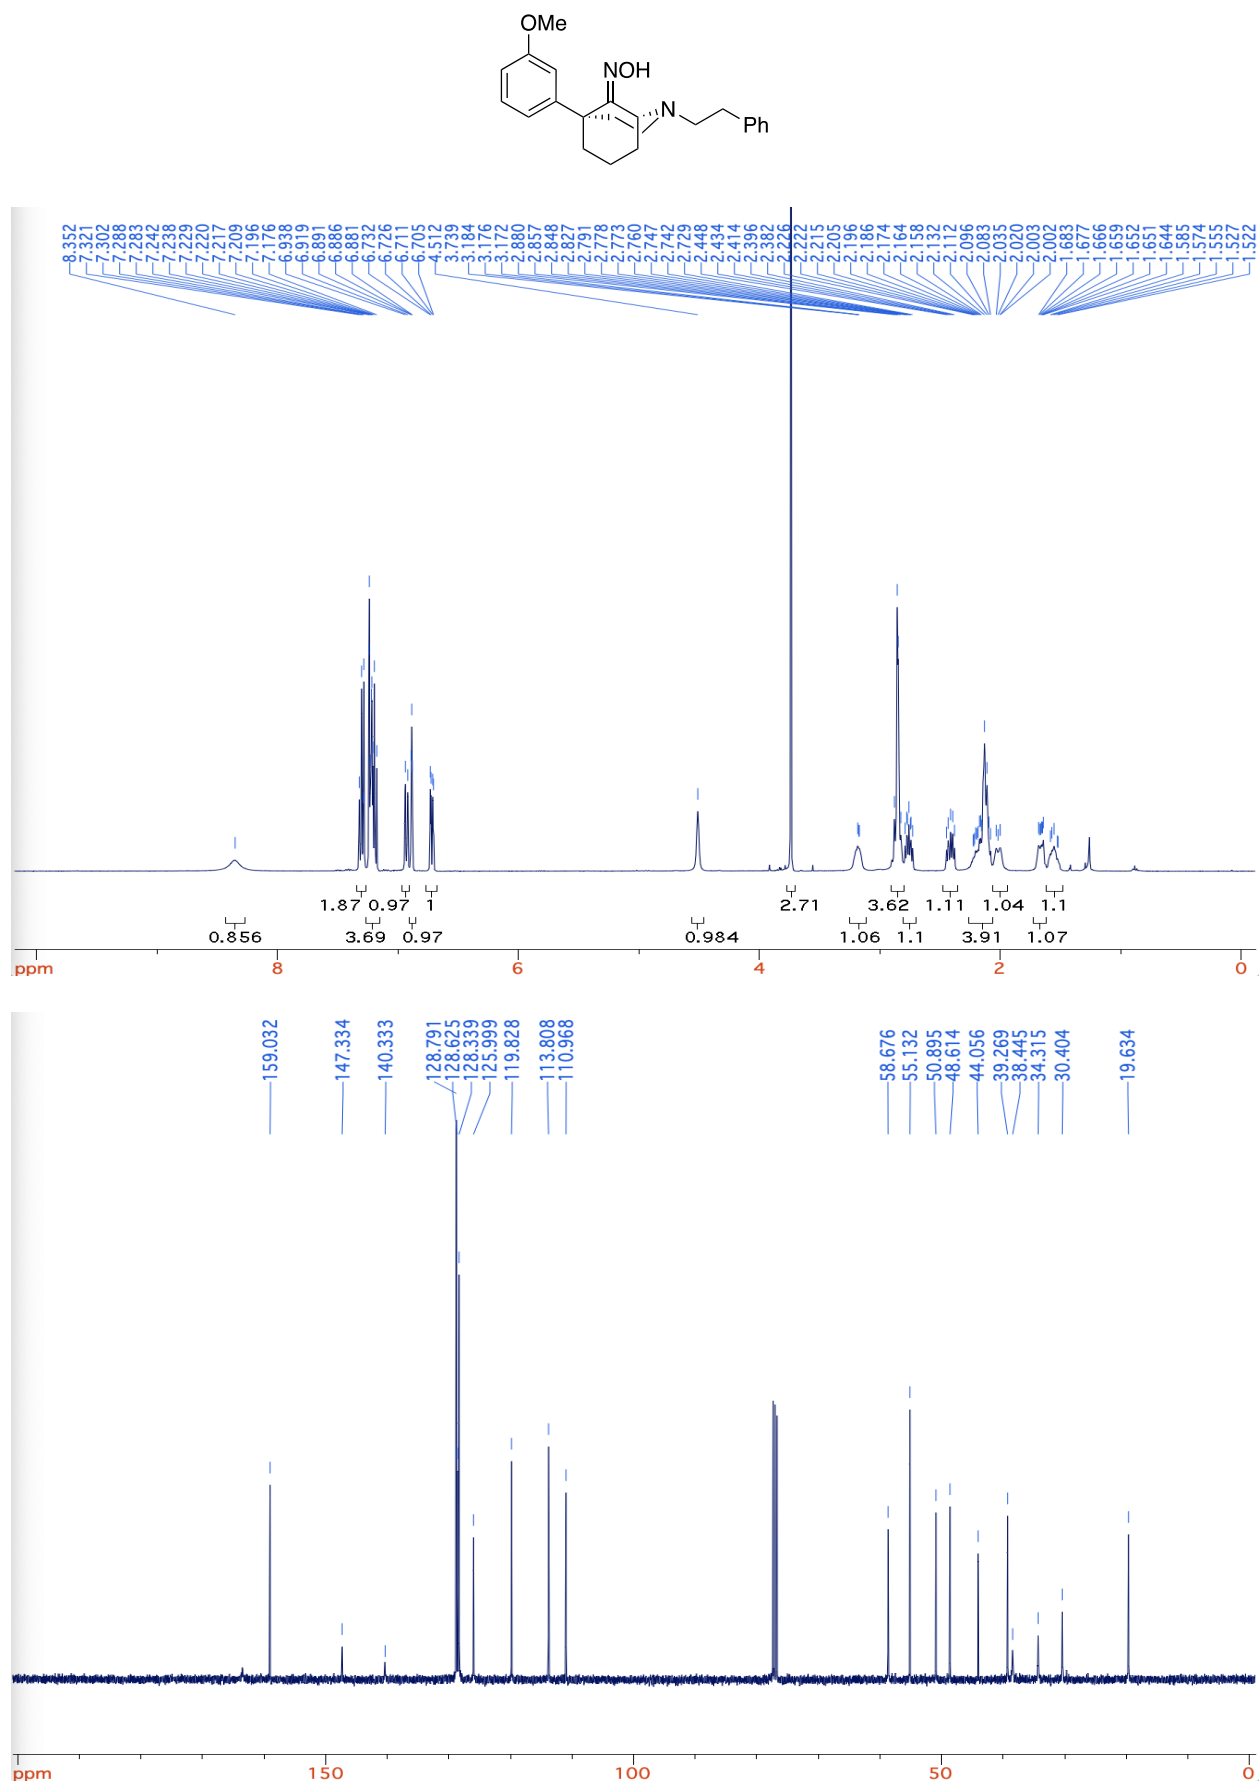

**Figure S12.** <sup>1</sup>H NMR and <sup>13</sup>C NMR of 1R,5R-19

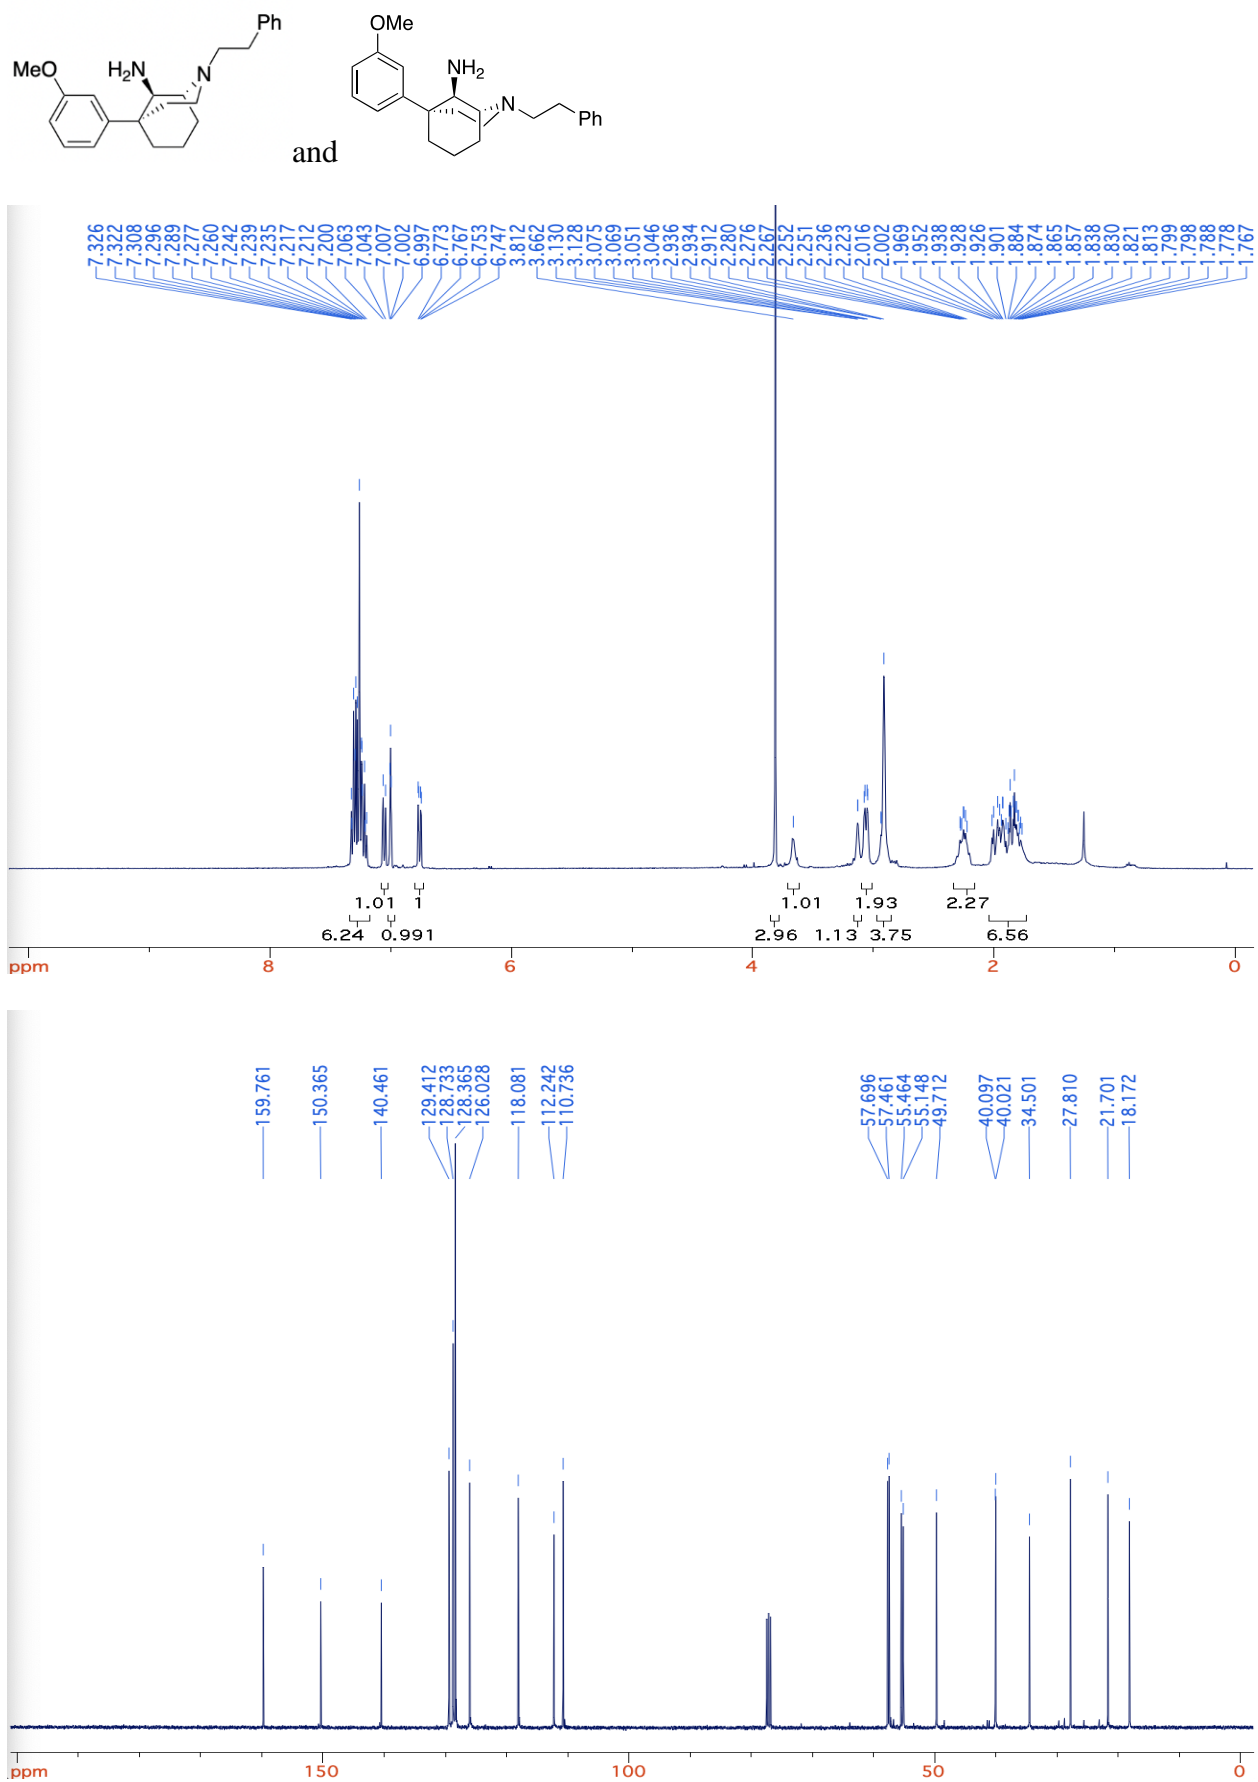

**Figure S13.** <sup>1</sup>H NMR and <sup>13</sup>C NMR of **1R,5R,9R-20** and **1S,5S,9S-21**

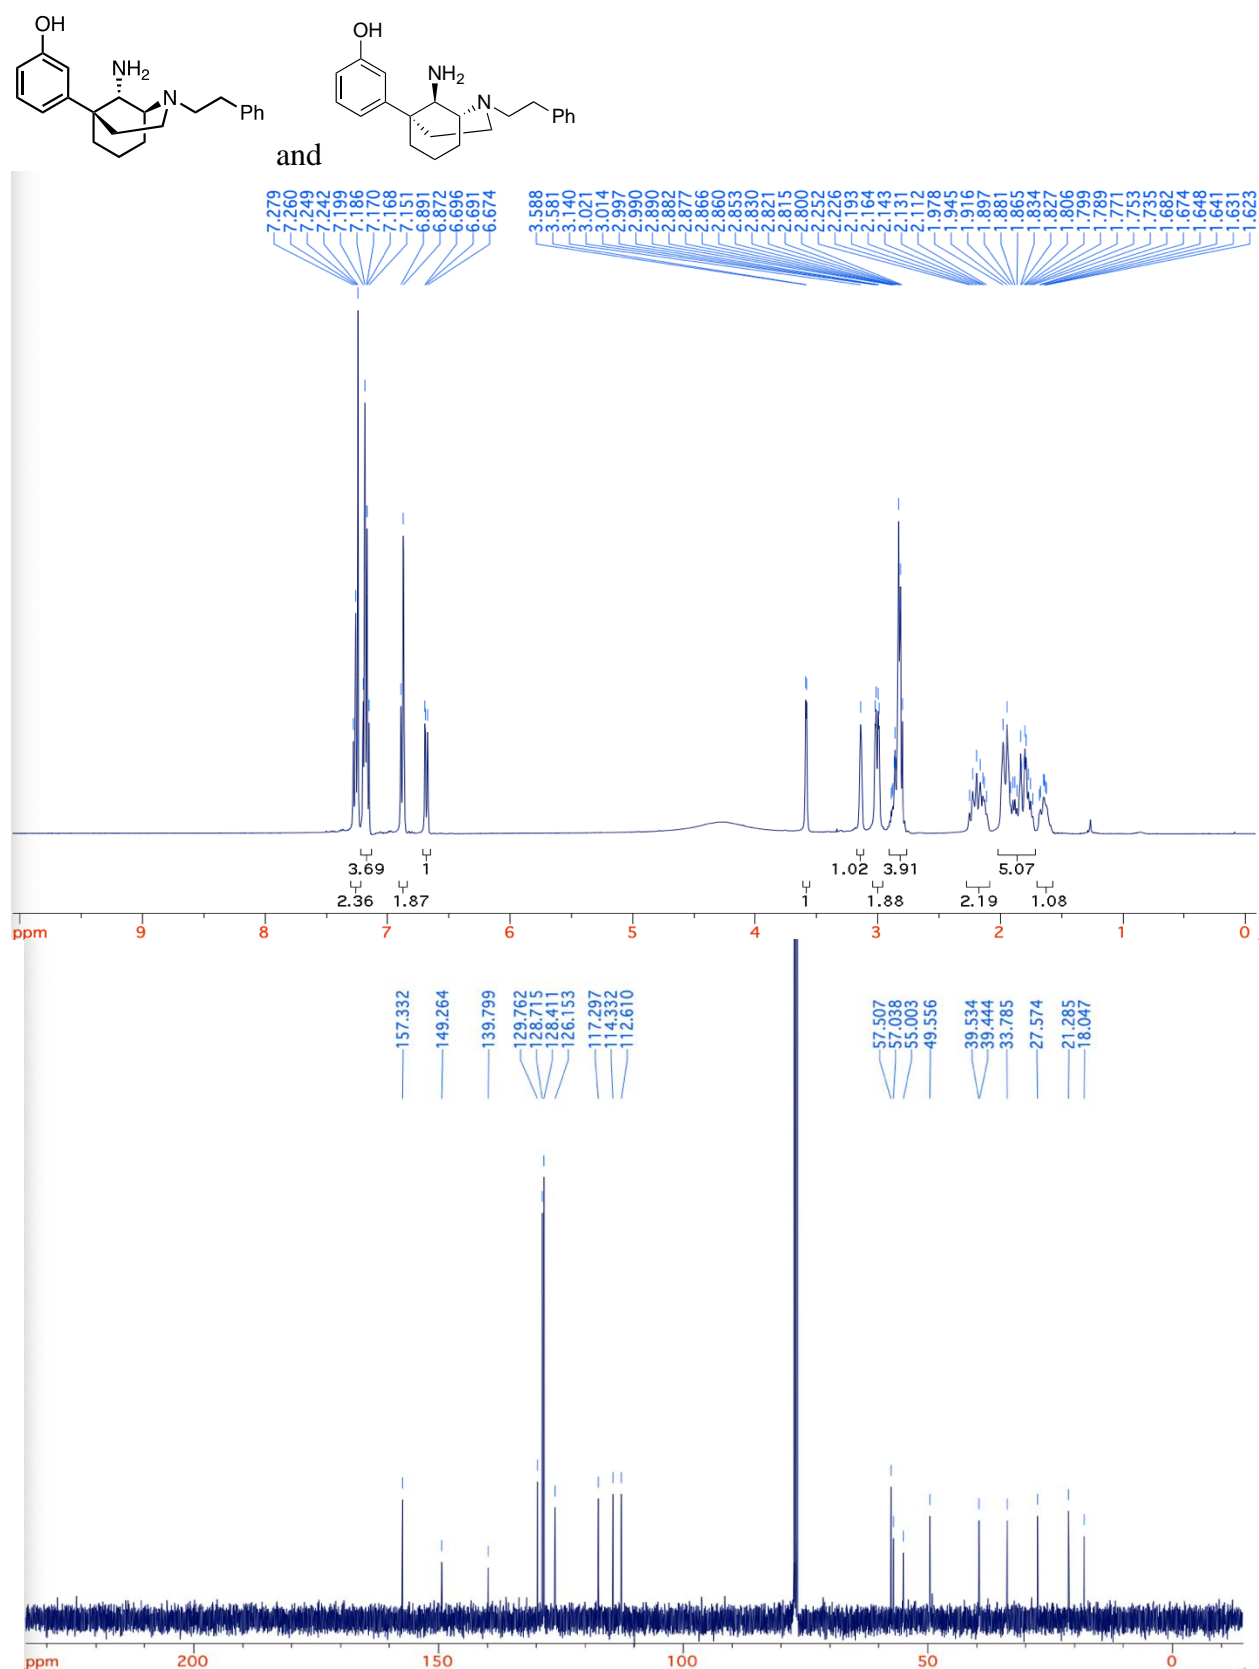

**Figure S14.** <sup>1</sup>H NMR and <sup>13</sup>C NMR of **1*S*,5*S*,9*S*-22** and **1*R*,5*R*,9*R*-23**

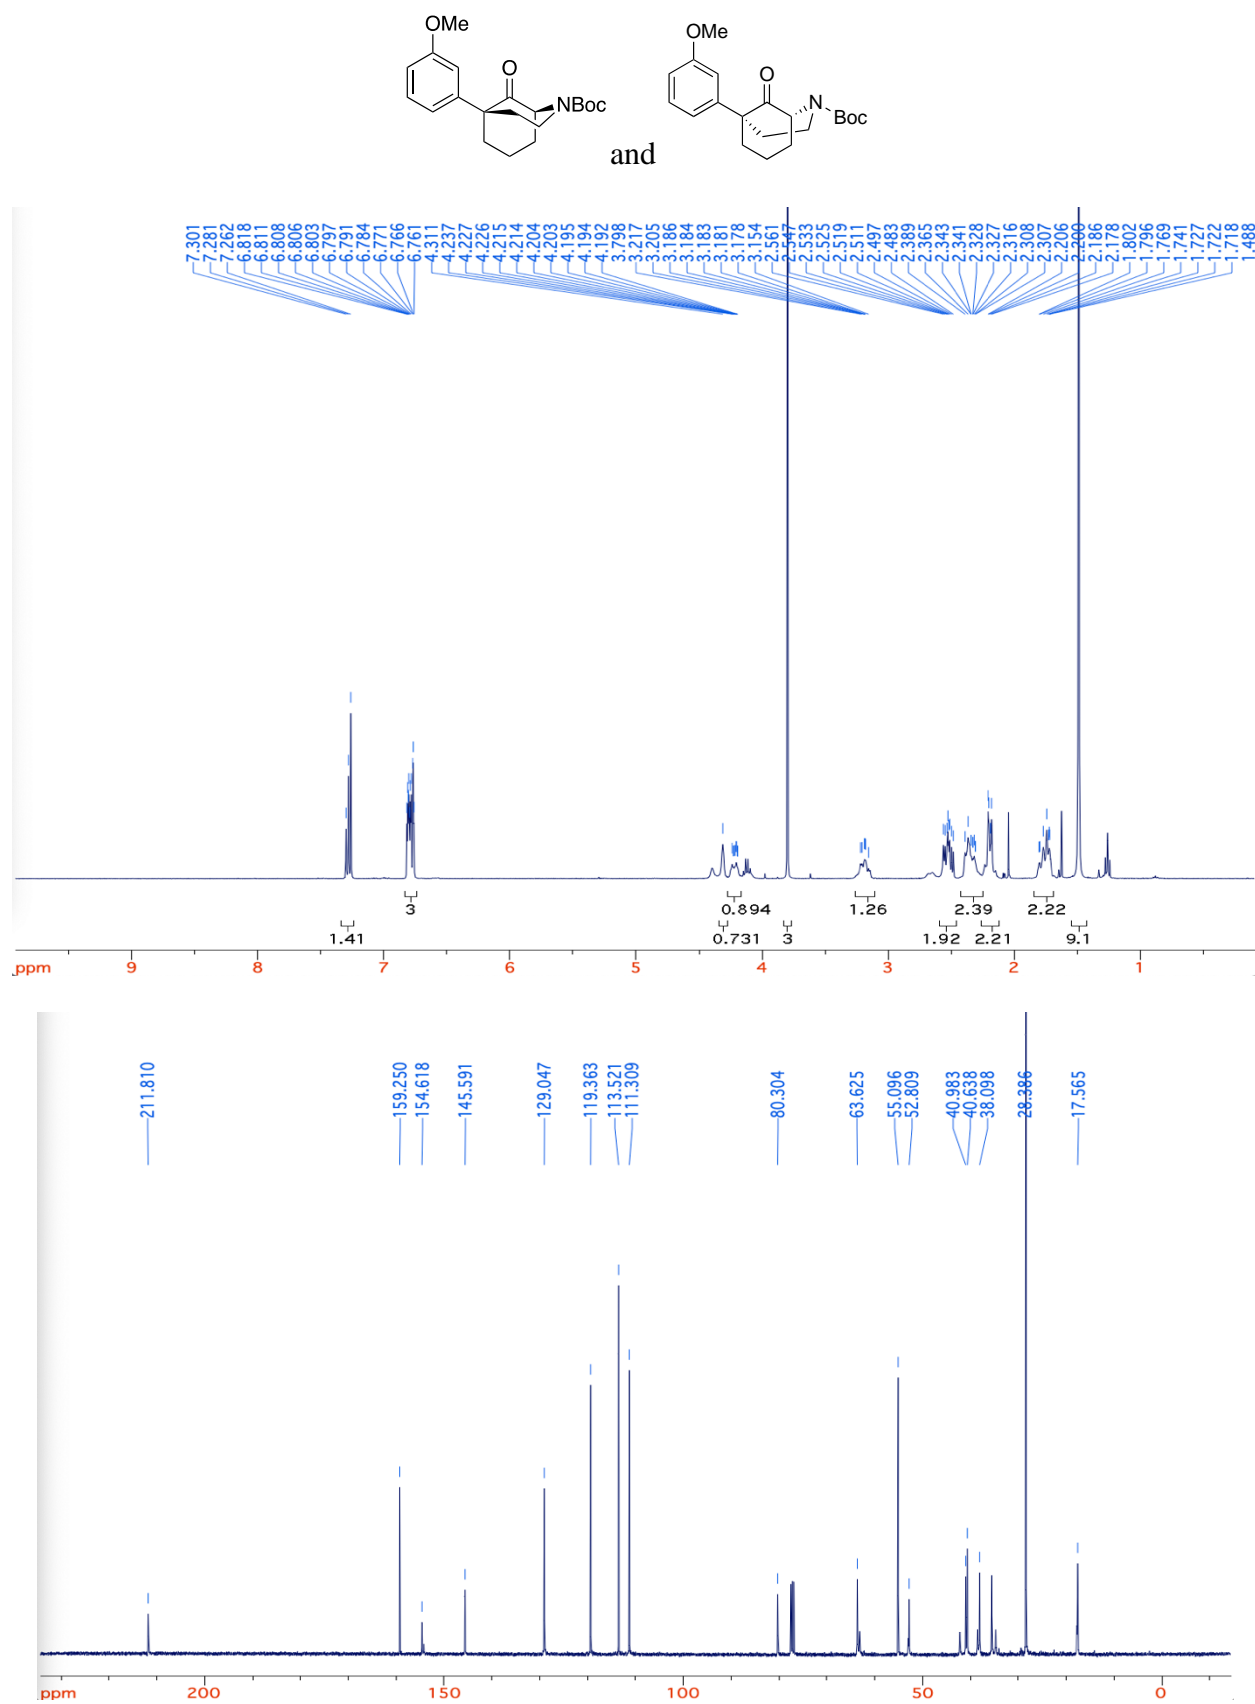

**Figure S15.** <sup>1</sup>H NMR and <sup>13</sup>C NMR of 1*S*,5*S*-**25** and 1*R*,5*R*-**30**

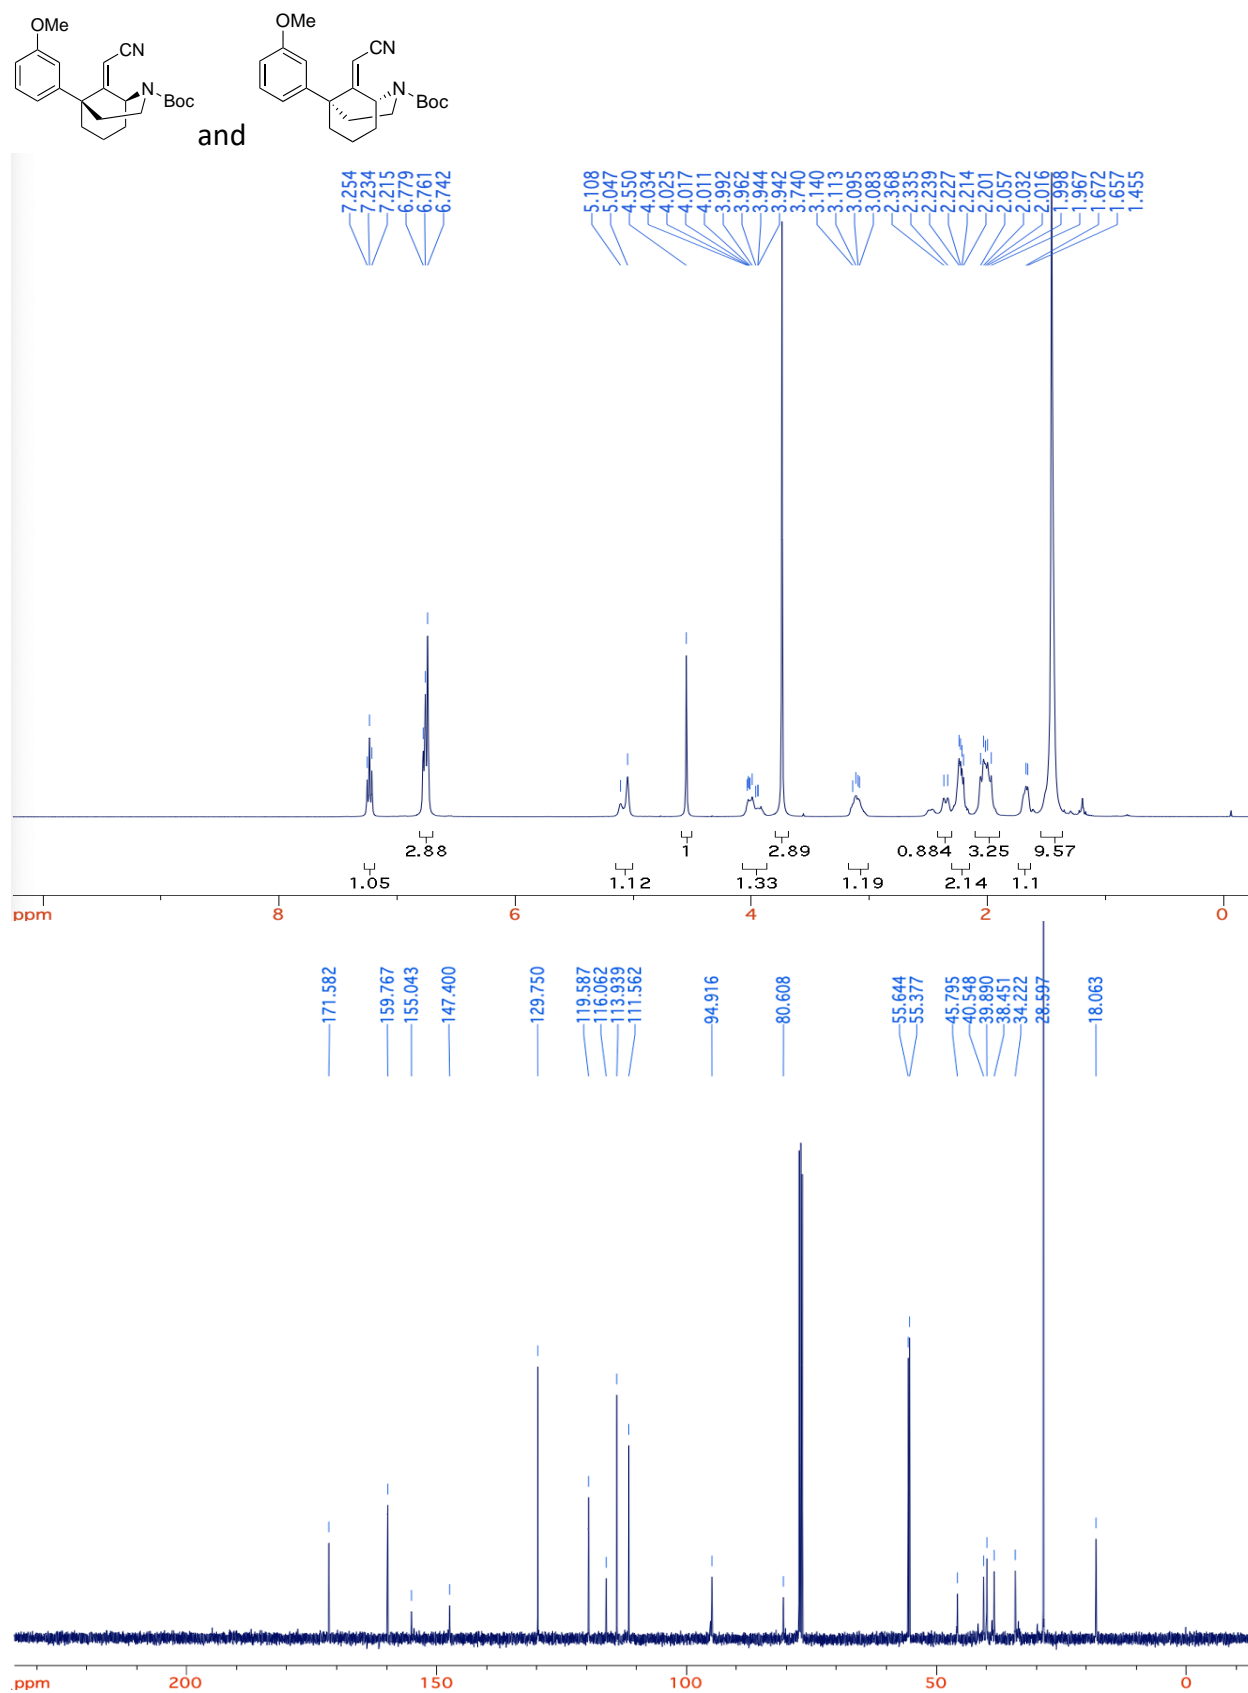

**Figure S16.** <sup>1</sup>H NMR and <sup>13</sup>C NMR of *1S,5S*-26 and *1R,5R*-31

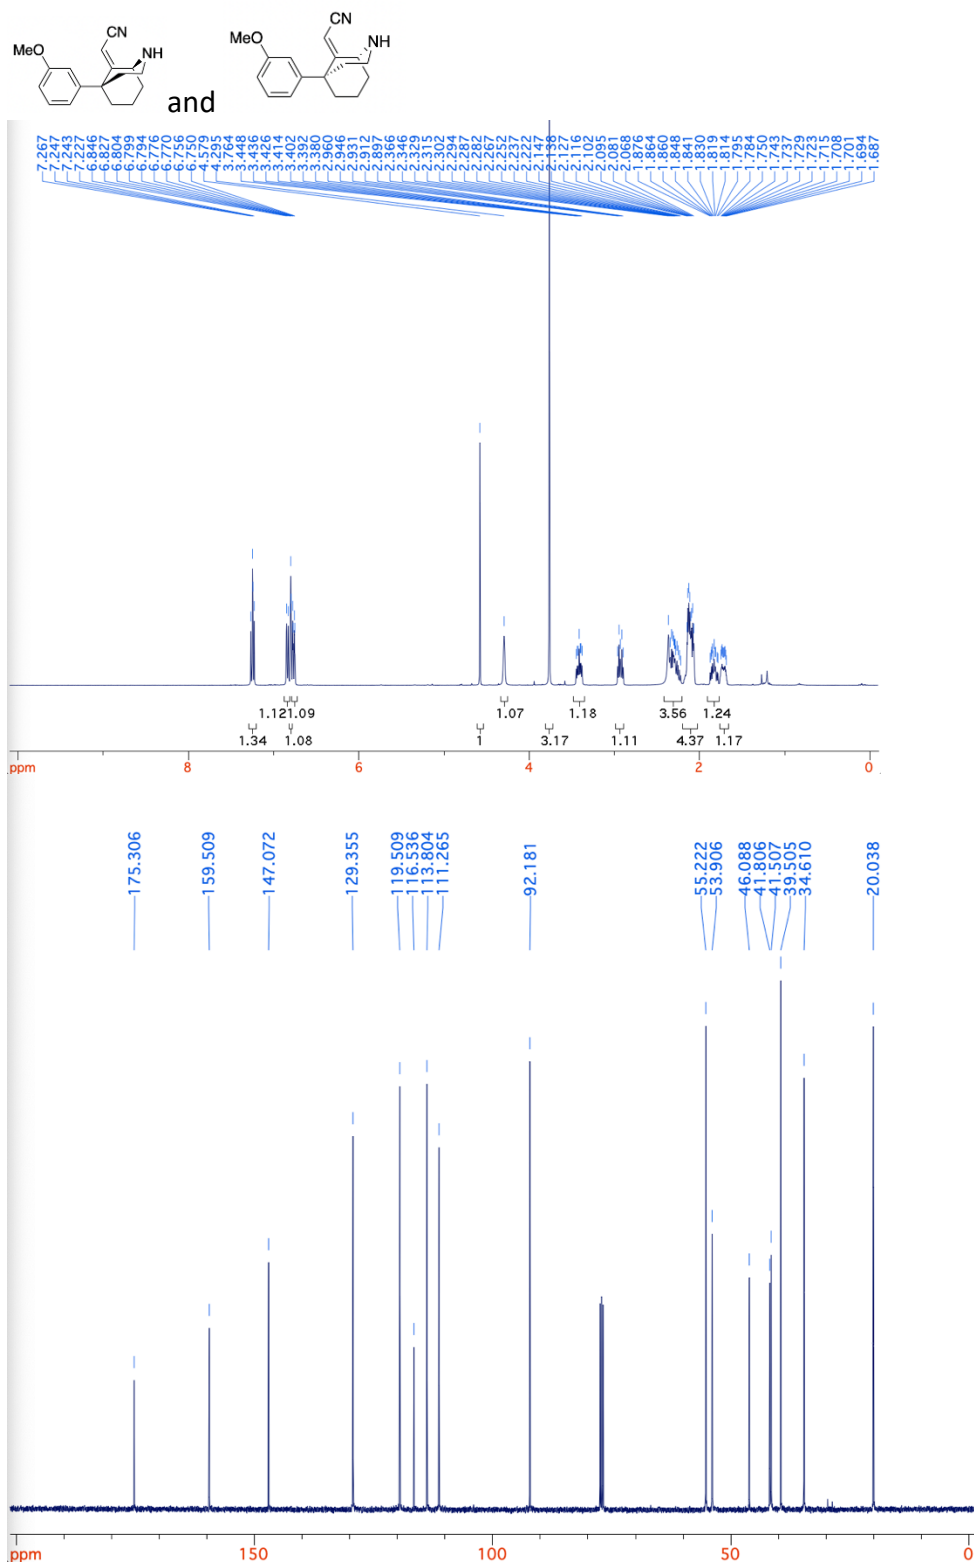

**Figure S17.** <sup>1</sup>H NMR and <sup>13</sup>C NMR of intermediate secondary amines towards **1*S*,5*S*-27** and **1*R*,5*R*-32**

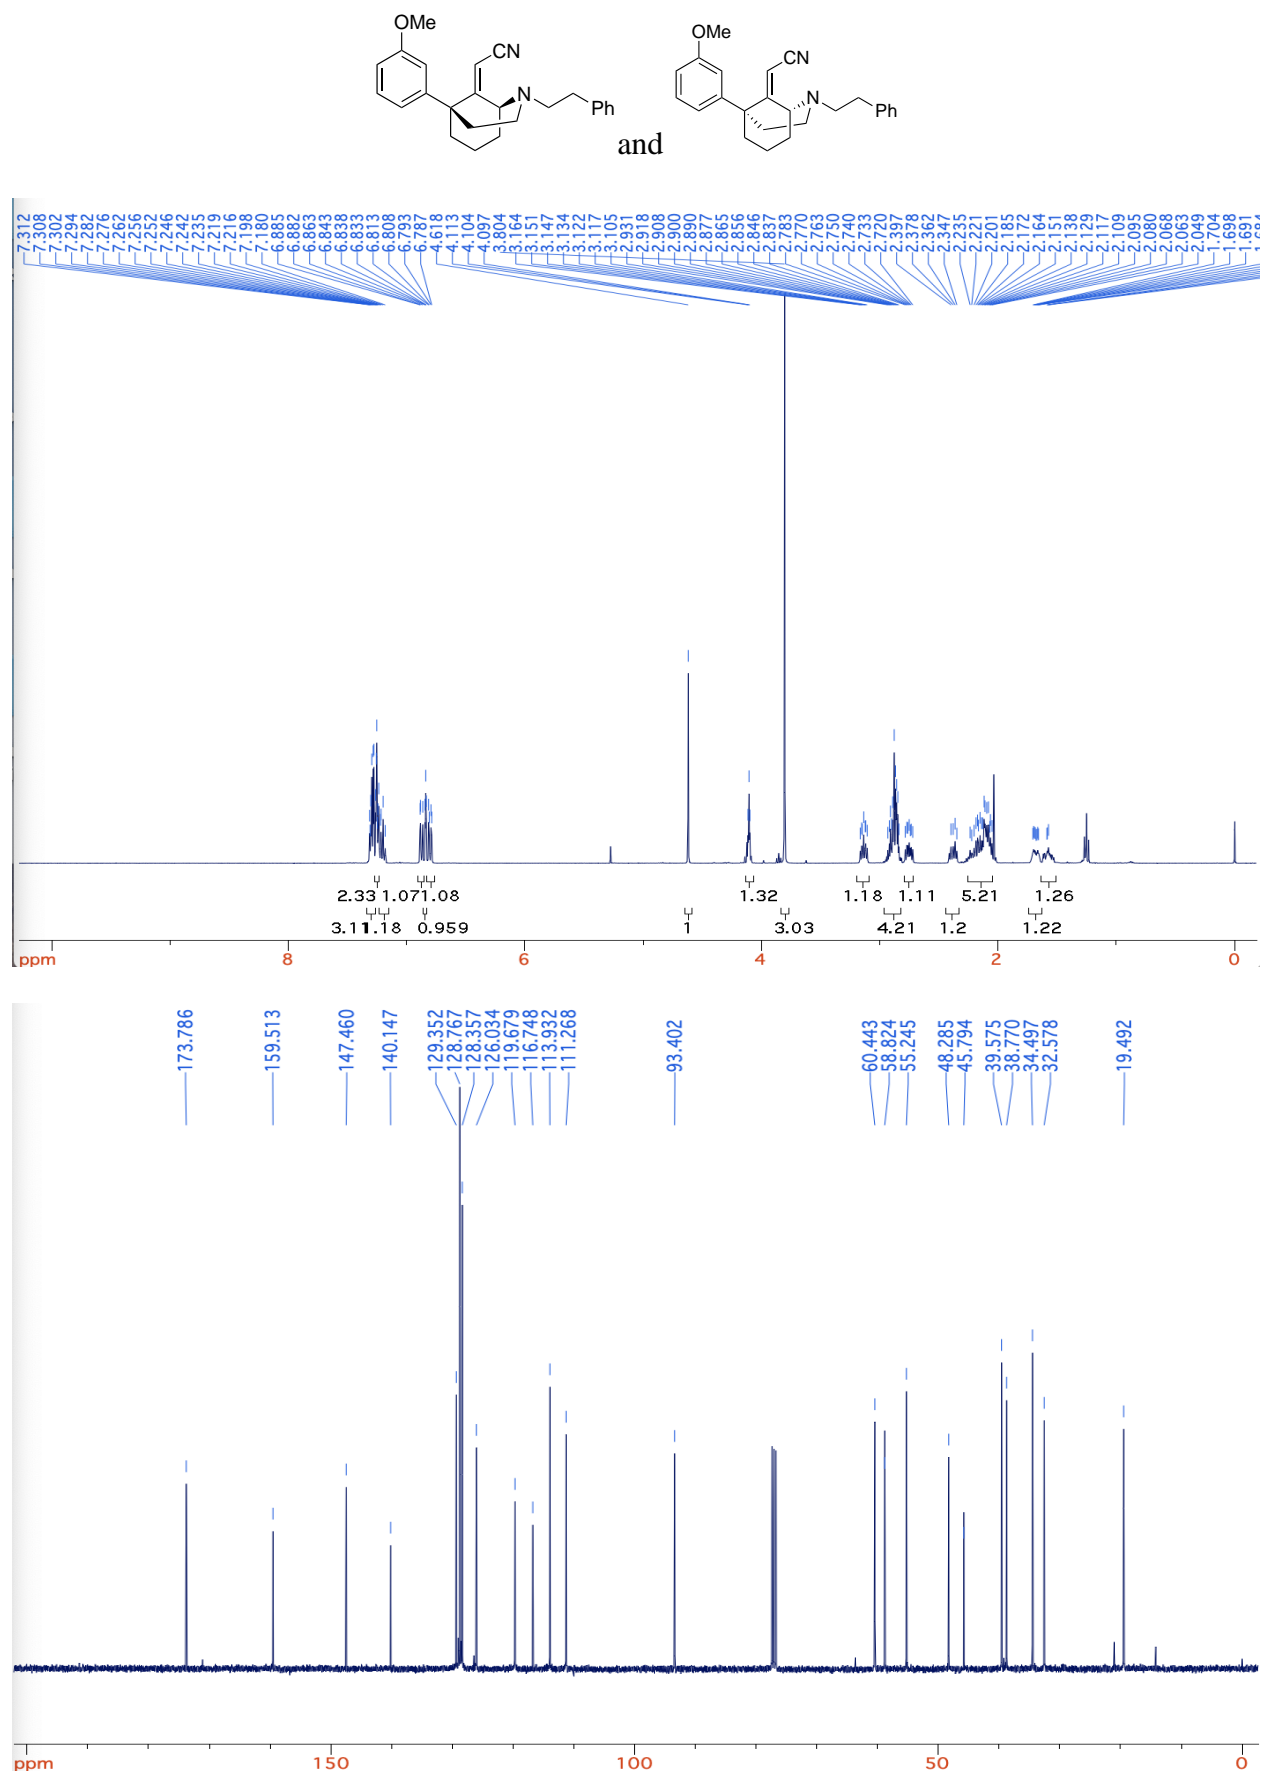

**Figure S18.**  $^1\text{H}$  NMR and  $^{13}\text{C}$  NMR of 1*S*,5*S*-27 and 1*R*,5*R*-32

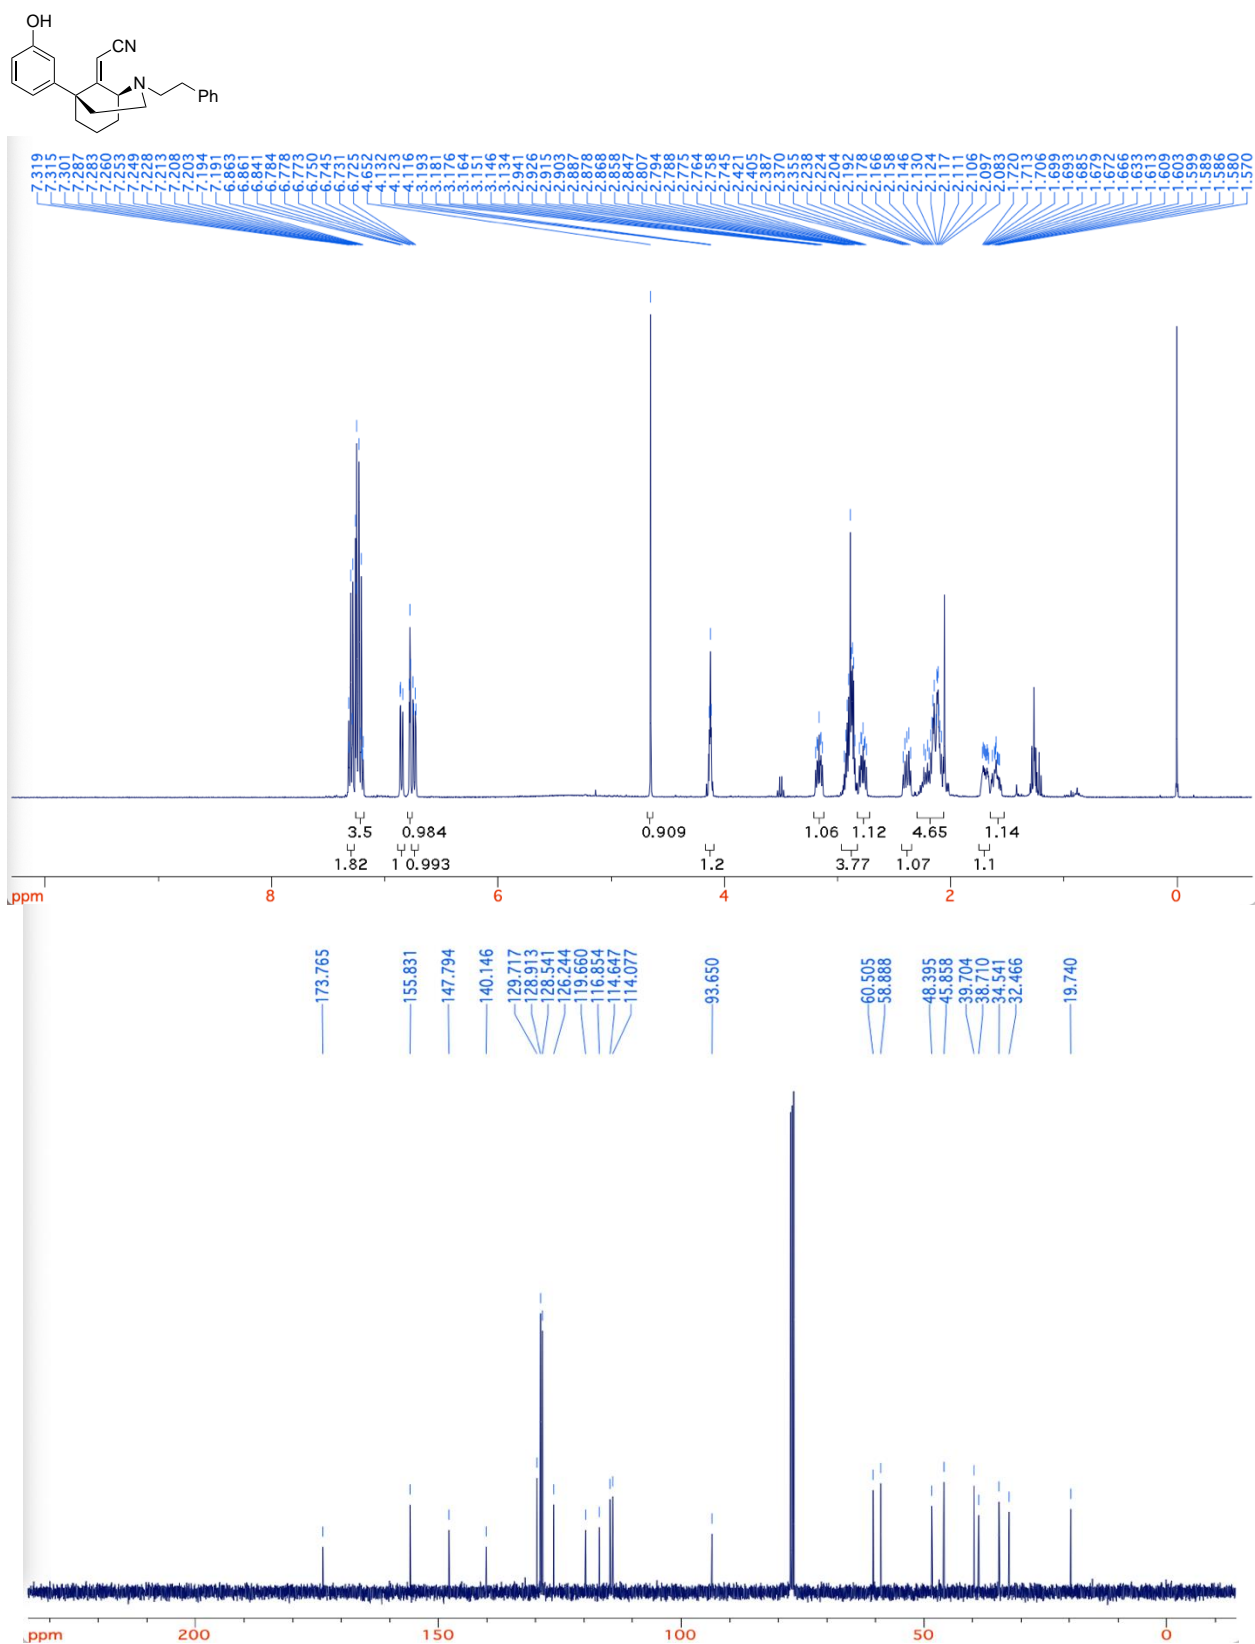

**Figure S19.**  $^1\text{H}$  NMR and  $^{13}\text{C}$  NMR of 1*S*,5*S*-28



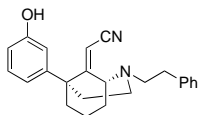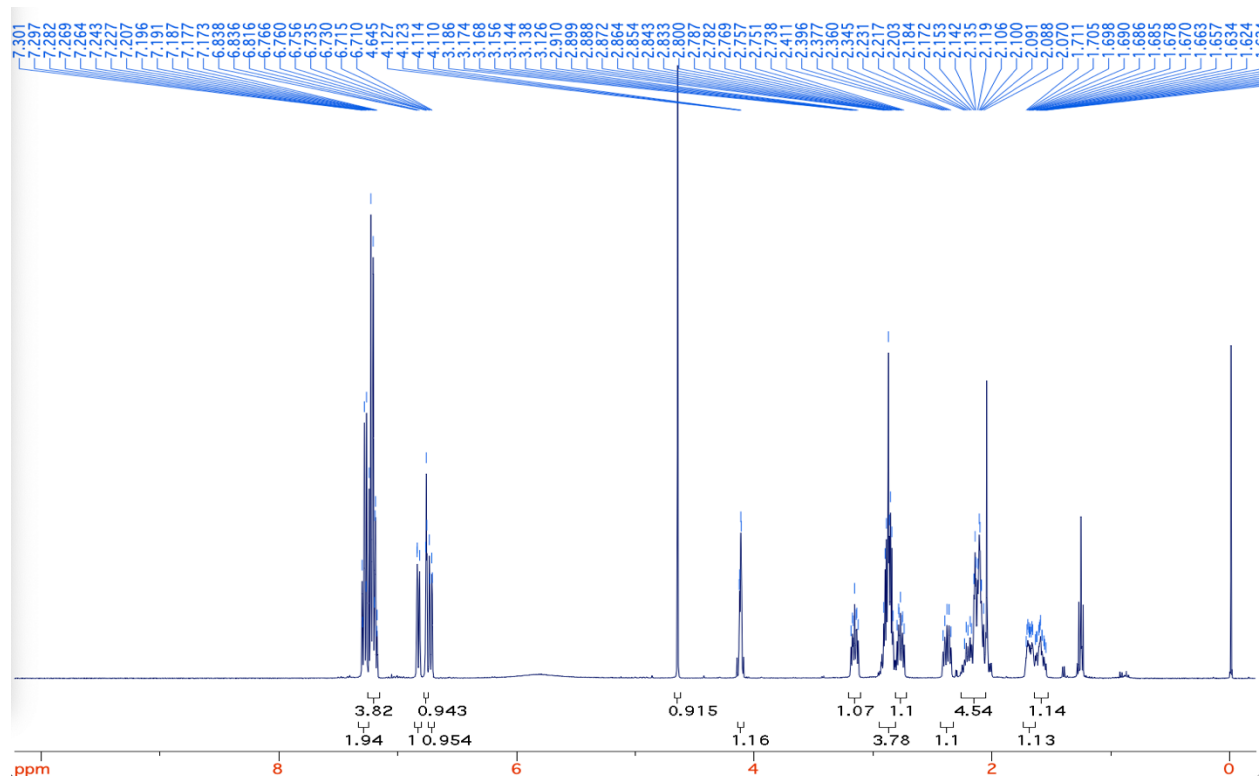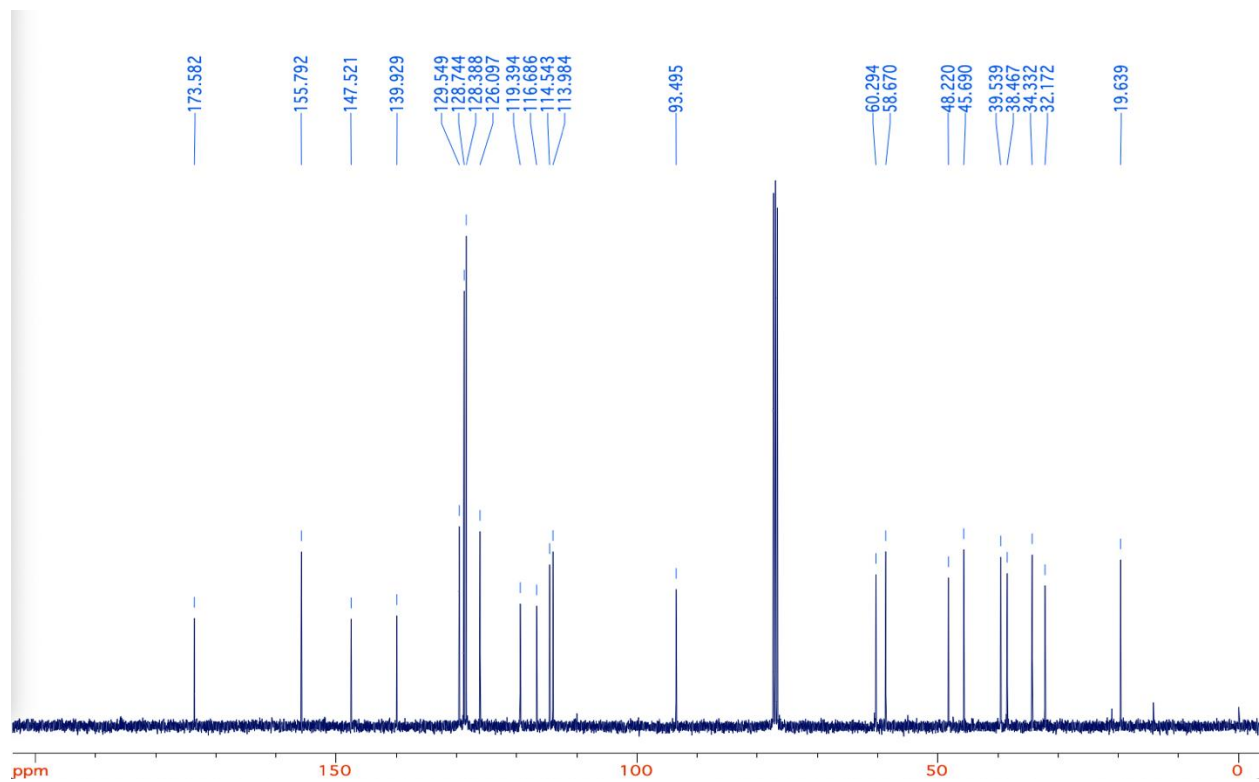

**Figure S20.** <sup>1</sup>H NMR and <sup>13</sup>C NMR of 1R,5R-33

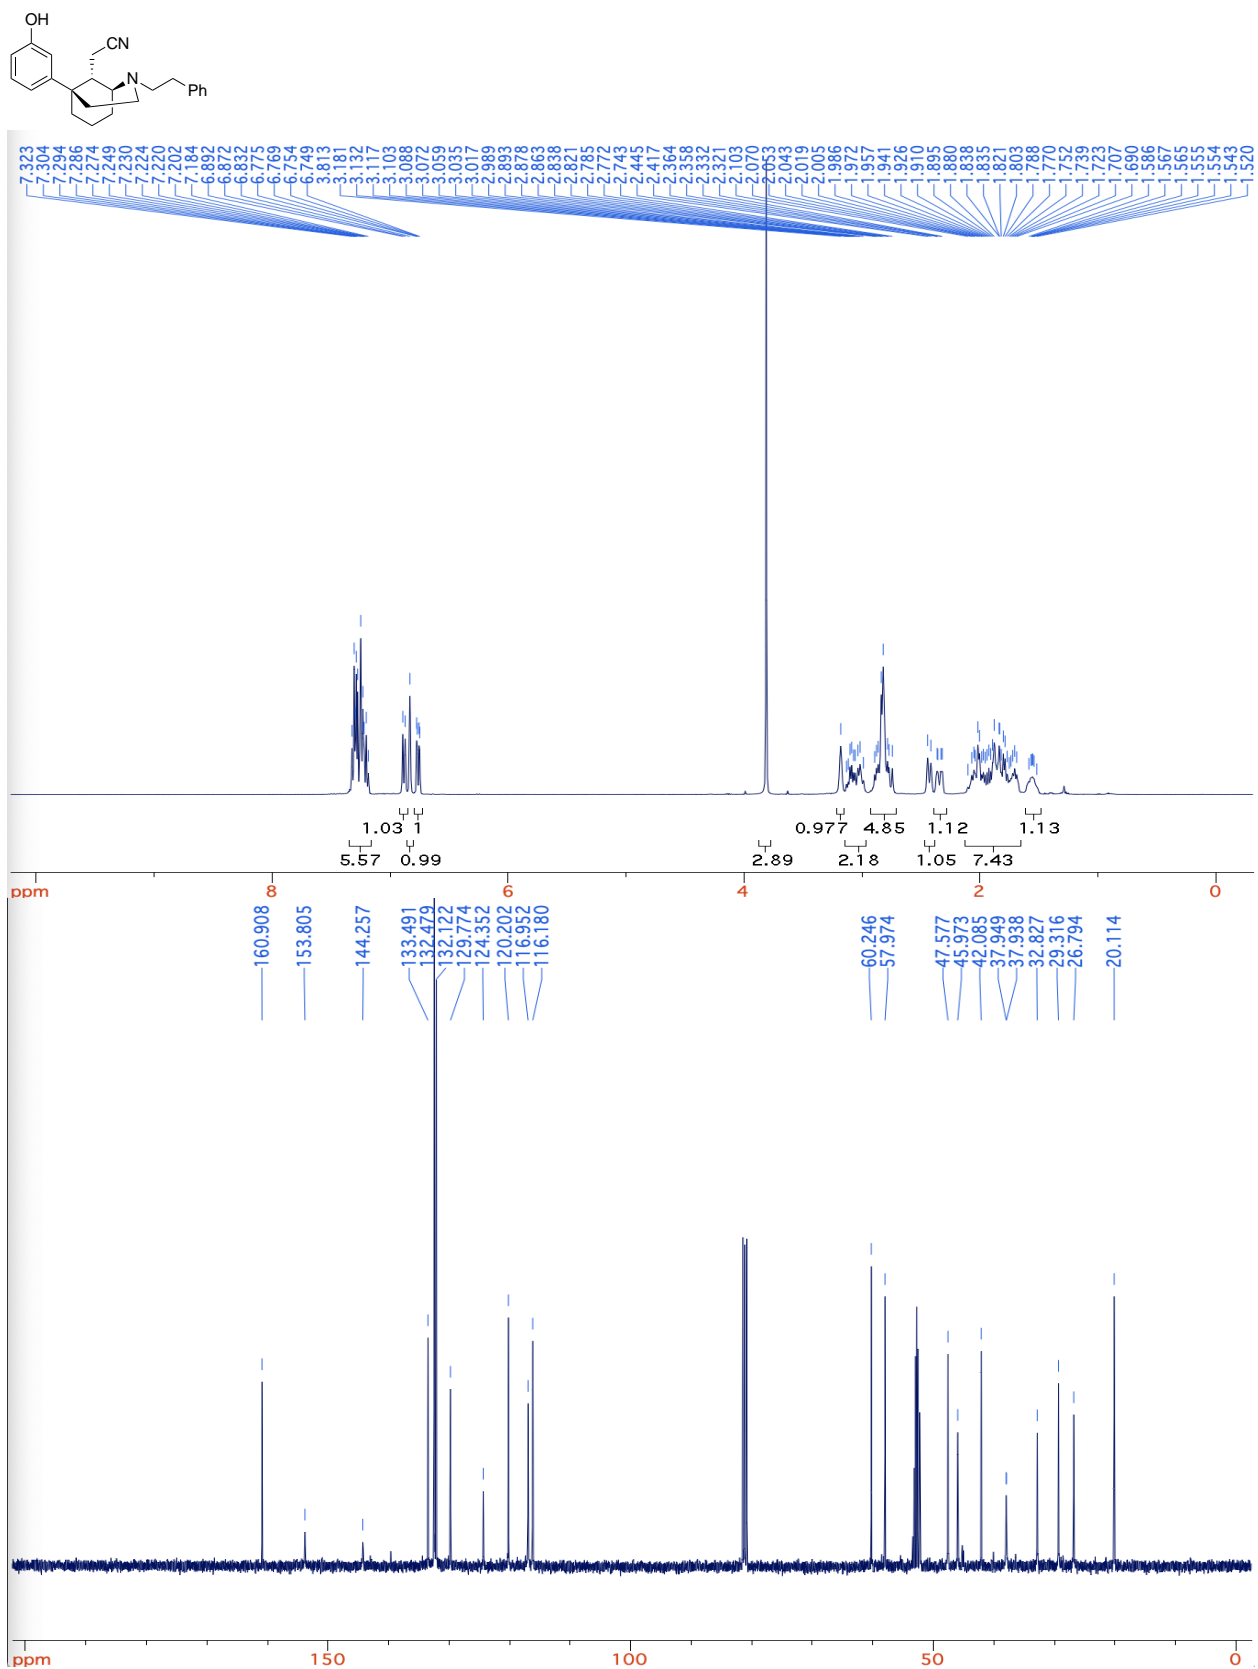

**Figure S21.** <sup>1</sup>H NMR and <sup>13</sup>C NMR of 1S,5R-9S-34

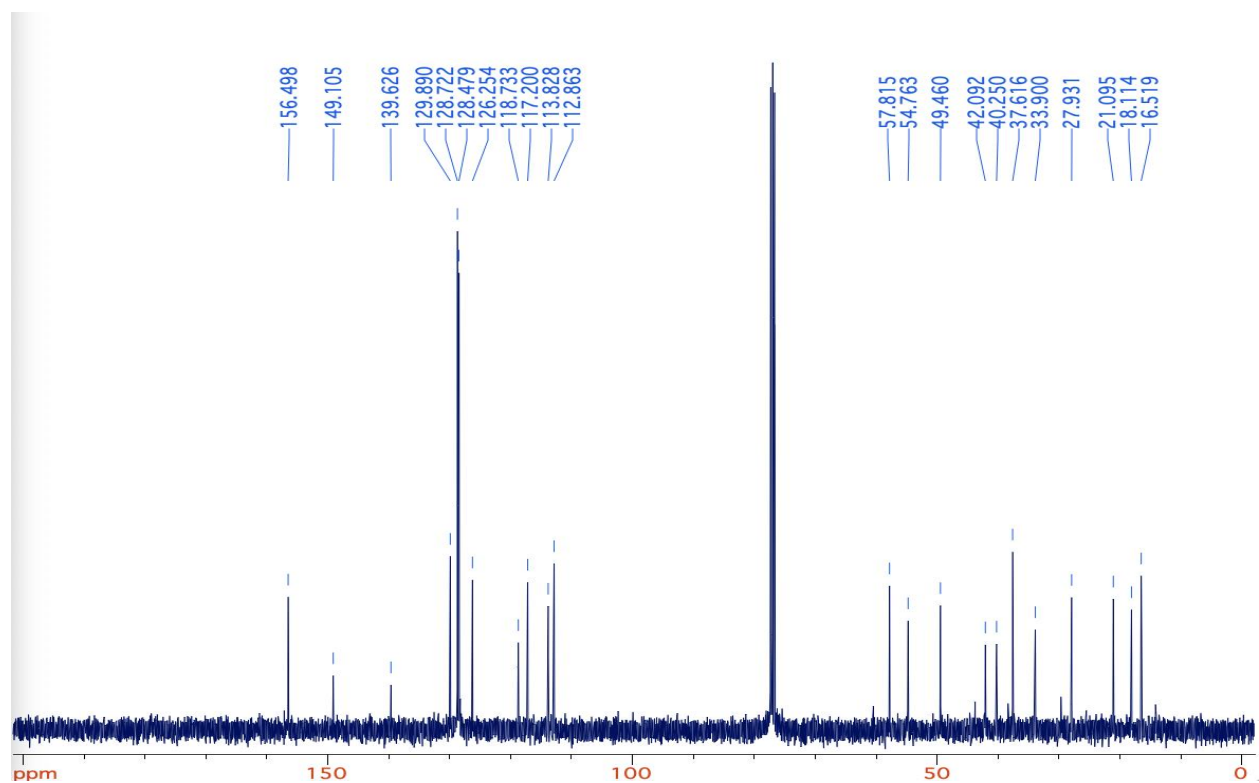

**Figure S22.**  $^1\text{H}$  NMR and  $^{13}\text{C}$  NMR of 1*R*,5*S*-9*R*-**35**

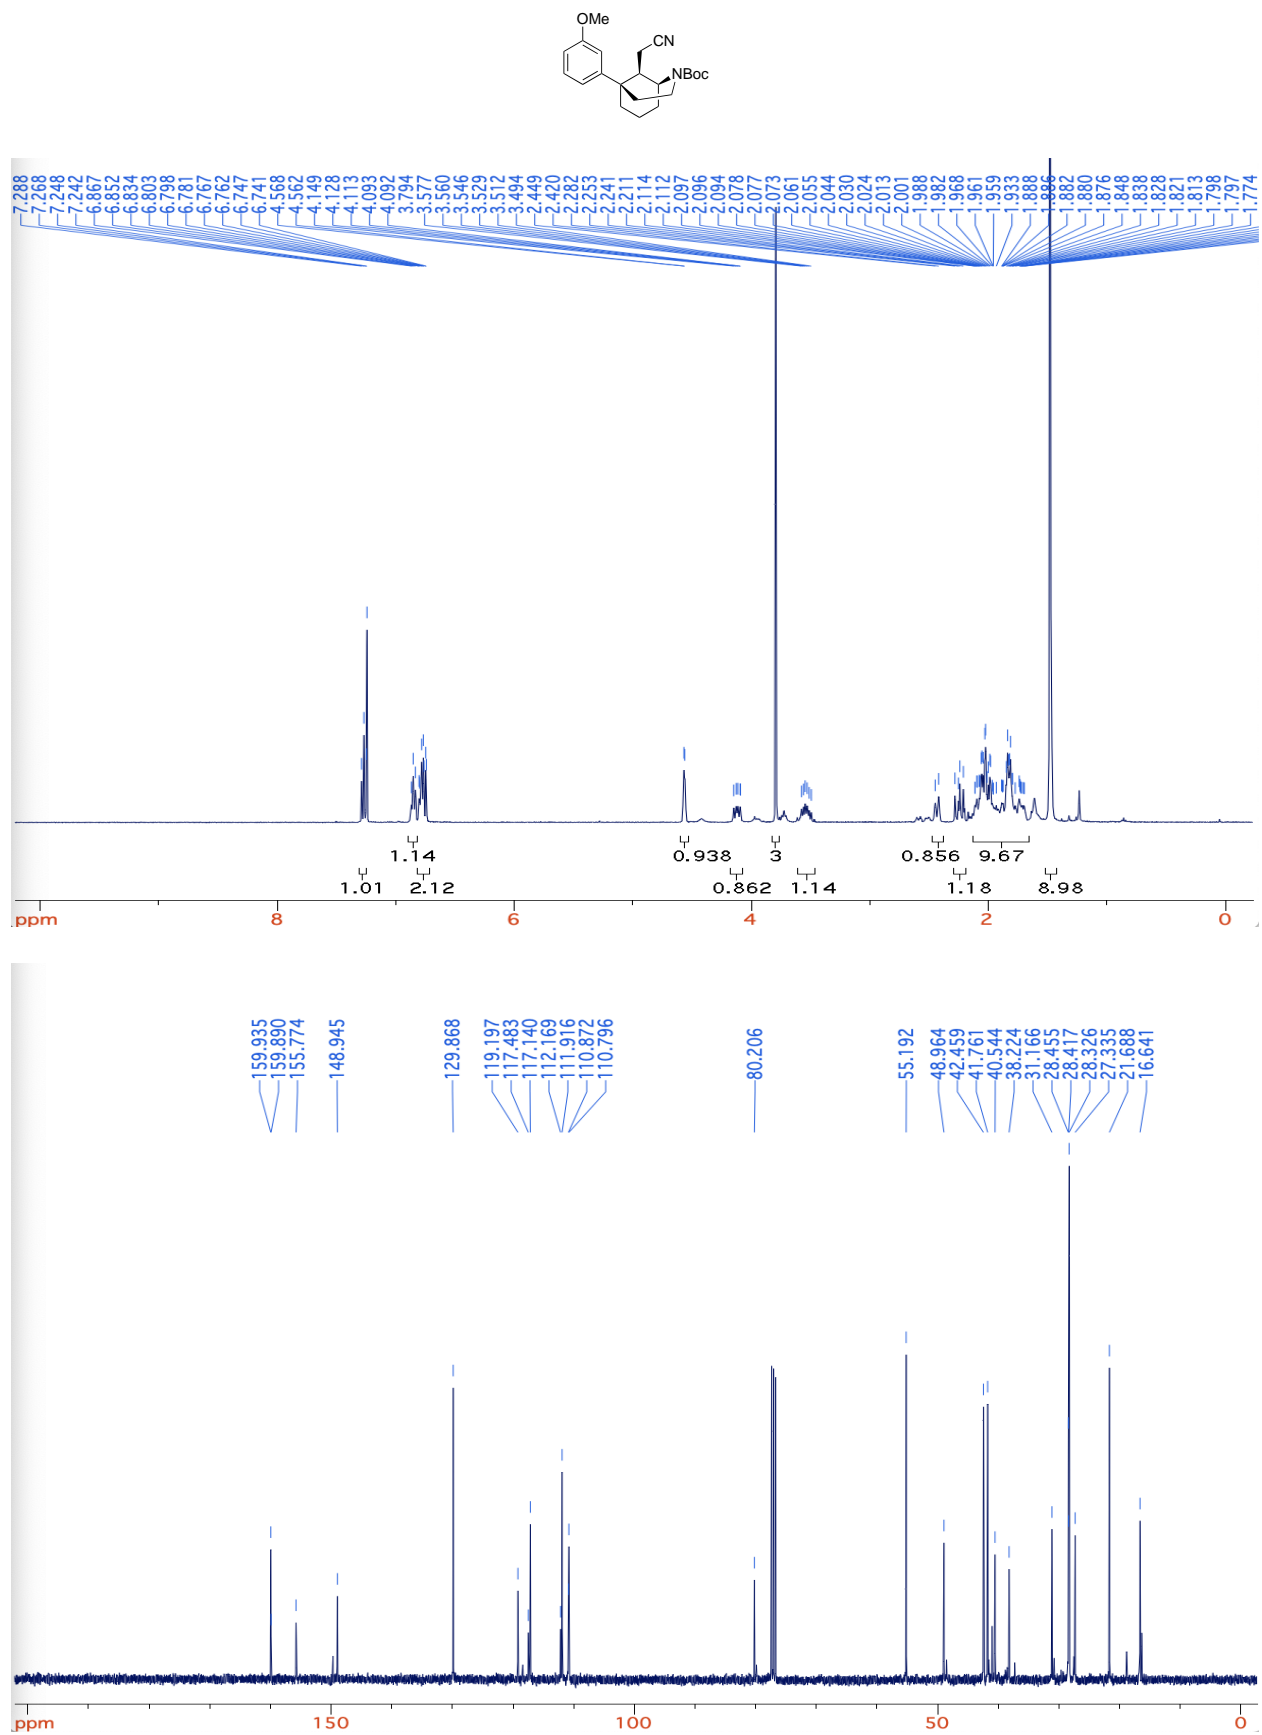

**Figure S23.** <sup>1</sup>H NMR and <sup>13</sup>C NMR of 1*S*,5*R*-9*R*-36

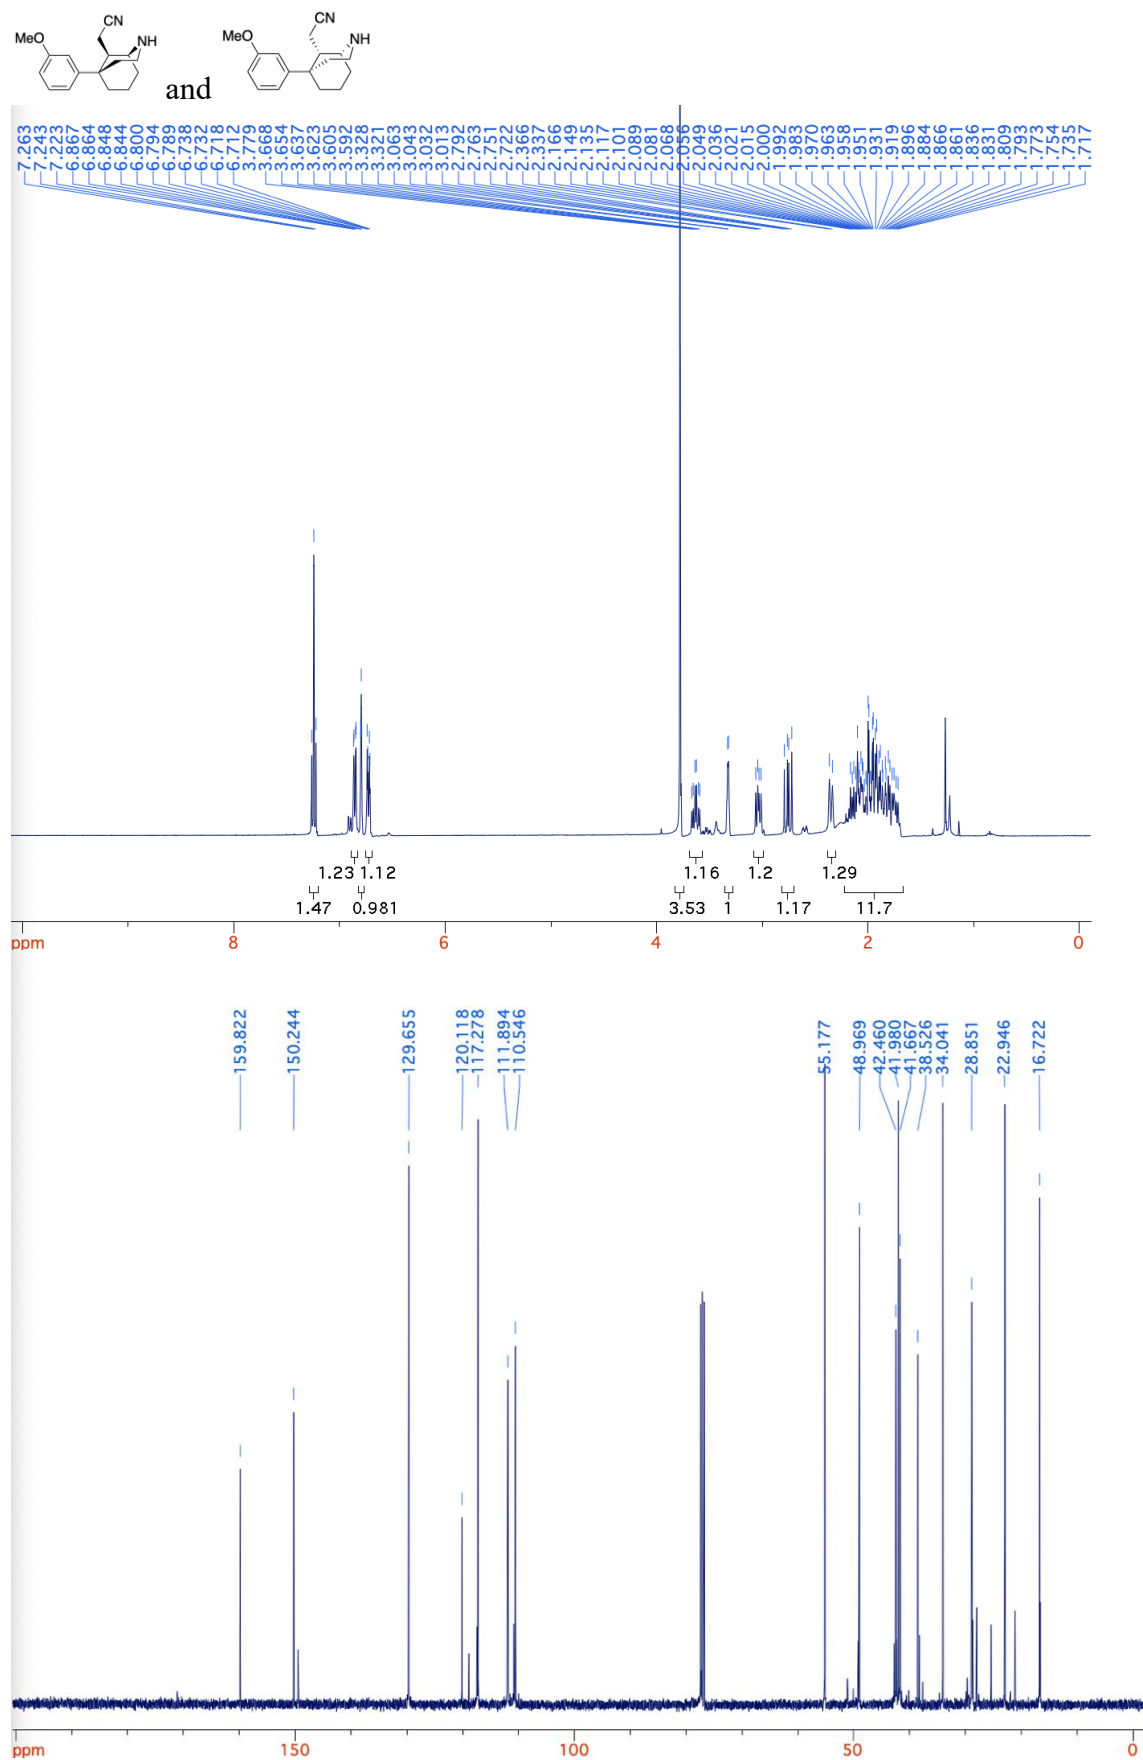

**Figure S24.** <sup>1</sup>H NMR and <sup>13</sup>C NMR of intermediate secondary amines towards *1S,5R,9R-37* and *1R,5S,9S-40*

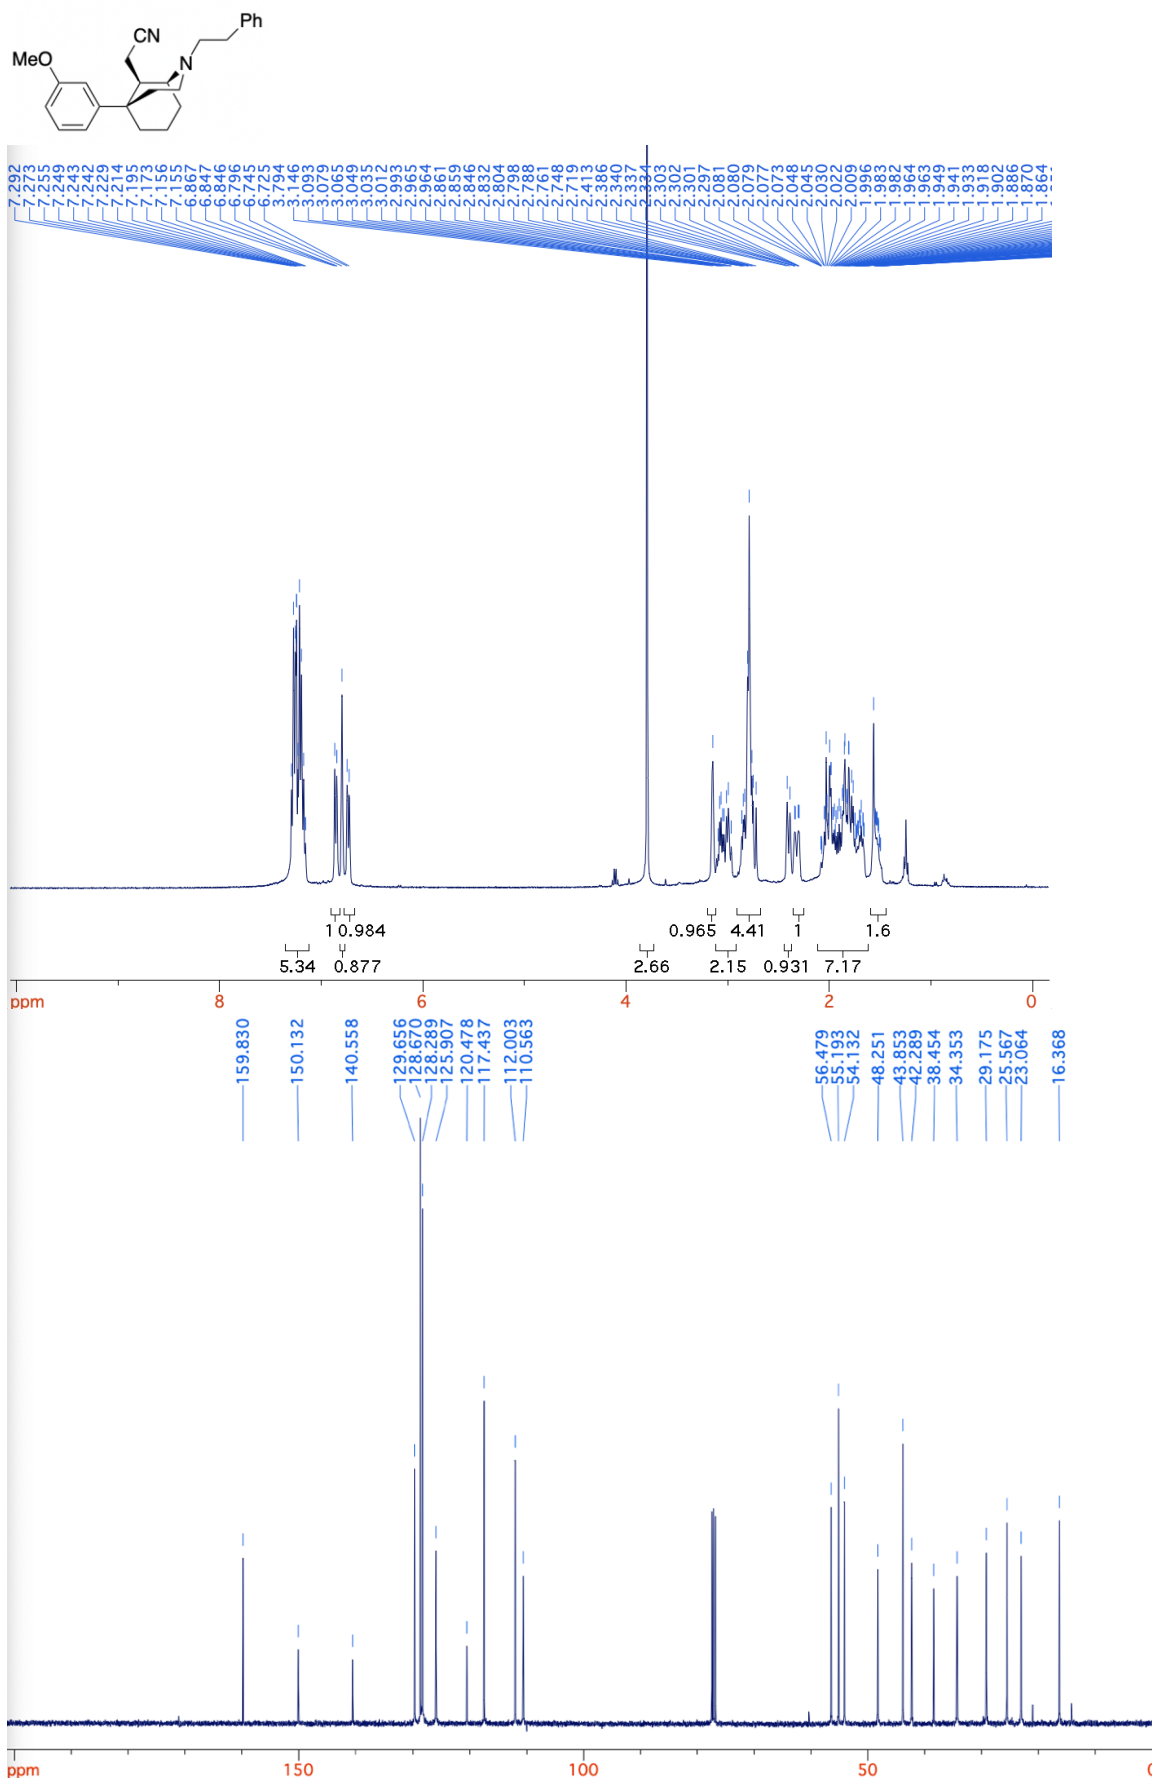

**Figure S25.** <sup>1</sup>H NMR and <sup>13</sup>C NMR of 1*S*,5*R*,9*R*-**37**

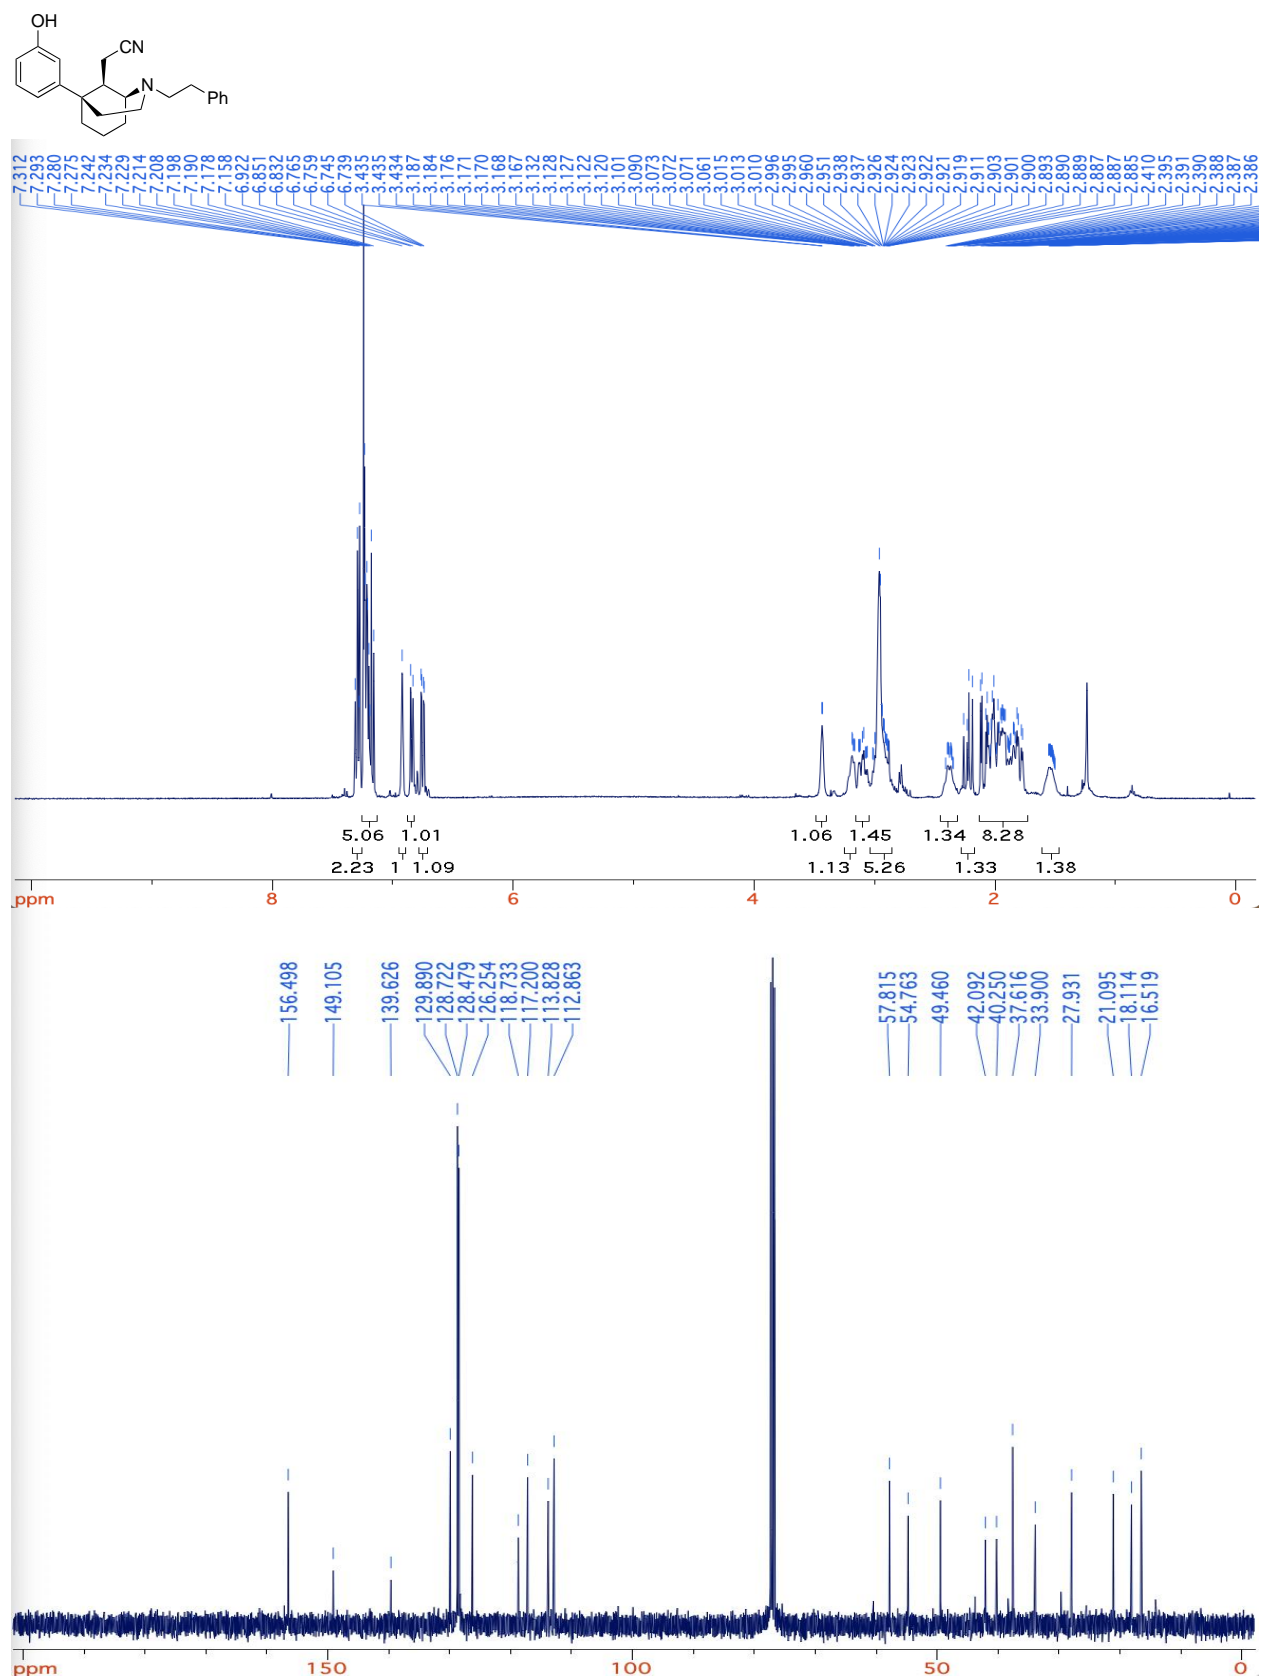

**Figure S26.** <sup>1</sup>H NMR and <sup>13</sup>C NMR of 1S,5R-9R-38

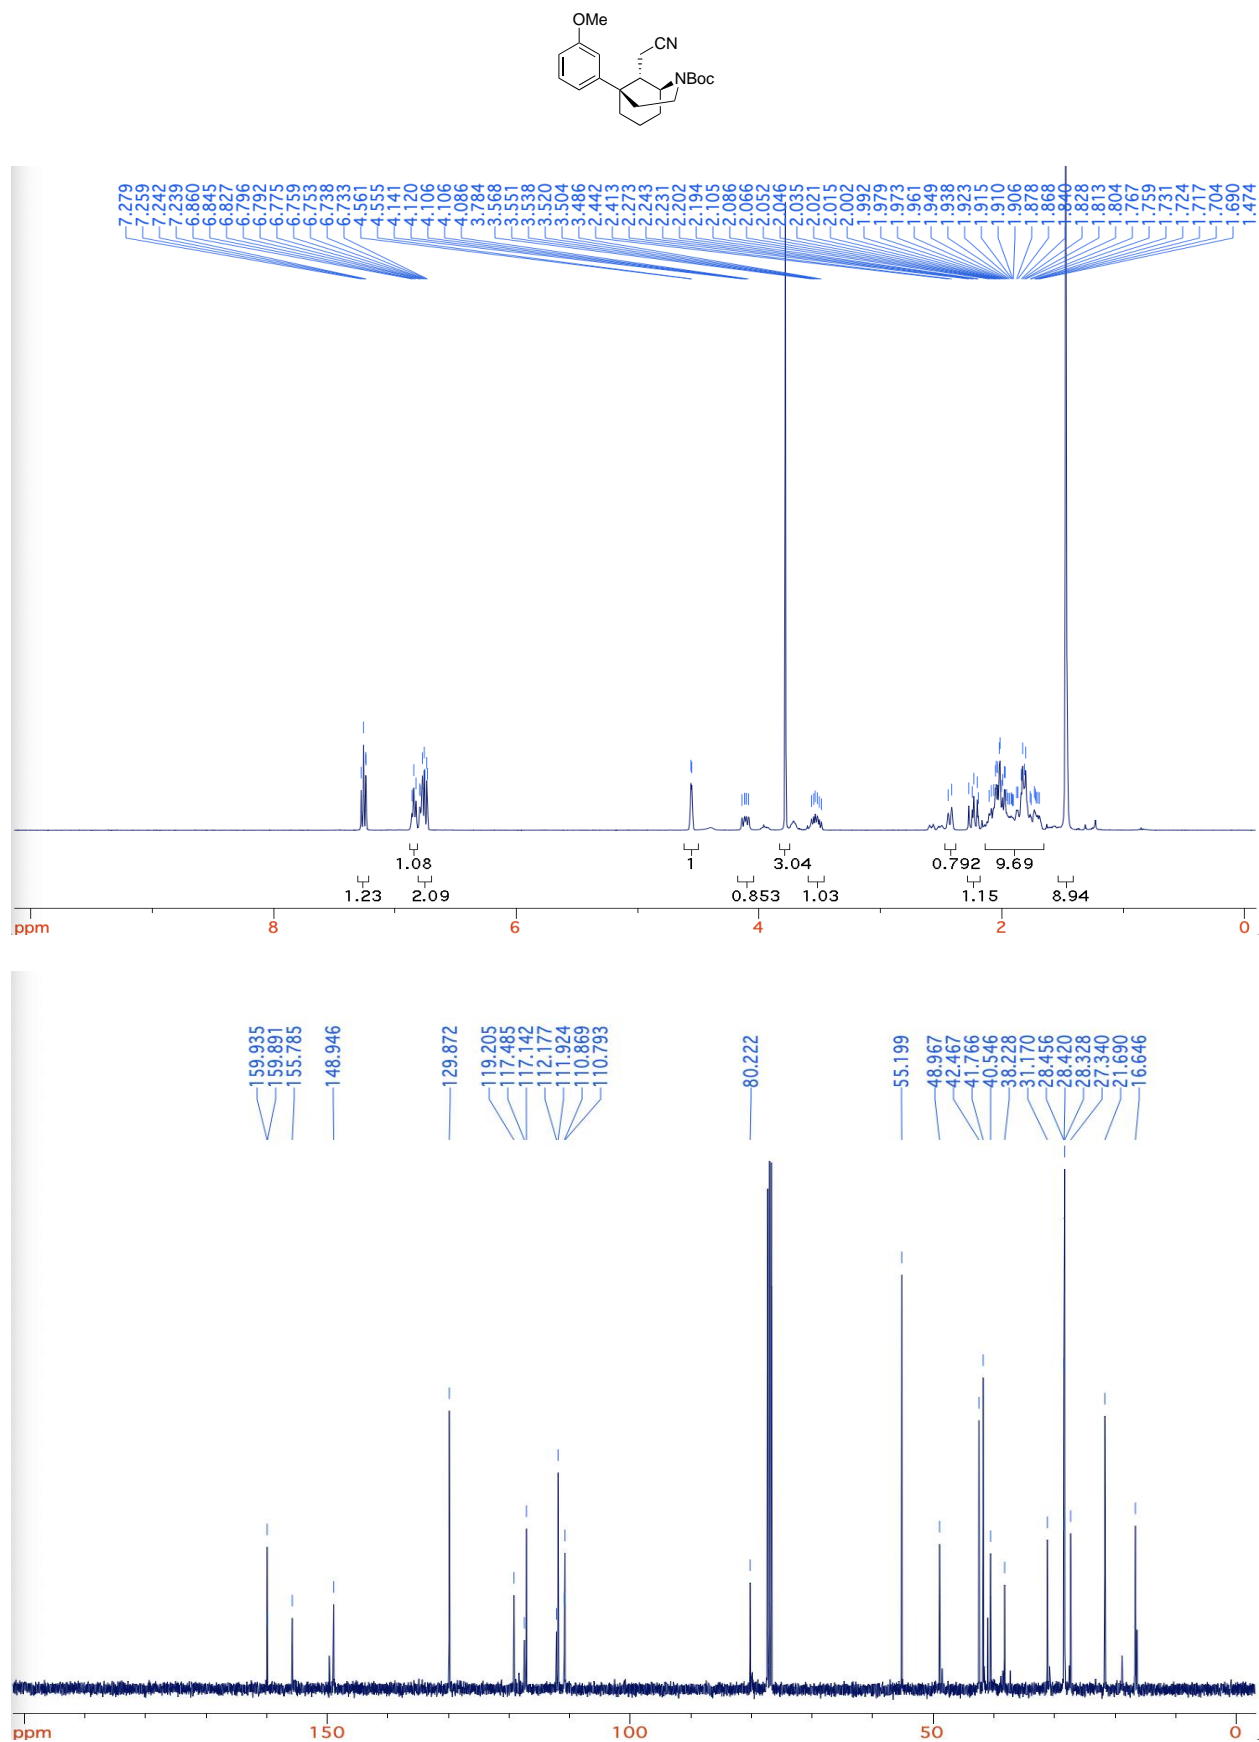

**Figure S27.** <sup>1</sup>H NMR and <sup>13</sup>C NMR of 1R,5S-9S-39



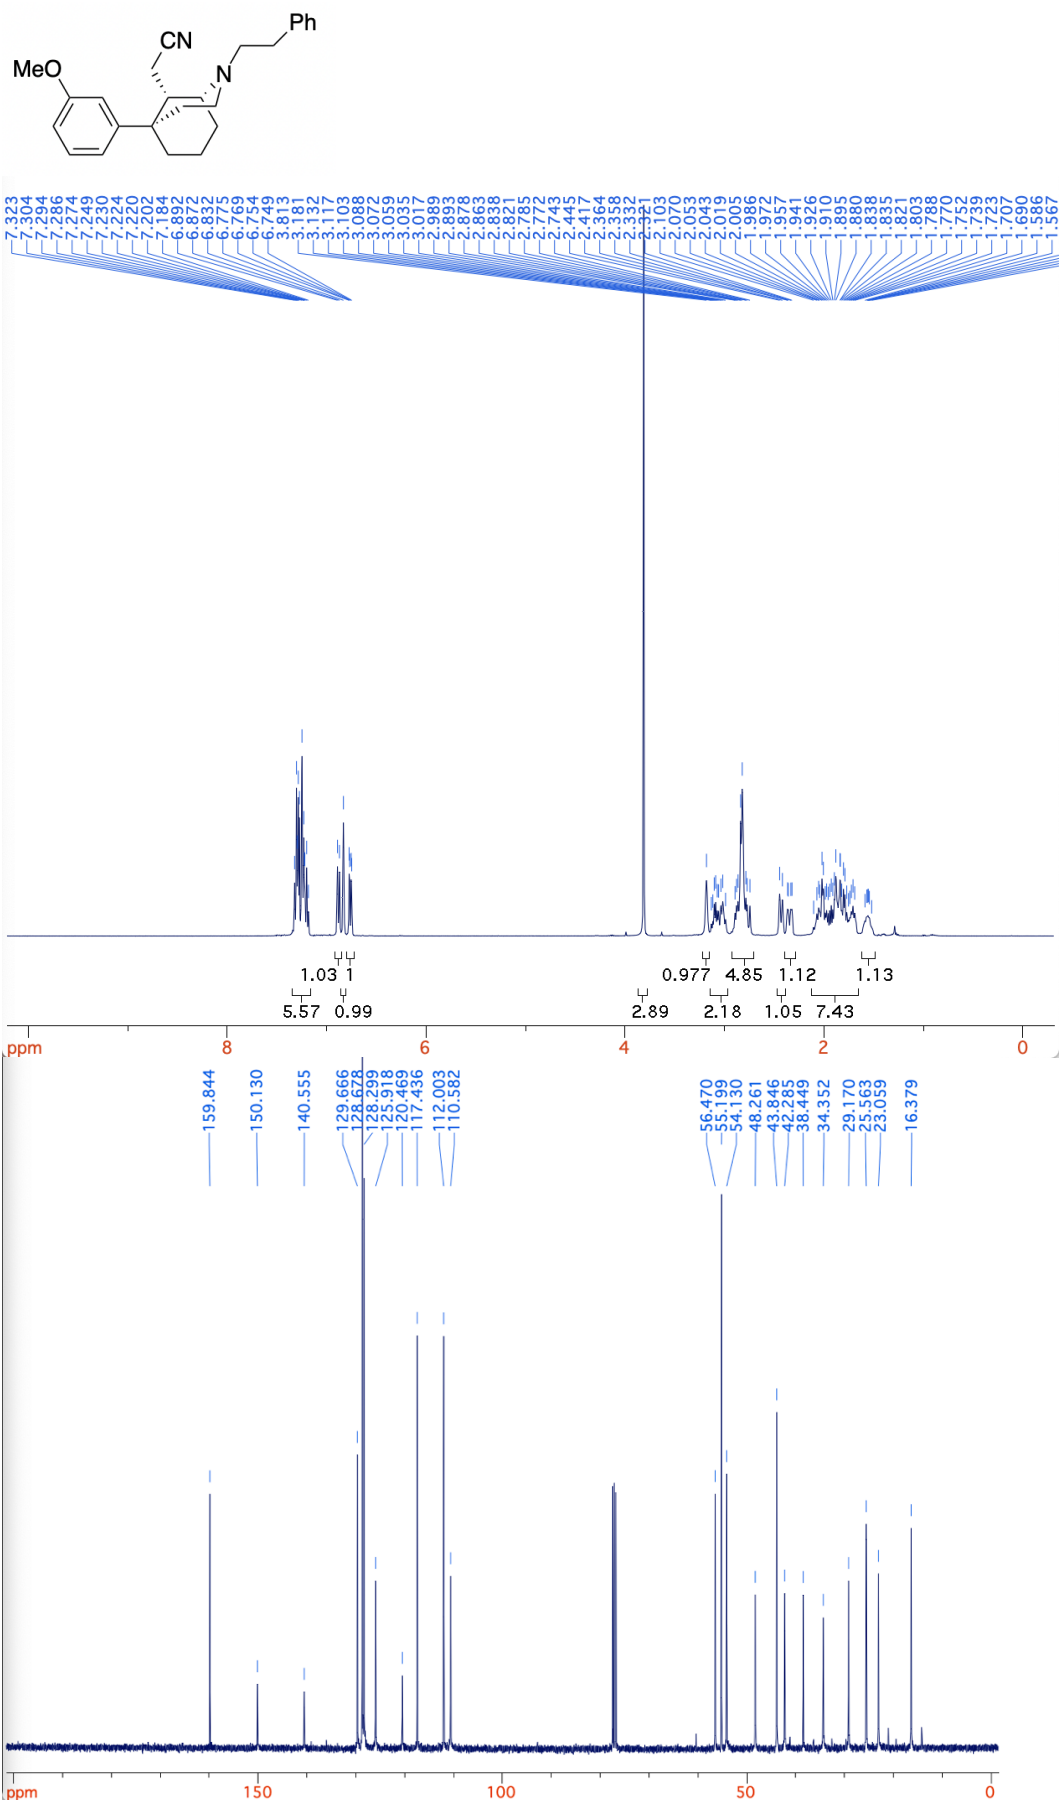

**Figure S28.** <sup>1</sup>H NMR and <sup>13</sup>C NMR of 1*R*,5*S*,9*S*-40

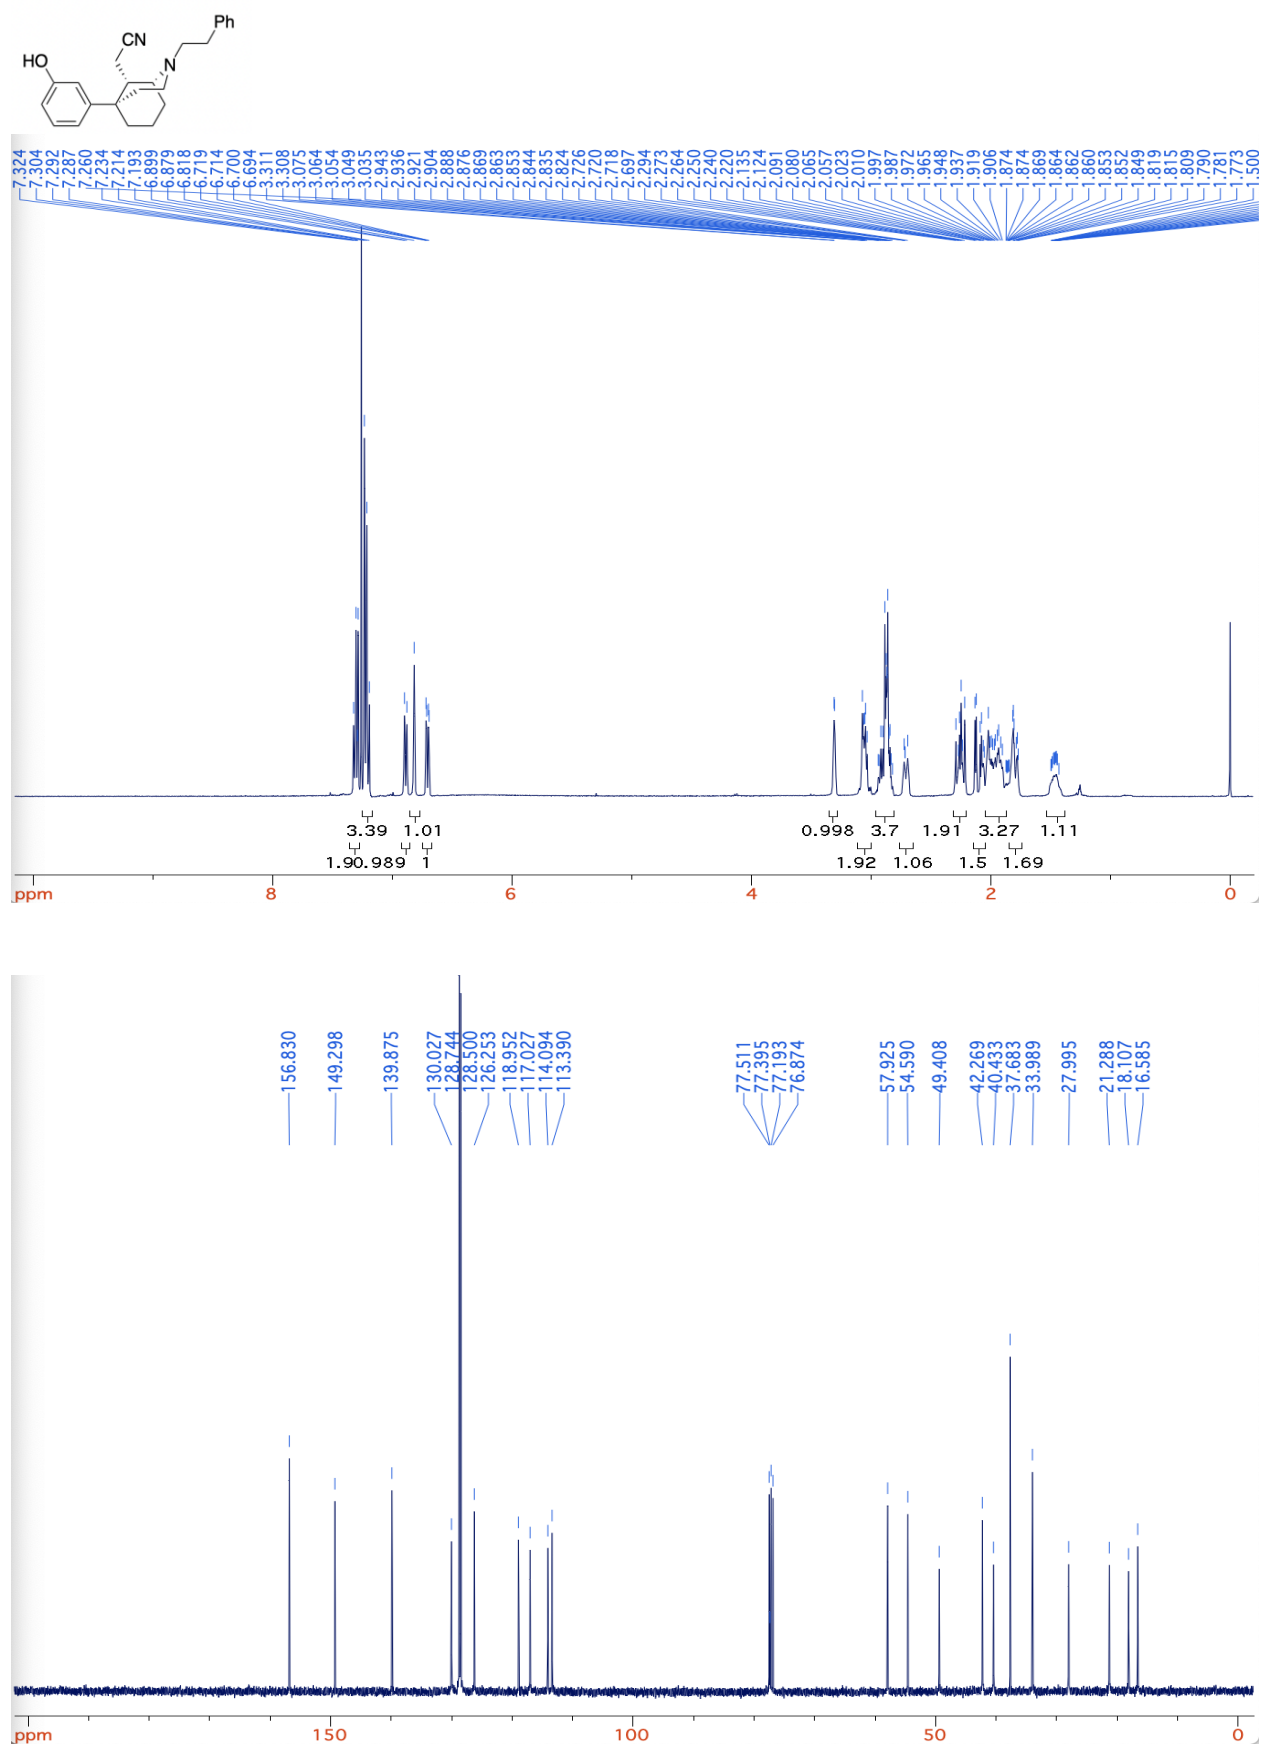

**Figure S29.** <sup>1</sup>H NMR and <sup>13</sup>C NMR of 1*R*,5*S*-9*S*-41

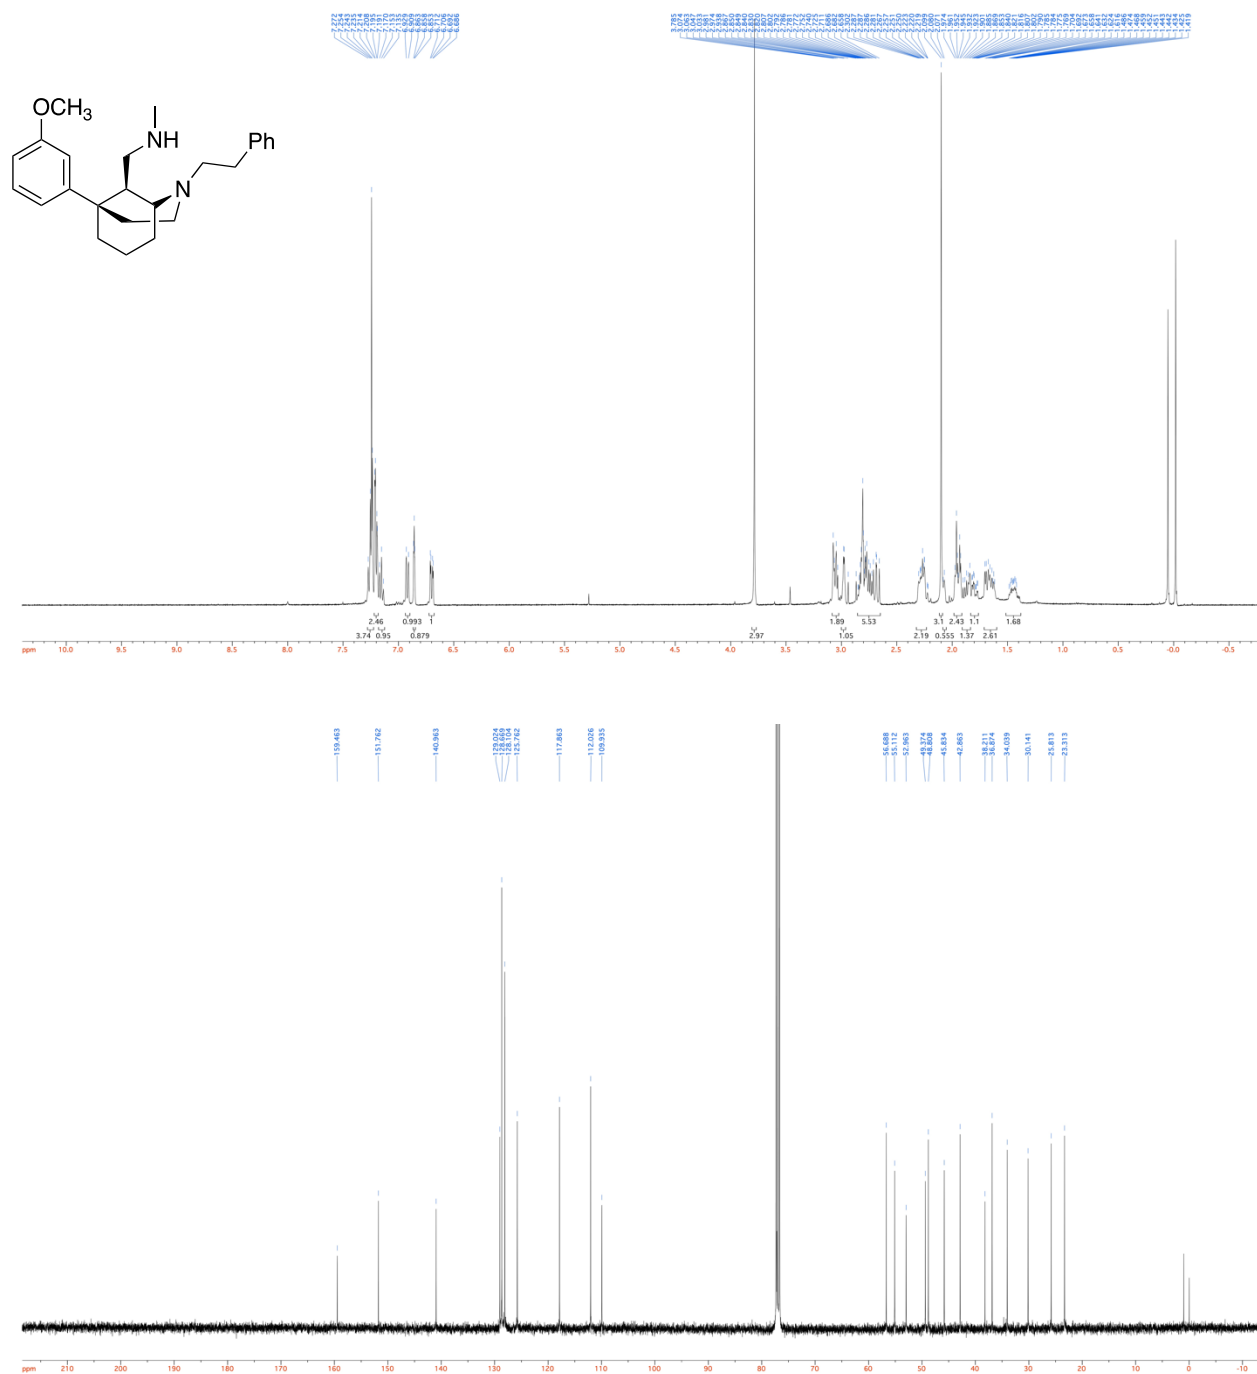

**Figure S30.** <sup>1</sup>H NMR and <sup>13</sup>C NMR of 1S,5R,9S-44

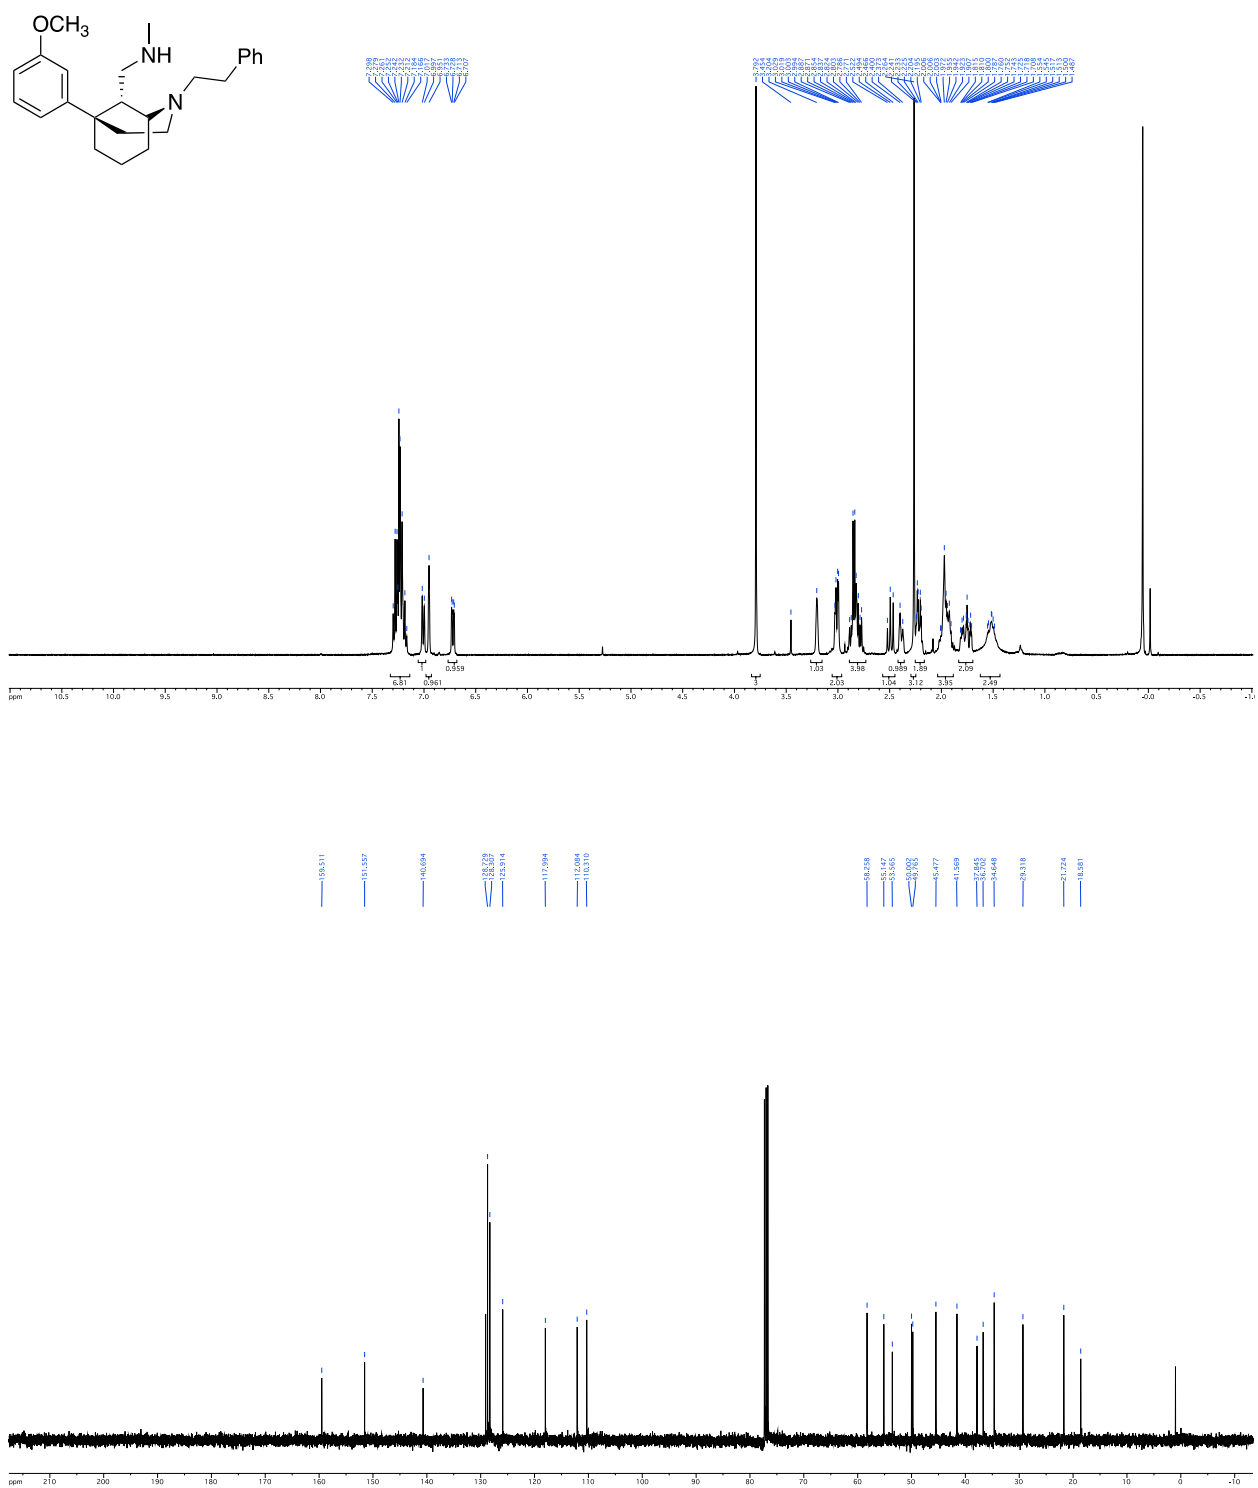

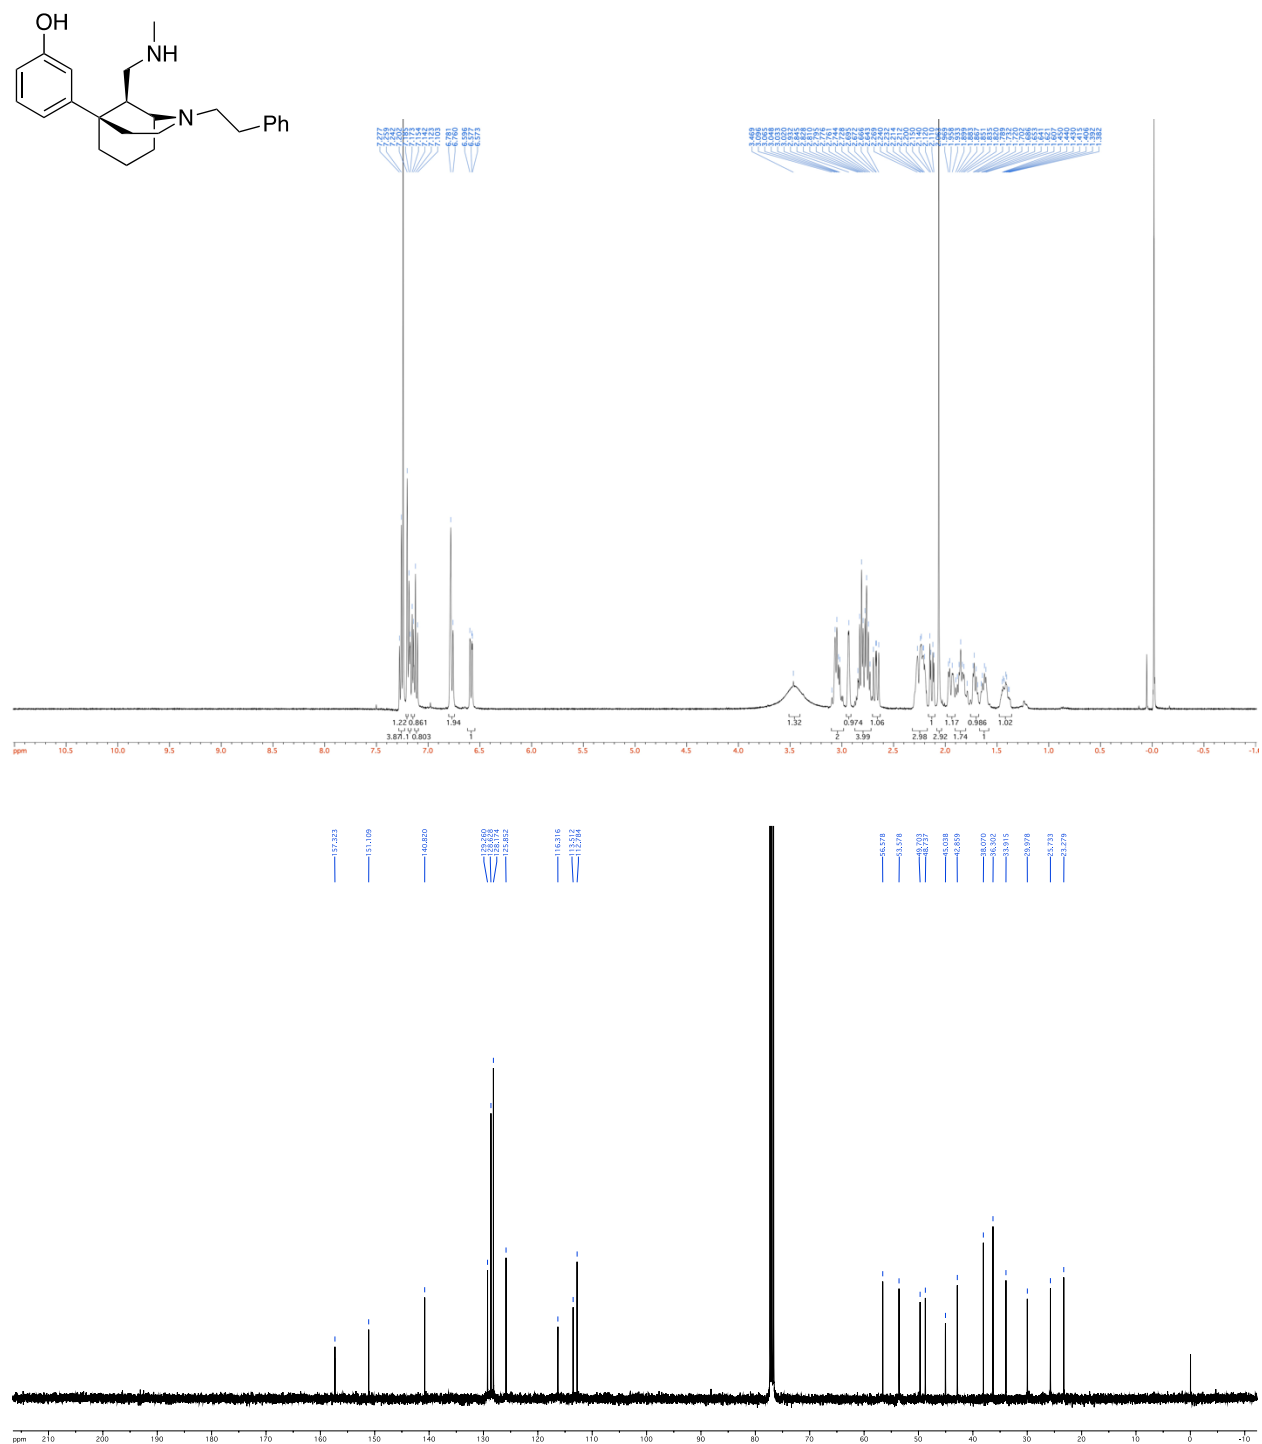

**Figure S32.**  $^1\text{H}$  NMR and  $^{13}\text{C}$  NMR of 15,5R,9S-46

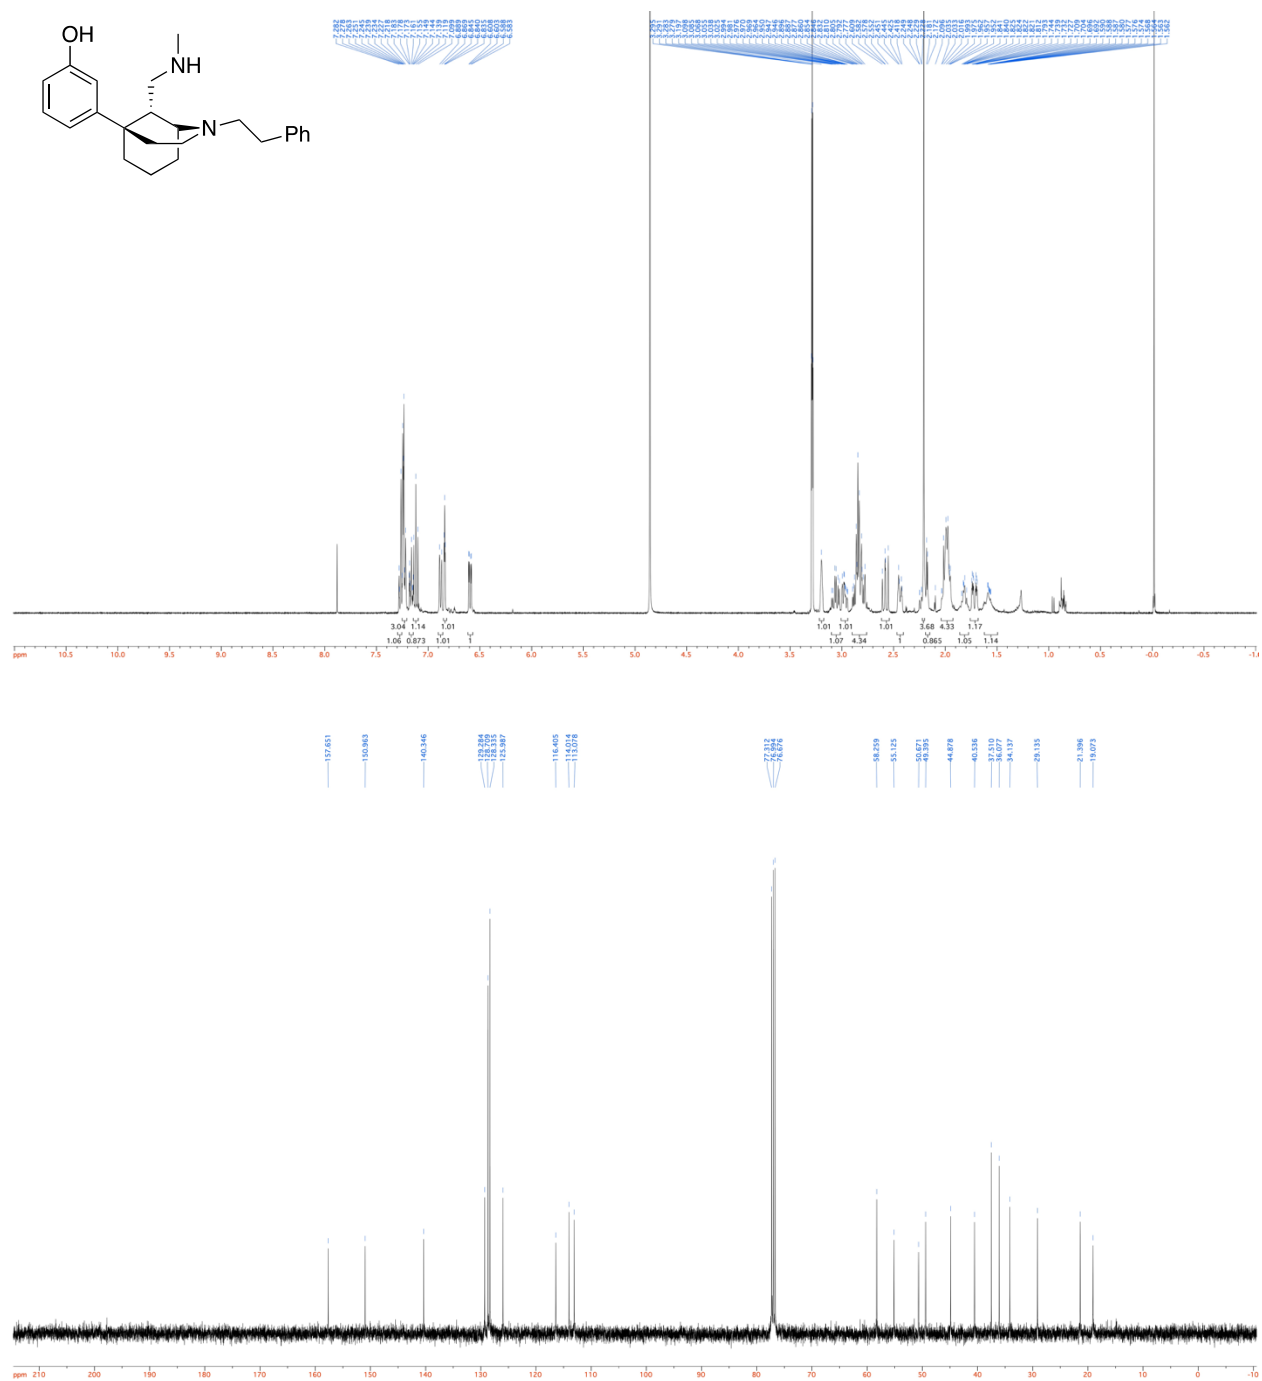

**Figure S33.** <sup>1</sup>H NMR and <sup>13</sup>C NMR of 1S,5R,9R-47

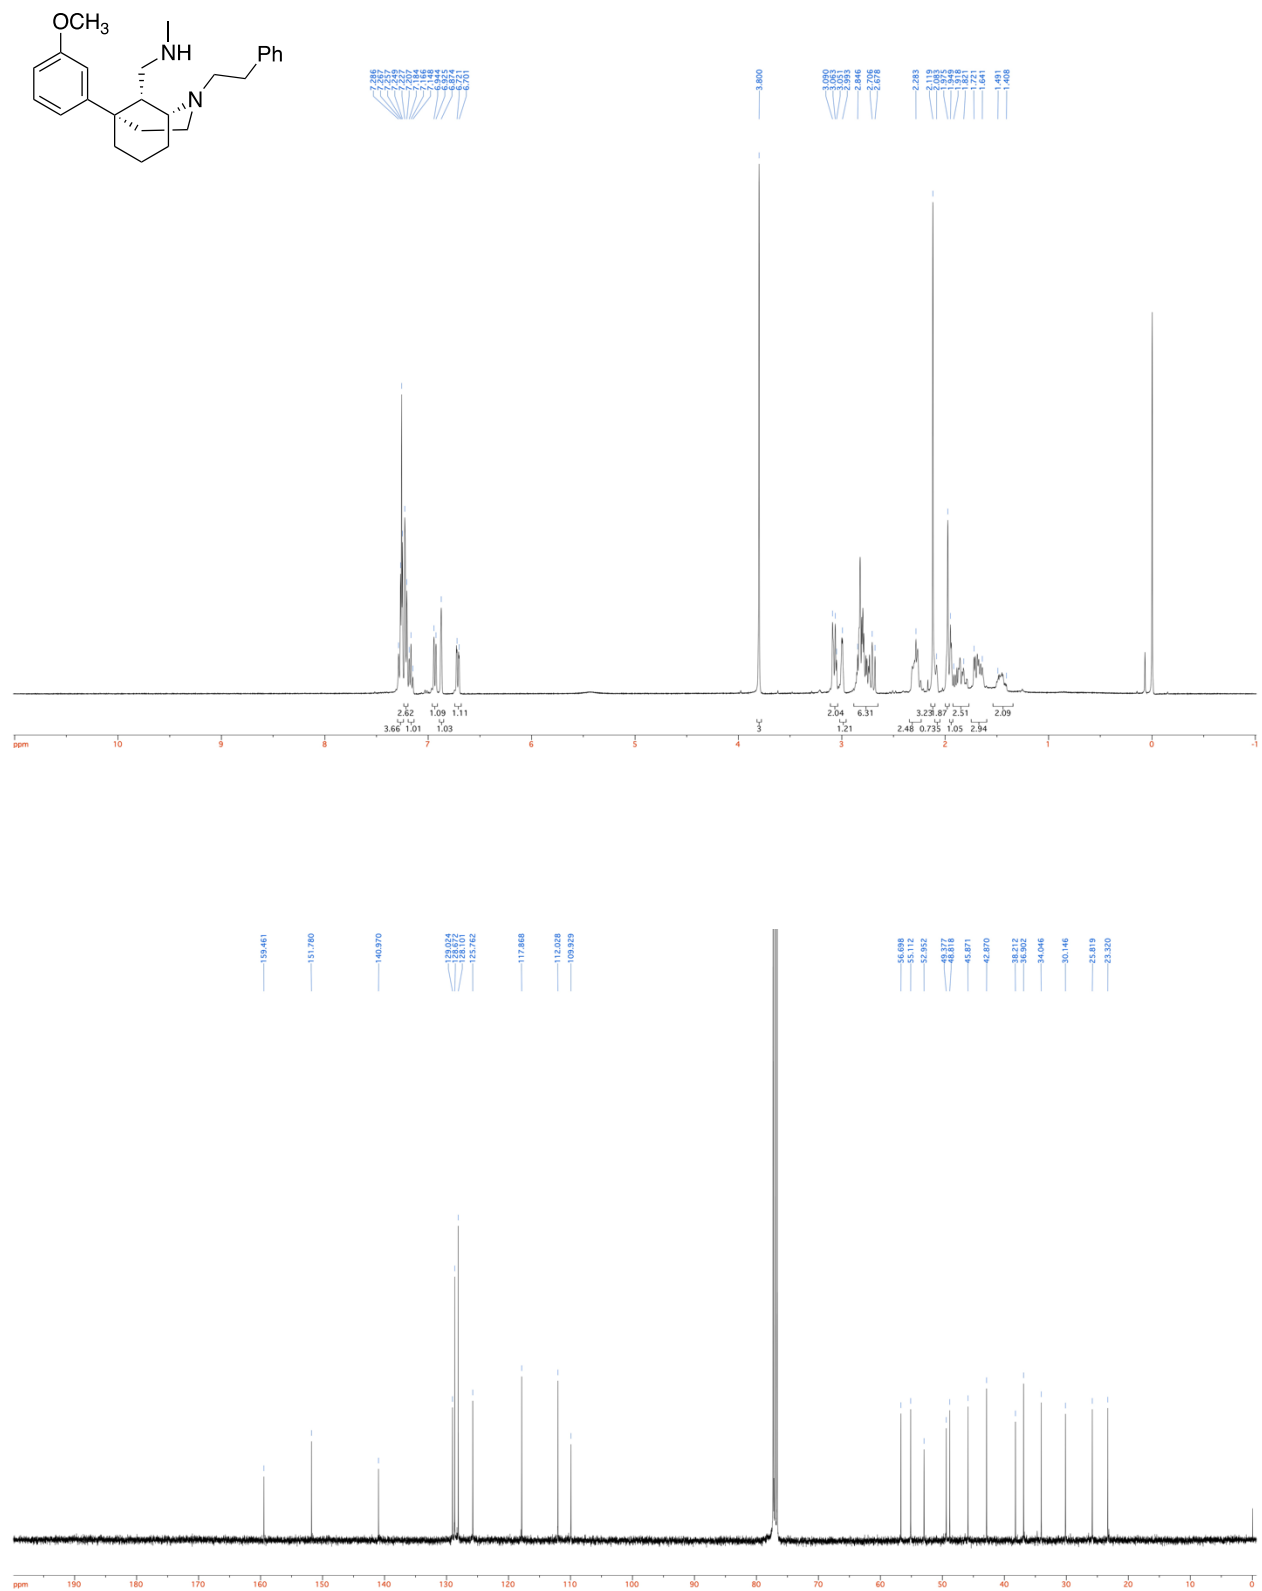

**Figure S34.** <sup>1</sup>H NMR and <sup>13</sup>C NMR of 1*R*,5*S*,9*R*-50

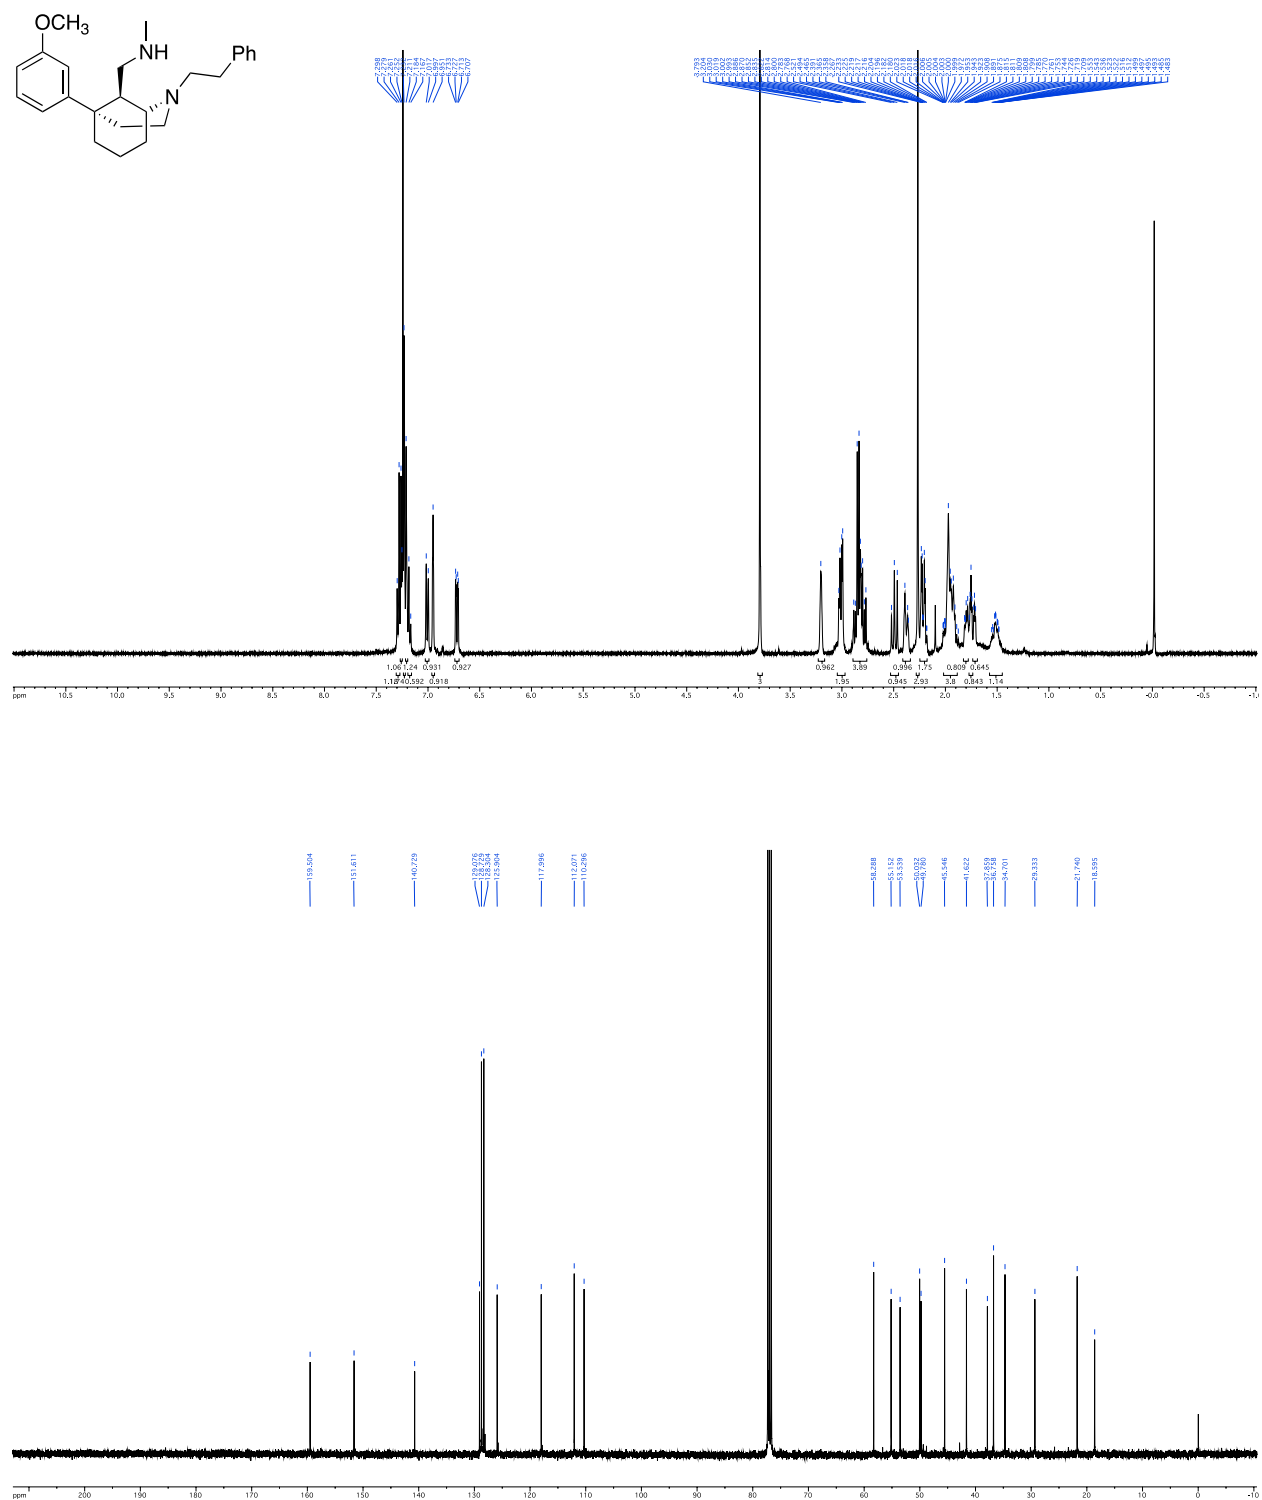

**Figure S35.** <sup>1</sup>H NMR and <sup>13</sup>C NMR of 1*R*,5*S*,9*S*-51



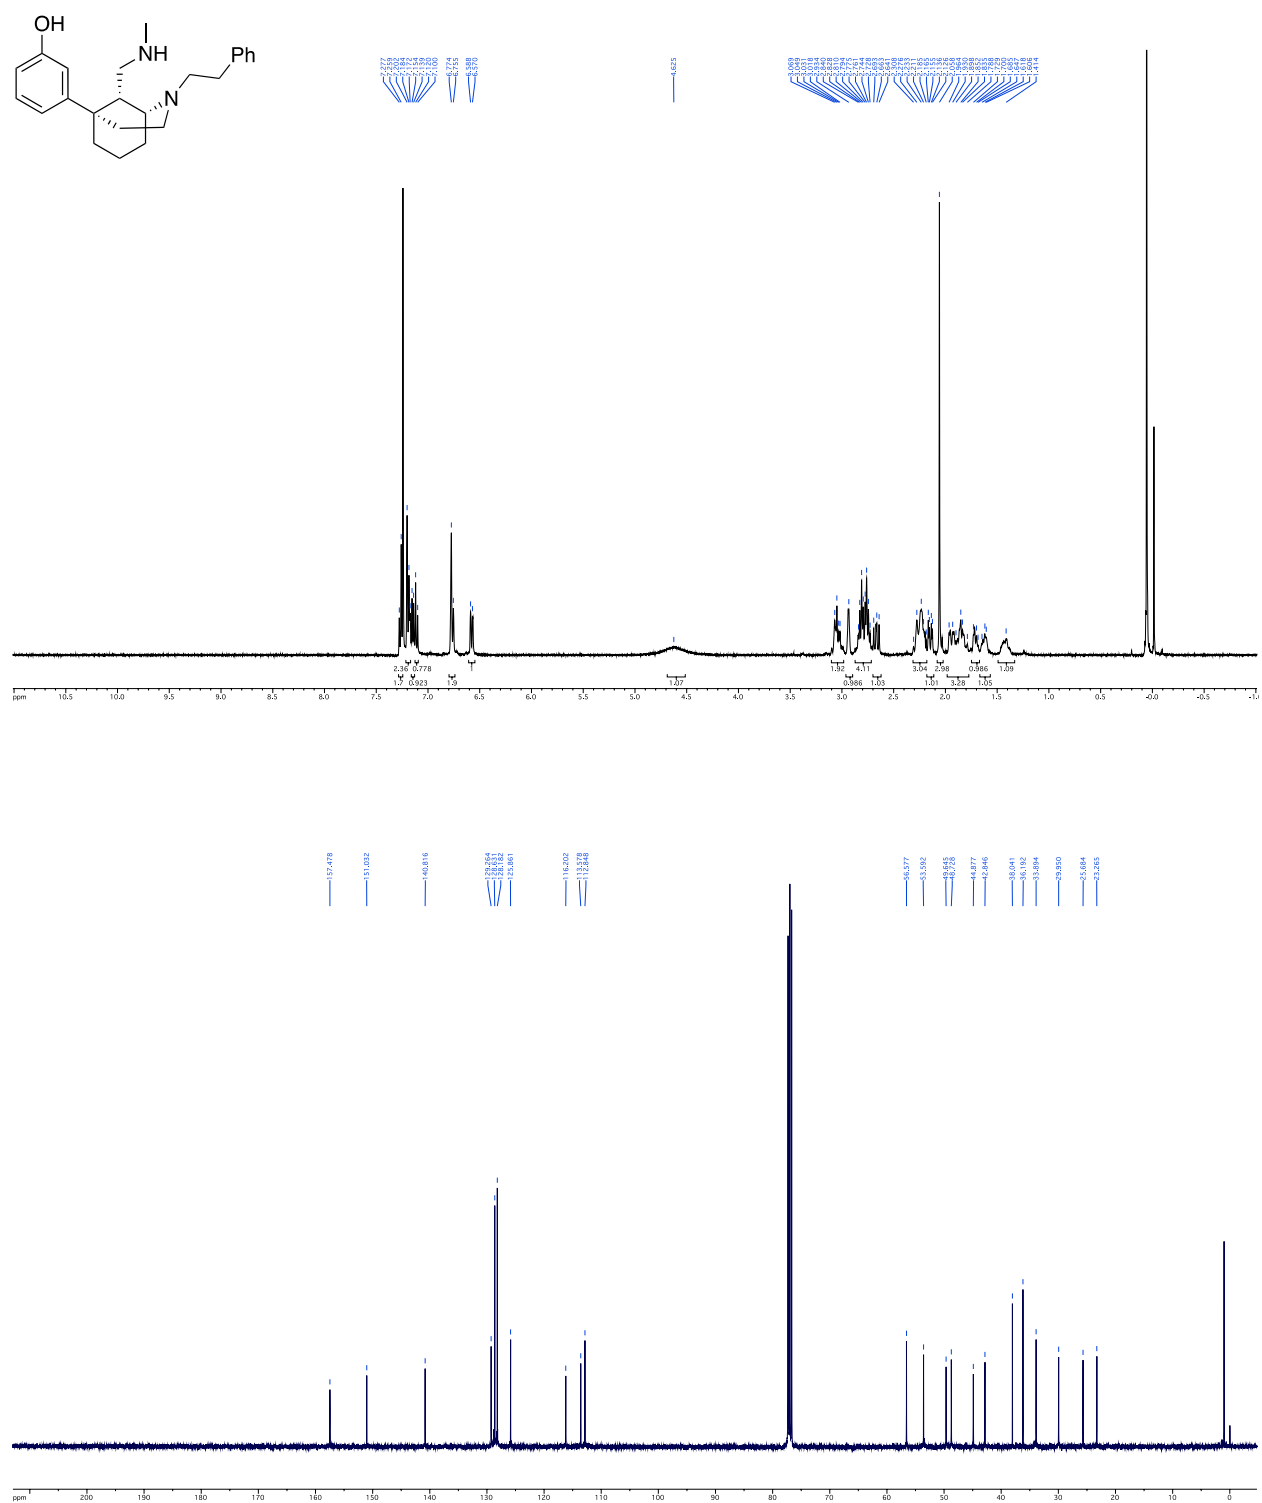

**Figure S36.** <sup>1</sup>H NMR and <sup>13</sup>C NMR of 1*R*,5*S*,9*R*-52

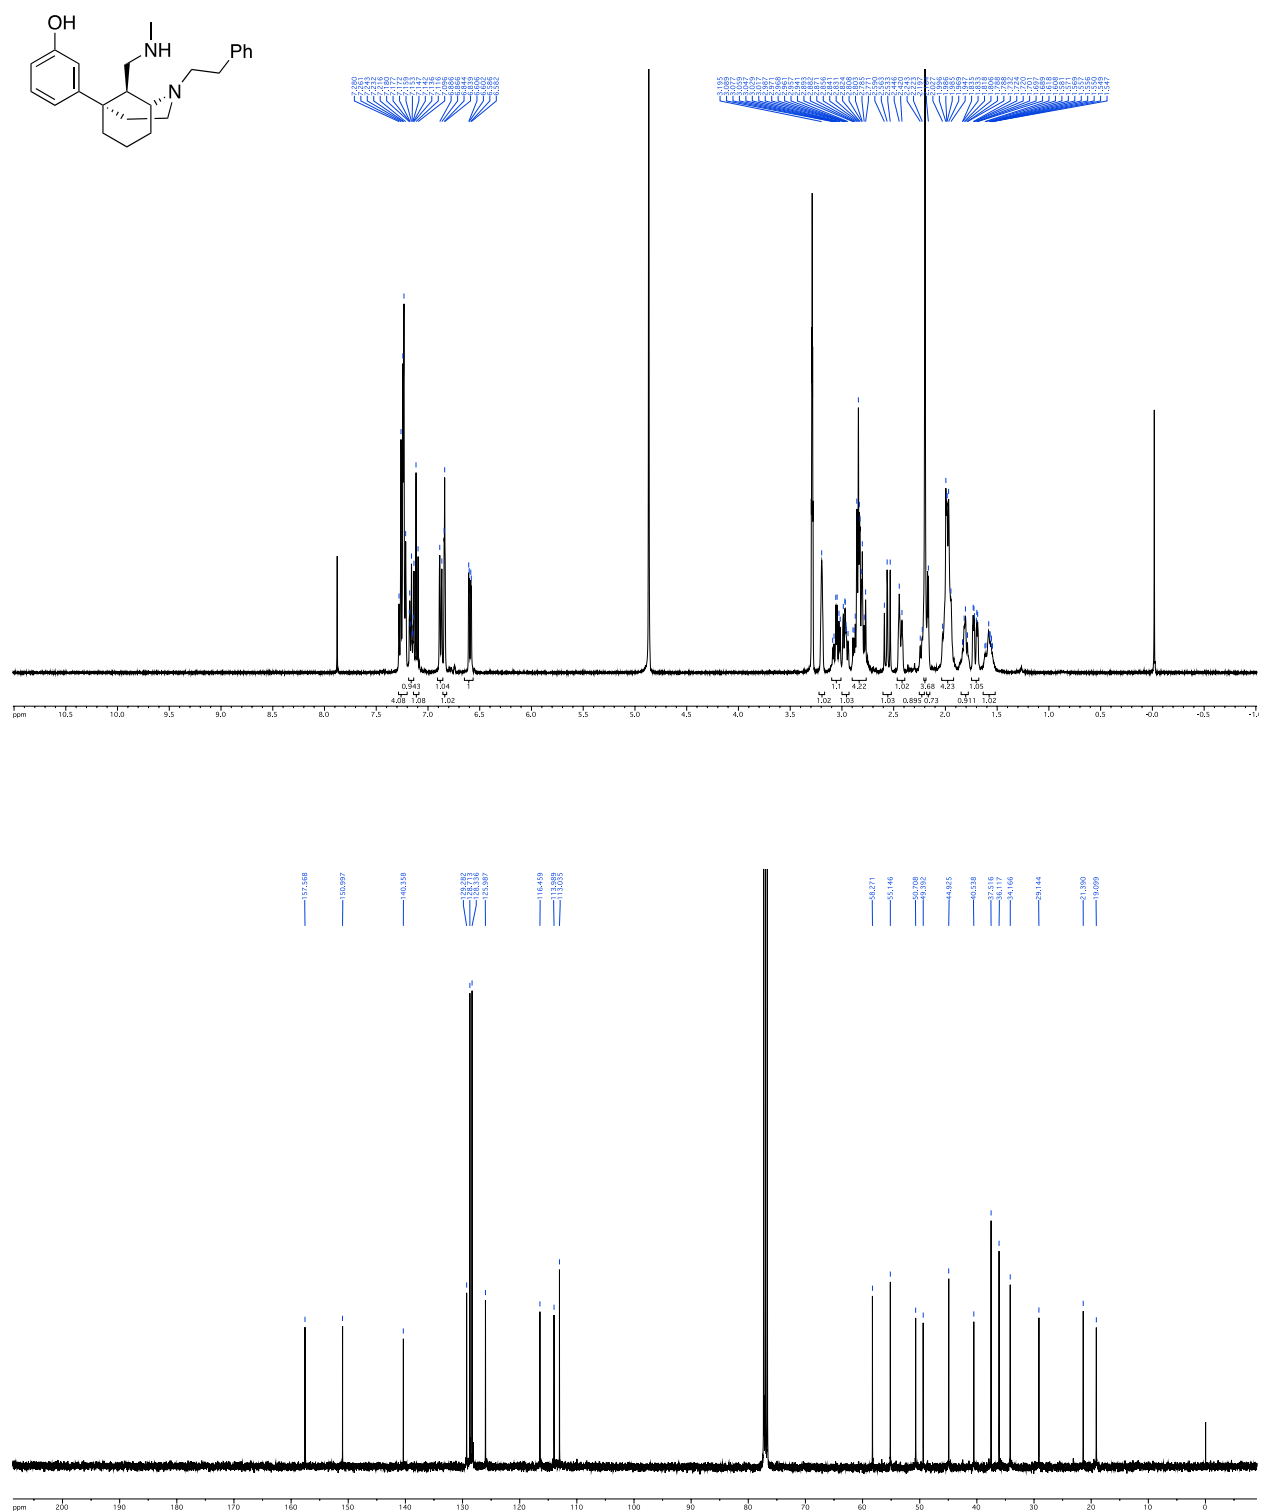

Table S1. Crystal data and structure refinement for **23**·2HCl·MeOH·H<sub>2</sub>O.

|                                   |                                                                               |          |
|-----------------------------------|-------------------------------------------------------------------------------|----------|
| Identification code               | Compound <b>23</b>                                                            |          |
| Empirical formula                 | C <sub>23</sub> H <sub>36</sub> Cl <sub>2</sub> N <sub>2</sub> O <sub>3</sub> |          |
| Formula weight                    | 459.44                                                                        |          |
| Temperature                       | 273(2) K                                                                      |          |
| Wavelength                        | 1.54178 Å                                                                     |          |
| Crystal system                    | Orthorhombic                                                                  |          |
| Space group                       | P 21 21 21                                                                    |          |
| Unit cell dimensions              | a = 7.0129(2) Å                                                               | α = 90°. |
|                                   | b = 13.7614(3) Å                                                              | β = 90°. |
|                                   | c = 26.4132(6) Å                                                              | γ = 90°. |
| Volume                            | 2549.07(11) Å <sup>3</sup>                                                    |          |
| Collected on                      | Cu Kα Bruker D8 Quest SMART APEX II CCD                                       |          |
| Z                                 | 4                                                                             |          |
| Density (calculated)              | 1.197 Mg/m <sup>3</sup>                                                       |          |
| Absorption coefficient            | 2.484 mm <sup>-1</sup>                                                        |          |
| F(000)                            | 984                                                                           |          |
| Crystal size                      | 0.341 x 0.046 x 0.030 mm <sup>3</sup>                                         |          |
| Theta range for data collection   | 3.346 to 74.641°.                                                             |          |
| Index ranges                      | -8 ≤ h ≤ 8, -17 ≤ k ≤ 17, -32 ≤ l ≤ 33                                        |          |
| Reflections collected             | 37321                                                                         |          |
| Independent reflections           | 5219 [R(int) = 0.0402]                                                        |          |
| Completeness to theta = 67.679°   | 100.0 %                                                                       |          |
| Absorption correction             | Semi-empirical from equivalents                                               |          |
| Max. and min. transmission        | 0.7538 and 0.6463                                                             |          |
| Refinement method                 | Full-matrix least-squares on F <sup>2</sup>                                   |          |
| Data / restraints / parameters    | 5219 / 20 / 296                                                               |          |
| Goodness-of-fit on F <sup>2</sup> | 1.113                                                                         |          |
| Final R indices [I > 2σ(I)]       | R1 = 0.0474, wR2 = 0.1430                                                     |          |
| R indices (all data)              | R1 = 0.0489, wR2 = 0.1445                                                     |          |
| Absolute structure parameter      | 0.032(4)                                                                      |          |
| Extinction coefficient            | 0.0018(5)                                                                     |          |
| Largest diff. peak and hole       | 1.374 and -0.263 e.Å <sup>-3</sup>                                            |          |

Table S2. Atomic coordinates ( $\times 10^4$ ) and equivalent isotropic displacement parameters ( $\text{\AA}^2 \times 10^3$ ) for **23**·2HCl·MeOH·H<sub>2</sub>O.  $U(\text{eq})$  is defined as one third of the trace of the orthogonalized  $U^{ij}$  tensor.

|        | x        | y        | z       | $U(\text{eq})$ |
|--------|----------|----------|---------|----------------|
| C(12)  | 766(6)   | 8909(3)  | 7192(1) | 32(1)          |
| C(13)  | 1252(6)  | 9876(3)  | 7137(2) | 36(1)          |
| C(14)  | 2951(7)  | 10105(3) | 6895(2) | 38(1)          |
| C(15)  | 4157(6)  | 9397(3)  | 6717(1) | 32(1)          |
| C(10)  | 3671(5)  | 8416(3)  | 6762(1) | 25(1)          |
| C(11)  | 1932(5)  | 8188(3)  | 6995(1) | 26(1)          |
| C(5)   | 4972(5)  | 7598(3)  | 6568(1) | 24(1)          |
| C(6)   | 6877(5)  | 7990(3)  | 6360(1) | 27(1)          |
| C(7)   | 8172(5)  | 7210(3)  | 6129(2) | 31(1)          |
| C(1)   | 5158(5)  | 6171(3)  | 5971(1) | 22(1)          |
| C(9)   | 3936(5)  | 7033(2)  | 6146(1) | 20(1)          |
| C(4)   | 5290(5)  | 6868(3)  | 7012(1) | 28(1)          |
| C(3)   | 6101(5)  | 5871(3)  | 6875(1) | 28(1)          |
| C(16)  | 6044(6)  | 4505(3)  | 6261(2) | 30(1)          |
| C(17)  | 5685(7)  | 3721(3)  | 6656(2) | 46(1)          |
| C(18)  | 6348(7)  | 2750(3)  | 6446(2) | 37(1)          |
| C(23)  | 5148(11) | 2193(4)  | 6157(3) | 67(2)          |
| C(22)  | 5724(16) | 1341(5)  | 5953(3) | 89(3)          |
| C(21)  | 7515(18) | 1021(5)  | 6029(3) | 92(3)          |
| C(20)  | 8797(12) | 1568(6)  | 6315(3) | 88(3)          |
| C(19)  | 8182(8)  | 2450(4)  | 6540(2) | 55(1)          |
| Cl(1)  | 1629(1)  | 6182(1)  | 4949(1) | 27(1)          |
| Cl(2)  | 1054(1)  | 5098(1)  | 6676(1) | 42(1)          |
| N(1)   | 3495(4)  | 7659(2)  | 5698(1) | 20(1)          |
| N(2)   | 5190(4)  | 5467(2)  | 6408(1) | 24(1)          |
| O(1)   | -855(4)  | 8625(2)  | 7443(1) | 38(1)          |
| O(2)   | 877(5)   | 9151(2)  | 5536(1) | 43(1)          |
| C(8)   | 7128(5)  | 6482(3)  | 5786(1) | 28(1)          |
| O(3A)  | 1668(13) | 898(7)   | 5037(3) | 77(2)          |
| C(24A) | 3204(19) | 397(9)   | 4951(4) | 75(2)          |
| O(3B)  | 5456(19) | 795(8)   | 4529(4) | 74(3)          |
| C(24B) | 6820(30) | 761(12)  | 4364(6) | 75(3)          |

Table S3. Bond lengths [Å] and angles [°] for **23**·2HCl·MeOH·H<sub>2</sub>O.

---

|              |          |
|--------------|----------|
| C(12)-O(1)   | 1.372(5) |
| C(12)-C(13)  | 1.382(6) |
| C(12)-C(11)  | 1.387(5) |
| C(13)-C(14)  | 1.388(7) |
| C(13)-H(13)  | 0.9300   |
| C(14)-C(15)  | 1.373(6) |
| C(14)-H(14)  | 0.9300   |
| C(15)-C(10)  | 1.397(6) |
| C(15)-H(15)  | 0.9300   |
| C(10)-C(11)  | 1.402(5) |
| C(10)-C(5)   | 1.537(5) |
| C(11)-H(11)  | 0.9300   |
| C(5)-C(9)    | 1.541(4) |
| C(5)-C(6)    | 1.543(5) |
| C(5)-C(4)    | 1.560(5) |
| C(6)-C(7)    | 1.532(6) |
| C(6)-H(6A)   | 0.9700   |
| C(6)-H(6B)   | 0.9700   |
| C(7)-C(8)    | 1.536(6) |
| C(7)-H(7A)   | 0.9700   |
| C(7)-H(7B)   | 0.9700   |
| C(1)-N(2)    | 1.507(4) |
| C(1)-C(8)    | 1.526(5) |
| C(1)-C(9)    | 1.535(5) |
| C(1)-H(1)    | 0.9800   |
| C(9)-N(1)    | 1.496(4) |
| C(9)-H(9)    | 0.9800   |
| C(4)-C(3)    | 1.528(6) |
| C(4)-H(4A)   | 0.9700   |
| C(4)-H(4B)   | 0.9700   |
| C(3)-N(2)    | 1.496(5) |
| C(3)-H(3A)   | 0.9700   |
| C(3)-H(3B)   | 0.9700   |
| C(16)-N(2)   | 1.503(5) |
| C(16)-C(17)  | 1.522(5) |
| C(16)-H(16A) | 0.9700   |
| C(16)-H(16B) | 0.9700   |

|              |           |
|--------------|-----------|
| C(17)-C(18)  | 1.520(6)  |
| C(17)-H(17A) | 0.9700    |
| C(17)-H(17B) | 0.9700    |
| C(18)-C(23)  | 1.370(8)  |
| C(18)-C(19)  | 1.374(7)  |
| C(23)-C(22)  | 1.352(11) |
| C(23)-H(23)  | 0.9300    |
| C(22)-C(21)  | 1.346(14) |
| C(22)-H(22)  | 0.9300    |
| C(21)-C(20)  | 1.394(14) |
| C(21)-H(21)  | 0.9300    |
| C(20)-C(19)  | 1.418(10) |
| C(20)-H(20)  | 0.9300    |
| C(19)-H(19)  | 0.9300    |
| N(1)-H(1A)   | 0.8900    |
| N(1)-H(1B)   | 0.8900    |
| N(1)-H(1C)   | 0.8900    |
| N(2)-H(2)    | 0.9800    |
| O(1)-H(1D)   | 0.8200    |
| O(2)-H(2A)   | 0.8501    |
| O(2)-H(2B)   | 0.8500    |
| C(8)-H(8A)   | 0.9700    |
| C(8)-H(8B)   | 0.9700    |
| O(3A)-C(24A) | 1.299(15) |
| O(3B)-C(24B) | 1.055(17) |

|                   |          |
|-------------------|----------|
| O(1)-C(12)-C(13)  | 122.0(4) |
| O(1)-C(12)-C(11)  | 117.7(4) |
| C(13)-C(12)-C(11) | 120.3(4) |
| C(12)-C(13)-C(14) | 118.6(4) |
| C(12)-C(13)-H(13) | 120.7    |
| C(14)-C(13)-H(13) | 120.7    |
| C(15)-C(14)-C(13) | 121.7(4) |
| C(15)-C(14)-H(14) | 119.2    |
| C(13)-C(14)-H(14) | 119.2    |
| C(14)-C(15)-C(10) | 120.4(4) |
| C(14)-C(15)-H(15) | 119.8    |
| C(10)-C(15)-H(15) | 119.8    |
| C(15)-C(10)-C(11) | 117.8(3) |

|                   |          |
|-------------------|----------|
| C(15)-C(10)-C(5)  | 122.3(3) |
| C(11)-C(10)-C(5)  | 119.9(3) |
| C(12)-C(11)-C(10) | 121.2(4) |
| C(12)-C(11)-H(11) | 119.4    |
| C(10)-C(11)-H(11) | 119.4    |
| C(10)-C(5)-C(9)   | 109.3(3) |
| C(10)-C(5)-C(6)   | 112.1(3) |
| C(9)-C(5)-C(6)    | 109.0(3) |
| C(10)-C(5)-C(4)   | 107.9(3) |
| C(9)-C(5)-C(4)    | 106.6(3) |
| C(6)-C(5)-C(4)    | 111.7(3) |
| C(7)-C(6)-C(5)    | 114.2(3) |
| C(7)-C(6)-H(6A)   | 108.7    |
| C(5)-C(6)-H(6A)   | 108.7    |
| C(7)-C(6)-H(6B)   | 108.7    |
| C(5)-C(6)-H(6B)   | 108.7    |
| H(6A)-C(6)-H(6B)  | 107.6    |
| C(6)-C(7)-C(8)    | 114.1(3) |
| C(6)-C(7)-H(7A)   | 108.7    |
| C(8)-C(7)-H(7A)   | 108.7    |
| C(6)-C(7)-H(7B)   | 108.7    |
| C(8)-C(7)-H(7B)   | 108.7    |
| H(7A)-C(7)-H(7B)  | 107.6    |
| N(2)-C(1)-C(8)    | 114.3(3) |
| N(2)-C(1)-C(9)    | 105.9(3) |
| C(8)-C(1)-C(9)    | 112.6(3) |
| N(2)-C(1)-H(1)    | 107.9    |
| C(8)-C(1)-H(1)    | 107.9    |
| C(9)-C(1)-H(1)    | 107.9    |
| N(1)-C(9)-C(1)    | 108.8(3) |
| N(1)-C(9)-C(5)    | 112.3(3) |
| C(1)-C(9)-C(5)    | 110.2(3) |
| N(1)-C(9)-H(9)    | 108.5    |
| C(1)-C(9)-H(9)    | 108.5    |
| C(5)-C(9)-H(9)    | 108.5    |
| C(3)-C(4)-C(5)    | 117.0(3) |
| C(3)-C(4)-H(4A)   | 108.1    |
| C(5)-C(4)-H(4A)   | 108.1    |
| C(3)-C(4)-H(4B)   | 108.1    |

|                     |          |
|---------------------|----------|
| C(5)-C(4)-H(4B)     | 108.1    |
| H(4A)-C(4)-H(4B)    | 107.3    |
| N(2)-C(3)-C(4)      | 111.7(3) |
| N(2)-C(3)-H(3A)     | 109.3    |
| C(4)-C(3)-H(3A)     | 109.3    |
| N(2)-C(3)-H(3B)     | 109.3    |
| C(4)-C(3)-H(3B)     | 109.3    |
| H(3A)-C(3)-H(3B)    | 107.9    |
| N(2)-C(16)-C(17)    | 112.4(3) |
| N(2)-C(16)-H(16A)   | 109.1    |
| C(17)-C(16)-H(16A)  | 109.1    |
| N(2)-C(16)-H(16B)   | 109.1    |
| C(17)-C(16)-H(16B)  | 109.1    |
| H(16A)-C(16)-H(16B) | 107.9    |
| C(18)-C(17)-C(16)   | 108.8(4) |
| C(18)-C(17)-H(17A)  | 109.9    |
| C(16)-C(17)-H(17A)  | 109.9    |
| C(18)-C(17)-H(17B)  | 109.9    |
| C(16)-C(17)-H(17B)  | 109.9    |
| H(17A)-C(17)-H(17B) | 108.3    |
| C(23)-C(18)-C(19)   | 120.5(5) |
| C(23)-C(18)-C(17)   | 120.5(5) |
| C(19)-C(18)-C(17)   | 119.0(5) |
| C(22)-C(23)-C(18)   | 121.6(8) |
| C(22)-C(23)-H(23)   | 119.2    |
| C(18)-C(23)-H(23)   | 119.2    |
| C(21)-C(22)-C(23)   | 120.2(8) |
| C(21)-C(22)-H(22)   | 119.9    |
| C(23)-C(22)-H(22)   | 119.9    |
| C(22)-C(21)-C(20)   | 120.4(7) |
| C(22)-C(21)-H(21)   | 119.8    |
| C(20)-C(21)-H(21)   | 119.8    |
| C(21)-C(20)-C(19)   | 119.5(7) |
| C(21)-C(20)-H(20)   | 120.3    |
| C(19)-C(20)-H(20)   | 120.3    |
| C(18)-C(19)-C(20)   | 117.8(6) |
| C(18)-C(19)-H(19)   | 121.1    |
| C(20)-C(19)-H(19)   | 121.1    |
| C(9)-N(1)-H(1A)     | 109.5    |



|                  |          |
|------------------|----------|
| C(9)-N(1)-H(1B)  | 109.5    |
| H(1A)-N(1)-H(1B) | 109.5    |
| C(9)-N(1)-H(1C)  | 109.5    |
| H(1A)-N(1)-H(1C) | 109.5    |
| H(1B)-N(1)-H(1C) | 109.5    |
| C(3)-N(2)-C(16)  | 111.7(3) |
| C(3)-N(2)-C(1)   | 113.5(3) |
| C(16)-N(2)-C(1)  | 112.0(3) |
| C(3)-N(2)-H(2)   | 106.4    |
| C(16)-N(2)-H(2)  | 106.4    |
| C(1)-N(2)-H(2)   | 106.4    |
| C(12)-O(1)-H(1D) | 109.5    |
| H(2A)-O(2)-H(2B) | 104.5    |
| C(1)-C(8)-C(7)   | 115.2(3) |
| C(1)-C(8)-H(8A)  | 108.5    |
| C(7)-C(8)-H(8A)  | 108.5    |
| C(1)-C(8)-H(8B)  | 108.5    |
| C(7)-C(8)-H(8B)  | 108.5    |
| H(8A)-C(8)-H(8B) | 107.5    |

Table S4. Anisotropic displacement parameters ( $\text{\AA}^2 \times 10^3$ ) for **23**·2HCl·MeOH·H<sub>2</sub>O. The anisotropic displacement factor exponent takes the form:  $-2\pi^2 [ h^2 a^{*2} U^{11} + \dots + 2 h k a^* b^* U^{12} ]$

|        | U <sup>11</sup> | U <sup>22</sup> | U <sup>33</sup> | U <sup>23</sup> | U <sup>13</sup> | U <sup>12</sup> |
|--------|-----------------|-----------------|-----------------|-----------------|-----------------|-----------------|
| C(12)  | 28(2)           | 46(2)           | 21(2)           | -12(2)          | -6(1)           | 3(2)            |
| C(13)  | 42(2)           | 40(2)           | 27(2)           | -10(2)          | -4(2)           | 8(2)            |
| C(14)  | 53(3)           | 31(2)           | 30(2)           | -2(2)           | -5(2)           | -1(2)           |
| C(15)  | 36(2)           | 38(2)           | 21(2)           | 0(2)            | -4(2)           | -4(2)           |
| C(10)  | 24(2)           | 34(2)           | 17(1)           | -2(1)           | -4(1)           | 1(1)            |
| C(11)  | 23(2)           | 35(2)           | 22(2)           | -7(1)           | -5(1)           | 0(1)            |
| C(5)   | 19(2)           | 35(2)           | 18(2)           | 2(1)            | -2(1)           | -1(1)           |
| C(6)   | 18(2)           | 41(2)           | 23(2)           | 3(1)            | -3(1)           | -6(2)           |
| C(7)   | 16(2)           | 44(2)           | 34(2)           | 10(2)           | 0(1)            | -1(2)           |
| C(1)   | 19(2)           | 29(2)           | 20(1)           | 6(1)            | 2(1)            | 5(1)            |
| C(9)   | 14(1)           | 28(2)           | 17(1)           | 3(1)            | 0(1)            | 1(1)            |
| C(4)   | 22(2)           | 43(2)           | 19(2)           | 6(2)            | -3(1)           | 2(2)            |
| C(3)   | 22(2)           | 40(2)           | 23(2)           | 9(1)            | -3(1)           | 4(1)            |
| C(16)  | 26(2)           | 32(2)           | 33(2)           | 8(2)            | 3(2)            | 8(2)            |
| C(17)  | 48(3)           | 41(2)           | 48(2)           | 20(2)           | 13(2)           | 14(2)           |
| C(18)  | 39(2)           | 34(2)           | 37(2)           | 15(2)           | 5(2)            | 5(2)            |
| C(23)  | 74(4)           | 49(3)           | 78(4)           | 20(3)           | -7(3)           | -23(3)          |
| C(22)  | 129(8)          | 50(4)           | 89(5)           | 4(3)            | 4(5)            | -28(5)          |
| C(21)  | 161(9)          | 33(3)           | 82(5)           | 2(3)            | 48(6)           | -4(4)           |
| C(20)  | 77(5)           | 77(4)           | 110(6)          | 46(4)           | 35(4)           | 48(4)           |
| C(19)  | 48(3)           | 51(3)           | 67(3)           | 20(2)           | 1(3)            | 16(2)           |
| Cl(1)  | 29(1)           | 28(1)           | 24(1)           | 1(1)            | -5(1)           | 1(1)            |
| Cl(2)  | 19(1)           | 53(1)           | 53(1)           | 32(1)           | 6(1)            | 3(1)            |
| N(1)   | 17(1)           | 26(1)           | 17(1)           | 1(1)            | -2(1)           | 1(1)            |
| N(2)   | 20(1)           | 31(2)           | 22(1)           | 8(1)            | 2(1)            | 3(1)            |
| O(1)   | 25(1)           | 51(2)           | 38(2)           | -22(1)          | 3(1)            | -1(1)           |
| O(2)   | 31(2)           | 37(2)           | 61(2)           | 5(1)            | -3(2)           | 3(1)            |
| C(8)   | 21(2)           | 33(2)           | 29(2)           | 8(2)            | 9(1)            | 6(1)            |
| O(3A)  | 81(5)           | 90(5)           | 60(4)           | 13(3)           | -22(4)          | -28(4)          |
| C(24A) | 80(5)           | 85(5)           | 60(4)           | 13(4)           | -22(4)          | -29(4)          |
| O(3B)  | 93(7)           | 62(5)           | 66(6)           | 8(4)            | -10(5)          | 5(6)            |
| C(24B) | 94(7)           | 62(5)           | 68(6)           | 8(4)            | -9(5)           | 5(6)            |

Table S5. Hydrogen coordinates ( $\times 10^4$ ) and isotropic displacement parameters ( $\text{\AA}^2 \times 10^3$ ) for **23**·2HCl·MeOH·H<sub>2</sub>O.

|        | x     | y     | z    | U(eq) |
|--------|-------|-------|------|-------|
| H(13)  | 458   | 10364 | 7260 | 43    |
| H(14)  | 3280  | 10755 | 6852 | 46    |
| H(15)  | 5305  | 9571  | 6566 | 38    |
| H(11)  | 1553  | 7542  | 7018 | 32    |
| H(6A)  | 6607  | 8475  | 6103 | 33    |
| H(6B)  | 7559  | 8310  | 6633 | 33    |
| H(7A)  | 8786  | 6855  | 6401 | 38    |
| H(7B)  | 9163  | 7527  | 5934 | 38    |
| H(1)   | 4499  | 5856  | 5688 | 27    |
| H(9)   | 2735  | 6781  | 6283 | 24    |
| H(4A)  | 6144  | 7168  | 7255 | 33    |
| H(4B)  | 4078  | 6769  | 7181 | 33    |
| H(3A)  | 7465  | 5927  | 6821 | 34    |
| H(3B)  | 5895  | 5427  | 7155 | 34    |
| H(16A) | 7408  | 4584  | 6215 | 36    |
| H(16B) | 5506  | 4300  | 5940 | 36    |
| H(17A) | 6378  | 3871  | 6964 | 55    |
| H(17B) | 4336  | 3691  | 6736 | 55    |
| H(23)  | 3909  | 2406  | 6100 | 80    |
| H(22)  | 4880  | 975   | 5760 | 107   |
| H(21)  | 7901  | 433   | 5889 | 111   |
| H(20)  | 10045 | 1355  | 6358 | 106   |
| H(19)  | 8994  | 2813  | 6744 | 66    |
| H(1A)  | 2949  | 7300  | 5458 | 24    |
| H(1B)  | 4569  | 7916  | 5579 | 24    |
| H(1C)  | 2703  | 8132  | 5791 | 24    |
| H(2)   | 3856  | 5338  | 6495 | 29    |
| H(1D)  | -1196 | 9059  | 7635 | 57    |
| H(2A)  | 996   | 9068  | 5854 | 64    |
| H(2B)  | 1359  | 9708  | 5481 | 64    |
| H(8A)  | 6994  | 6769  | 5453 | 33    |
| H(8B)  | 7916  | 5907  | 5751 | 33    |

Table S6. Torsion angles [°] for **23**·2HCl·MeOH·H<sub>2</sub>O.

|                         |           |
|-------------------------|-----------|
| O(1)-C(12)-C(13)-C(14)  | 177.7(3)  |
| C(11)-C(12)-C(13)-C(14) | -1.9(6)   |
| C(12)-C(13)-C(14)-C(15) | -0.9(6)   |
| C(13)-C(14)-C(15)-C(10) | 2.1(6)    |
| C(14)-C(15)-C(10)-C(11) | -0.4(5)   |
| C(14)-C(15)-C(10)-C(5)  | 179.9(3)  |
| O(1)-C(12)-C(11)-C(10)  | -176.0(3) |
| C(13)-C(12)-C(11)-C(10) | 3.6(5)    |
| C(15)-C(10)-C(11)-C(12) | -2.4(5)   |
| C(5)-C(10)-C(11)-C(12)  | 177.3(3)  |
| C(15)-C(10)-C(5)-C(9)   | -117.2(4) |
| C(11)-C(10)-C(5)-C(9)   | 63.1(4)   |
| C(15)-C(10)-C(5)-C(6)   | 3.8(4)    |
| C(11)-C(10)-C(5)-C(6)   | -175.8(3) |
| C(15)-C(10)-C(5)-C(4)   | 127.2(4)  |
| C(11)-C(10)-C(5)-C(4)   | -52.4(4)  |
| C(10)-C(5)-C(6)-C(7)    | -176.1(3) |
| C(9)-C(5)-C(6)-C(7)     | -54.9(4)  |
| C(4)-C(5)-C(6)-C(7)     | 62.7(4)   |
| C(5)-C(6)-C(7)-C(8)     | 44.1(4)   |
| N(2)-C(1)-C(9)-N(1)     | -168.0(3) |
| C(8)-C(1)-C(9)-N(1)     | 66.3(3)   |
| N(2)-C(1)-C(9)-C(5)     | 68.5(3)   |
| C(8)-C(1)-C(9)-C(5)     | -57.2(4)  |
| C(10)-C(5)-C(9)-N(1)    | 62.2(3)   |
| C(6)-C(5)-C(9)-N(1)     | -60.7(3)  |
| C(4)-C(5)-C(9)-N(1)     | 178.6(3)  |
| C(10)-C(5)-C(9)-C(1)    | -176.4(3) |
| C(6)-C(5)-C(9)-C(1)     | 60.8(3)   |
| C(4)-C(5)-C(9)-C(1)     | -60.0(3)  |
| C(10)-C(5)-C(4)-C(3)    | 164.7(3)  |
| C(9)-C(5)-C(4)-C(3)     | 47.3(4)   |
| C(6)-C(5)-C(4)-C(3)     | -71.7(4)  |
| C(5)-C(4)-C(3)-N(2)     | -42.7(4)  |
| N(2)-C(16)-C(17)-C(18)  | 172.2(4)  |
| C(16)-C(17)-C(18)-C(23) | -86.7(5)  |
| C(16)-C(17)-C(18)-C(19) | 91.8(5)   |

|                         |           |
|-------------------------|-----------|
| C(19)-C(18)-C(23)-C(22) | -0.5(9)   |
| C(17)-C(18)-C(23)-C(22) | 178.0(6)  |
| C(18)-C(23)-C(22)-C(21) | -0.4(11)  |
| C(23)-C(22)-C(21)-C(20) | -0.4(12)  |
| C(22)-C(21)-C(20)-C(19) | 2.0(11)   |
| C(23)-C(18)-C(19)-C(20) | 2.0(8)    |
| C(17)-C(18)-C(19)-C(20) | -176.5(5) |
| C(21)-C(20)-C(19)-C(18) | -2.7(9)   |
| C(4)-C(3)-N(2)-C(16)    | 177.7(3)  |
| C(4)-C(3)-N(2)-C(1)     | 49.9(4)   |
| C(17)-C(16)-N(2)-C(3)   | 64.4(4)   |
| C(17)-C(16)-N(2)-C(1)   | -167.1(4) |
| C(8)-C(1)-N(2)-C(3)     | 62.1(4)   |
| C(9)-C(1)-N(2)-C(3)     | -62.5(3)  |
| C(8)-C(1)-N(2)-C(16)    | -65.5(4)  |
| C(9)-C(1)-N(2)-C(16)    | 169.9(3)  |
| N(2)-C(1)-C(8)-C(7)     | -74.9(4)  |
| C(9)-C(1)-C(8)-C(7)     | 46.1(4)   |
| C(6)-C(7)-C(8)-C(1)     | -39.1(4)  |
